# Supplementary material for: Ethics in extracorporeal life support: a narrative review
Source: Crit Care. 2021 Jul 21;25:256. doi: 10.1186/s13054-021-03689-0 (PMC8293515; doi:10.1186/s13054-021-03689-0)
Supplement: Supplementary file 1 — Additional file 1. List of PubMed-cited articles dealing with the ethics of ECLS, categorised by provenance (country), their excerpted ethical content, their corresponding ethical discourse and biographical data. [file 13054_2021_3689_MOESM1_ESM.xlsx]

## Sheet: Tabel uden ekskl. artikler
							Titel screening(0/1 for relevans)		Abstract gennemgang (0/1)
Publication Year	Authors	Title	PMID	Country	Ethical discourse	Format	Alix	Jesper	Marcs tidligere og midlertidig	Alix	Jesper	Alix'husk	Søren	Ethical content	Authors	Citation	First Author	Journal/Book	Create Date	PMCID	PMID	NIHMS ID	DOI
1977	Frank HA.	Ethics of randomization: use of extracorporeal membrane oxygenation	834205	USA (MA)	Trials and evidence	Commentary	1	1	1					RCT is not the best way of determining how well ECMO substitutes for an organ, but may facilitate a decision on whether organ substitution is useful in the treatment of the underlying disease. RCT should therefore supplement rather than supplant observational studies.	Frank HA.	N Engl J Med. 1977 Feb 17;296(7):397-8.	Frank HA	N Engl J Med	1977-02-17		834205
1990	Chalmers TC.	A belated randomized control trial	2406691	USA (MA, NY)	Trials and evidence	Commentary	1	1	1					Evidence of the efficacy of ECMO is still lacking. Therefore, clinicians should prepare controlled studies and randomise their patients early, with support from institutional review boards, ethicists and third parties. In the absence of evidence of efficacy, both the withholding and the delivery of a new treatment are equally less ethical than randomised assignments under controlled conditions.	Chalmers TC.	Pediatrics. 1990 Mar;85(3):366-9.	Chalmers TC	Pediatrics	1990-03-01		2406691
1990	Lantos JD, Frader J.	Extracorporeal membrane oxygenation and the ethics of clinical research in pediatrics	2196466	USA (IL), USA (PA)	Trials and evidence	Essay	1	1	1					Critics of the development and evaluation of ECMO may wish for a degree of certainty that is unattainable without sacrificing other important values. A new scientific framework is therefore needed that takes into account the inherent uncertainty, the degree of which will depend on how the decision-makers resolve tensions among a number of important, competing values. A given study is always neces…	Lantos JD, Frader J.	N Engl J Med. 1990 Aug 9;323(6):409-13. doi: 10.1056/NEJM199008093230610.	Lantos JD	N Engl J Med	1990-08-09		2196466		10.1056/NEJM199008093230610
1990	Miké V.	Suspended judgment. Ethics, evidence, and uncertainty	2163810	USA (NY)	Trials and evidence	Essay	1	1	1					Uncertainties are inherent in statistical inference and are also seen in ECMO trials. Mass press reporting entails a risk of obscuring medical uncertainties, such as the patient selection criteria for ECMO.	Miké V.	Control Clin Trials. 1990 Jun;11(3):153-6. doi: 10.1016/0197-2456(90)90009-q.	Miké V	Control Clin Trials	1990-06-01		2163810		10.1016/0197-2456(90)90009-q
1991	Caron E, Mitchell C.	Her only chance	1892163	USA (MA)	Resource allocation	Essay	1	1	1		1			Dilemmas regarding ECMO indication show us that prognostication is necessarily subject to error, and make us understand how to avoid overconfidence in our ability to judge accurately. Moreover, they highlight our responsibility to collect data about the actual outcomes, harms and benefits, so that we can improve our predictions based on experience and thereby avoid similar dilemmas in the future.	Caron E, Mitchell C.	Am J Nurs. 1991 Sep;91(9):19-20.	Caron E	Am J Nurs	1991-09-01		1892163
1991	Elliott SJ.	Neonatal extracorporeal membrane oxygenation: how not to assess novel technologies	1671482	USA (TX)	Trials and evidence	Essay	1	1	1					In spite of what many paediatricians believe, neonatal ECMO is not a proven therapy. Instead, it is a sad example of how irrational motives caused by early benefits in inadequately designed studies overpower reason (critique of Lantos et al.).	Elliott SJ.	Lancet. 1991 Feb 23;337(8739):476-8. doi: 10.1016/0140-6736(91)93406-y.	Elliott SJ	Lancet	1991-02-23		1671482		10.1016/0140-6736(91)93406-y
1991	Wiser LC, Miké V, Krauss AN, Ross GS, Karl TR, Frader J, Lantos J	Extracorporeal membrane oxygenation in neonates	1997860	Canada, USA (NY), USA (PA), USA (IL), Australia	Trials and evidence	Letter	1	1	1		1			A commentary on Frader et al. and their reply. New medical technologies such as ECMO should not be accepted without randomised and controlled studies (Wiser). We need not adhere to Frader’s and Lantos’ extreme position concerning the role of RCT in scientific evidence in order to believe that more could be done in the assessment of medical technology (Miké, Krauss, Ross). RCT do not answer all qu…		N Engl J Med. 1991 Mar 21;324(12):849-50. doi: 10.1056/NEJM199103213241213.		N Engl J Med	1991-03-21		1997860		10.1056/NEJM199103213241213
1993	Mike V, Krauss AN, Ross GS.	Neonatal extracorporeal membrane oxygenation (ECMO): clinical trials and the ethics of evidence	8308876	USA (NY)	Trials and evidence	Essay	1	1	1					ECMO and other complex medical technical innovations are necessarily linked to questions of scientific (un-)certainty, which can be addressed and probably solved by the concept of the “ethics of evidence”. This concept encourages seeking the best (statistical) evidence and deliberation about the remaining uncertainty through the inclusion of interdisciplinarity, and the involvement of patients, p…	Mike V, Krauss AN, Ross GS.	J Med Ethics. 1993 Dec;19(4):212-8. doi: 10.1136/jme.19.4.212.	Mike V	J Med Ethics	1993-12-01	PMC1376341	8308876		10.1136/jme.19.4.212
1993	Rosenberger WF, Lachin JM.	The use of response-adaptive designs in clinical trials	8119063	USA (MD)	Trials and evidence	Essay	1	1	1					Ethics should be weighed against scientific gain. If an adaptive trial could be conducted without losses of statistical validity, then ethical considerations could demand their use. This should be possible in practice.	Rosenberger WF, Lachin JM.	Control Clin Trials. 1993 Dec;14(6):471-84. doi: 10.1016/0197-2456(93)90028-c.	Rosenberger WF	Control Clin Trials	1993-12-01		8119063		10.1016/0197-2456(93)90028-c
1994	Campbell TG.	Changing criteria for the artificial lung. Historic controls on the technology of ECMO	8003747	Canada	Trials and evidence	Review	1	1	0		1			A historical review of the development of ECMO is presented as an example for the introduction of unvalidated technology in research and clinical medicine. Controversies were not necessarily based in technological innovations. Study cohorts matched with historical patients also remained controversial. Prior to the evaluation of costs, a careful analysis of quality of life and life expectancy shou…	Campbell TG.	ASAIO J. 1994 Apr-Jun;40(2):109-20.	Campbell TG	ASAIO J	1994-04-01		8003747
1994	Elbourne D, Grant A, Field D.	ECMO	8083873	UK	Trials and evidence	Letter	1	1	1					The authors’ experience proves the possibility of RCT in ECMO, as proposed by Miké et al.	Elbourne D, Grant A, Field D.	J Med Ethics. 1994 Jun;20(2):127. doi: 10.1136/jme.20.2.127.	Elbourne D	J Med Ethics	1994-06-01	PMC1376452	8083873		10.1136/jme.20.2.127
1994	Gamulka BD.	Ethical uncertainty: an approach to decisions involving extracorporeal membrane oxygenation	8313270	Canada	Resource allocation	Essay	1	1	1					Good evidence in ECMO is missing, and the prospect of well-designed ECMO-trials seems unlikely. Therefore an individualised, comprehensive approach, based on professional responsibility, time, constant re-evaluation and communication that takes into account the sanctity-of-life and quality-of-life principles might be the best way of dealing with this problem of factual and ethical uncertainty.	Gamulka BD.	CMAJ. 1994 Feb 15;150(4):565-8.	Gamulka BD	CMAJ	1994-02-15	PMC1486293	8313270
1995	Field D.	Ethics of consent for babies in randomised clinical trials. The Steering Committee of the Collaborative UK ECMO Trial	7619150	UK	Trials and evidence	Commentary	1	1	1					Parental informed consent should be obtained in studies involving neonatal intensive care. However, trust in the doctors and study investigators is important. Correspondingly, professionals and parent groups also prefer informed prior consent to written consent.	Field D.	Lancet. 1995 May 27;345(8961):1370.	Field D	Lancet	1995-05-27		7619150
1995	McCormick MC.	Ethics of consent for babies in randomised clinical trials	7752779	USA (MA)	Trials and evidence	Commentary	1	1	1					In respect of the experiences with the Zelen procedure in the US, this adaptive study design should not be used. It has been criticised by the US authorities (commentary on the editorial above).	McCormick MC.	Lancet. 1995 May 27;345(8961):1370-1.	McCormick MC	Lancet	1995-05-27		7752779
1995	TheLancet	Your baby is in a trial	7898222	Not available	Trials and evidence	Editorial	1	1	1		1			Subspecialised experts, hesitant ethics committees, legal issues aimed at protecting the institution or investigator rather than a study’s patients and their parents may all contribute to a lower than expected participation in these studies and to the patients’ loss of trust in the treating doctors.		Lancet. 1995 Apr 1;345(8953):805-6.		Lancet	1995-04-01		7898222
1996	Paris JJ, Schreiber MD.	Physicians' refusal to provide life-prolonging medical interventions	8884127	USA (MA), USA (IL)	Resource allocation	Essay	1	1	1					Historical examples of the problematic handling of limiting medical care situations show that the focus of the debate should not be on either unilateral responsibility or the somehow unclear meaning of the term “medical futility”, but the moral basis of physicians’, patients’, proxies’ and the general and medical community’s actions. The responsibility of physicians as experts should be reassesse…	Paris JJ, Schreiber MD.	Clin Perinatol. 1996 Sep;23(3):563-71.	Paris JJ	Clin Perinatol	1996-09-01		8884127
1997	Lantos JD.	Was the UK collaborative ECMO trial ethical?	11644992	USA (KA)	Trials and evidence	Commentary	1	1						The nature of statistical evidence necessarily requires an evaluation of and decision regarding whether the interventions studied were effective and beneficial. This also applies to ECMO. Evidence is not dichotomic in a way that requires RCT, which could be limited by practical or ethical reasons, as is the case in ECMO.	Lantos JD.	Paediatr Perinat Epidemiol. 1997 Jul;11(3):264-8. doi: 10.1111/j.1365-3016.1997.tb00003.x.	Lantos JD	Paediatr Perinat Epidemiol	1997-07-01		11644992		10.1111/j.1365-3016.1997.tb00003.x
1999	Allmark P.	Should Zelen pre-randomised consent designs be used in some neonatal trials?	10461596	UK	Trials and evidence	Essay	1	1	1					Zelen’s adaptive study design might help overcome some distress when the volunteers are denied the choice of treatment possibilities, as in ECMO, but nor should it imply an overselling of allocated treatment, a broaching of study subjects or a bypassing of clear, informative communication, since, other things being equal, the patients’ free choice always takes precedence over paternalism.	Allmark P.	J Med Ethics. 1999 Aug;25(4):325-9. doi: 10.1136/jme.25.4.325.	Allmark P	J Med Ethics	1999-08-26	PMC479242	10461596		10.1136/jme.25.4.325
1999	Steinhorn DM.	Termination of extracorporeal membrane oxygenation for cardiac support	10564310	USA (NY)	Resource allocation	Essay	1	1	1					As physicians, it is critically important to provide an open, clear and non-judgemental environment for families to make decisions regarding ECMO withdrawal. Most physicians agree on Beauchamp’s and Childress’ ethical principles, and therefore these are a good starting point for discussion. They lead to the obligation of good communicative practice, the acceptance of the sovereignty of the concep…	Steinhorn DM.	Artif Organs. 1999 Nov;23(11):1026-30. doi: 10.1046/j.1525-1594.1999.06445.x.	Steinhorn DM	Artif Organs	1999-11-24		10564310		10.1046/j.1525-1594.1999.06445.x
2002	Fawke J, McIntyre J.	Recent advances in neonatology	11914692	UK	Resource allocation	Review	1	1	1				1	Due to newer therapeutic alternatives, infants requiring ECMO are getting sicker. Despite this, mortality for infants on ECMO has remained static. End-of-life decisions vary significantly between countries.	Fawke J, McIntyre J.	Curr Opin Obstet Gynecol. 2002 Apr;14(2):153-8. doi: 10.1097/00001703-200204000-00008.	Fawke J	Curr Opin Obstet Gynecol	2002-03-27		11914692		10.1097/00001703-200204000-00008
2005	Wolfson RK, Kahana MD, Nachman JB, Lantos J.	Extracorporeal membrane oxygenation after stem cell transplant: clinical decision-making in the absence of evidence	15730609	USA (IL)	Trials and evidence	Case Report	1	1	1					The described case shows the ethical imperative to consider therapies that may be appropriate even without evidence predictive of success, to have entry criteria and treatment protocols for such therapies, and to collect data from such experiences to advance the standard of care.	Wolfson RK, Kahana MD, Nachman JB, Lantos J.	Pediatr Crit Care Med. 2005 Mar;6(2):200-3. doi: 10.1097/01.PCC.0000155635.02240.9C.	Wolfson RK	Pediatr Crit Care Med	2005-02-26		15730609		10.1097/01.PCC.0000155635.02240.9C
2006	Dejohn C, Zwischenberger JB.	Ethical implications of extracorporeal interval support for organ retrieval (EISOR)	16557095	USA (TX)	EISOR	Editorial	1	1	1		1			Although EISOR appears promising in terms of improving the outcome of non-heart-beating organ donation, it also means new challenges relating to the donor’s dignity and the ethical difference between pre- and postmortem interventions.	Dejohn C, Zwischenberger JB.	ASAIO J. 2006 Mar-Apr;52(2):119-22. doi: 10.1097/01.mat.0000206486.80829.58.	Dejohn C	ASAIO J	2006-03-25		16557095		10.1097/01.mat.0000206486.80829.58
2007	Shemie SD.	Clarifying the paradigm for the ethics of donation and transplantation: was 'dead' really so clear before organ donation?	17718918	Canada	EISOR	Commentary	1	1	1					Biological death is a process, the onset of which is not and has never been clearly distinguishable from life. In medical practice and law, the use of the absence of autoresuscitation after two minutes of cardiac arrest as a mark of the irreversible loss of brain function and personhood should be – ceteris paribus – sufficient and more adequate than other concepts of death. Criticism of the dead …	Shemie SD.	Philos Ethics Humanit Med. 2007 Aug 24;2:18. doi: 10.1186/1747-5341-2-18.	Shemie SD	Philos Ethics Humanit Med	2007-08-28	PMC2048971	17718918		10.1186/1747-5341-2-18
2008	Bernat JL.	The boundaries of organ donation after circulatory death	18703467	USA (NH)	EISOR	Commentary	1	1	1					Organ donation after circulatory death has become mainstream in the United States. There is an inborn risk of patients’ decisions regarding withholding life-sustaining treatment being driven by the need for organs, and therefore these two aspects should be strictly separated. The standard of care should be equal for both. It is discussed whether EISOR violates the dead donor rule. Setting prudent…	Bernat JL.	N Engl J Med. 2008 Aug 14;359(7):669-71. doi: 10.1056/NEJMp0804161.	Bernat JL	N Engl J Med	2008-08-16		18703467		10.1056/NEJMp0804161
2008	Worrall J.	Evidence and ethics in medicine	18723945	UK	Trials and evidence	Case report	1	1						In medical science and practice, ethics and epistemology influence and presuppose each other in both directions, hence an informed view on both ethics and evidence is required in order to decide rationally and rightly.	Worrall J.	Perspect Biol Med. 2008 Summer;51(3):418-31. doi: 10.1353/pbm.0.0040.	Worrall J	Perspect Biol Med	2008-08-30		18723945		10.1353/pbm.0.0040
2009	Crow S, Fischer AC, Schears RM.	Extracorporeal life support: utilization, cost, controversy, and ethics of trying to save lives	19713206	USA (MN), USA (TX)	Resource allocation	Review	1	1	1		1			ECMO is efficient for some patients, although the costs require a thorough evaluation of the treatment’s appropriateness. Ethics depend on knowledge, preferably evidence-based from RCT, which the expert community considers the gold standard. However, open-mindedness in regard to not yet approved medical innovations is the true ethical imperative.	Crow S, Fischer AC, Schears RM.	Semin Cardiothorac Vasc Anesth. 2009 Sep;13(3):183-91. doi: 10.1177/1089253209347385. Epub 2009 Aug 26.	Crow S	Semin Cardiothorac Vasc Anesth	2009-08-29		19713206		10.1177/1089253209347385
2009	Verheijde JL, Rady MY, McGregor J.	Presumed consent for organ preservation in uncontrolled donation after cardiac death in the United States: a public policy with serious consequences	19772617	USA (AZ)	EISOR	Review	1	1	1					Organ donation after cessation of circulation and respiration, both controlled and uncontrolled, is ethically problematic because of the absence of agreement on criteria for declaring death, other than brain-death, and the absence of reliable tests to confirm such criteria. Neither permanence nor irreversibility can be empirically determined – they are rather symptoms than a cause. ECMO could con…	Verheijde JL, Rady MY, McGregor J.	Philos Ethics Humanit Med. 2009 Sep 22;4:15. doi: 10.1186/1747-5341-4-15.	Verheijde JL	Philos Ethics Humanit Med	2009-09-24	PMC2757028	19772617		10.1186/1747-5341-4-15
2010	Bernat JL, Capron AM, Bleck TP, Blosser S, Bratton SL, Childress JF, DeVita MA, Fulda GJ, Gries CJ, Mathur M, Nakagawa TA, Rushton CH, Shemie SD, White DB.	The circulatory-respiratory determination of death in organ donation	20124892	USA (NH) USA (CA), USA (IL), USA (PA), USA (UT), USA (VA), USA (DE), USA (WA), USA (NC), USA (MD), Canada	EISOR	Essay	1	1	1					The panel, convened with support from the US Health Resources and Services Administration Division of Transplantation, concludes that the permanence criterion of death satisfies the US Uniform Determination of Death Act, since it is congruent with the general medical standard and practice. It should refer to circulatory rather than to cardiac death, which also respects the dead donor rule. ECMO s…	Bernat JL, Capron AM, Bleck TP, Blosser S, Bratton SL, Childress JF, DeVita MA, Fulda GJ, Gries CJ, Mathur M, Nakagawa TA, Rushton CH, Shemie SD, White DB.	Crit Care Med. 2010 Mar;38(3):963-70. doi: 10.1097/CCM.0b013e3181c58916.	Bernat JL	Crit Care Med	2010-02-04		20124892		10.1097/CCM.0b013e3181c58916
2010	Bluhm R.	The epistemology and ethics of chronic disease research: further lessons from ECMO	20333473	USA (VA)	Trials and evidence	Essay	1	1	1					In line with Robert Truog, the author suggests that observational studies from large registers should complement RCT, especially in the case of rare circumstances and fatal outcomes, as in ECMO. RCT always imply a trade-off between internal homogeneity and external heterogeneity, whereas observational studies generally add complexity to science.	Bluhm R.	Theor Med Bioeth. 2010 Apr;31(2):107-22. doi: 10.1007/s11017-010-9139-8.	Bluhm R	Theor Med Bioeth	2010-03-25		20333473		10.1007/s11017-010-9139-8
2010	DeLaney E, Smith MJ, Harvey BT, Pelletier KJ, Aquino MP, Stone JM, Jean-Baptiste GC, Johnson JH.	Extracorporeal life support for pandemic influenza: the role of extracorporeal membrane oxygenation in pandemic management	21313924	USA (NY)	Resource allocation	Review	1	1						Experienced ECMO centres should be centres for ECLS intervention during the pandemic. At the same time, reimbursement incentives should motivate other hospitals and healthcare professionals to maintain proven existing technologies while focusing on the patients’ safety. This is particularly necessary in countries without public health insurance. In a disaster, when demand exceeds resources, the a…	DeLaney E, Smith MJ, Harvey BT, Pelletier KJ, Aquino MP, Stone JM, Jean-Baptiste GC, Johnson JH.	J Extra Corpor Technol. 2010 Dec;42(4):268-80.	DeLaney E	J Extra Corpor Technol	2011-02-15	PMC4680015	21313924
2010	Halpern SD, Truog RD.	Organ donors after circulatory determination of death: not necessarily dead, and it does not necessarily matter	20168173	USA (PA), USA (MA)	EISOR	Editorial	1	1	1					Organ donation after circulatory determination of death, incorporating the dead donor rule, presupposes the reliability of the concepts of irreversibility or permanence, which cannot be guaranteed. However, organ donation does actually not require the determination of death, and therefore satisfaction of the dead donor rule, as long the donation is the autonomous wish of the donor.	Halpern SD, Truog RD.	Crit Care Med. 2010 Mar;38(3):1011-2. doi: 10.1097/CCM.0b013e3181cc1228.	Halpern SD	Crit Care Med	2010-02-20		20168173		10.1097/CCM.0b013e3181cc1228
2010	Kissoon N, Bohn D.	Use of extracorporeal technology during pandemics: ethical and staffing considerations	21057269	Canada	Resource allocation	Essay	1	1	1					Where knowledge of paediatric mass critical care is limited, ECMO can be a reasonable option, but may also be problematic due to limited resources. Therefore, a rationing plan based on a sound ethical framework should always be provided.	Kissoon N, Bohn D.	Pediatr Crit Care Med. 2010 Nov;11(6):757-8. doi: 10.1097/PCC.0b013e3181e288a4.	Kissoon N	Pediatr Crit Care Med	2010-11-09		21057269		10.1097/PCC.0b013e3181e288a4
2010	Strueber M.	Extracorporeal support as a bridge to lung transplantation	19952734		Resource allocation	Review	1	1						ECLS in lung transplantation leads to questions of just transplant allocation and the balancing of waiting list mortality against post-transplant survival.	Strueber M.	Curr Opin Crit Care. 2010 Feb;16(1):69-73. doi: 10.1097/MCC.0b013e3283353ce0.	Strueber M	Curr Opin Crit Care	2009-12-03		19952734		10.1097/MCC.0b013e3283353ce0
2011	Geraci PM, Sepe V.	Non-heart-beating organ donation in Italy	21617625	Italy	EISOR	Review	1	1						The declaration of death and the evaluation of a potential donor should be separated. The rights of both the living and the dead should be respected. Post-mortem splanchnic perfusion by ECMO does not annul the determination of the donor’s death. When breaking bad news, a request for organ donation should not be included.	Geraci PM, Sepe V.	Minerva Anestesiol. 2011 Jun;77(6):613-23.	Geraci PM	Minerva Anestesiol	2011-05-28		21617625
2012	Mavroudis C, Mavroudis CD, Green J, Sade RM, Jacobs JP, Kodish E.	Ethical considerations for post-cardiotomy extracorporeal membrane oxygenation	23331602	USA (FL), USA (PA), USA (SC), USA (OH)	Resource allocation	Review	1	1	1					ECMO reimbursement varies among institutions and countries. The early use of ECMO may help to reduce overall hospital costs. Moral risks of ECMO centre around the selection process, informed consent, decision-making and the maintenance of ECMO. There is no standard of informed consent in ECMO. It is an ongoing process rather than a single event, and as such it is important to balance clinical dat…	Mavroudis C, Mavroudis CD, Green J, Sade RM, Jacobs JP, Kodish E.	Cardiol Young. 2012 Dec;22(6):780-6. doi: 10.1017/S1047951112001540.	Mavroudis C	Cardiol Young	2013-01-22		23331602		10.1017/S1047951112001540
2012	Preston TJ, Olshove VF Jr, Chase M.	Bloodless extracorporeal membrane oxygenation in the Jehovah's Witness patient	22730863	USA (OH)	Resource allocation	Case report	1	1		1				A successful case of a non-transfused adolescent Jehovah’s Witness patient who spent 14 days on ECMO is presented as an example of a good deliberation process between professionals and the patient’s family, in which the family’s wishes were respected without promises being made.	Preston TJ, Olshove VF Jr, Chase M.	J Extra Corpor Technol. 2012 Mar;44(1):39-42.	Preston TJ	J Extra Corpor Technol	2012-06-27	PMC4557438	22730863
2013	Glannon W.	The moral insignificance of death in organ donation	23507181	Canada	EISOR	Essay	1	1	1					Death and the dead donor rule are neither necessary nor sufficient to protect organ donors from harm. Rather, what matters is respect for autonomous consent, the irreversibility of the patient’s condition and the absence of pain and suffering. The concept of permanence in organ donation after circulatory death is problematic due to physicians’ influence on the determination of death.	Glannon W.	Camb Q Healthc Ethics. 2013 Apr;22(2):192-202. doi: 10.1017/S0963180112000564.	Glannon W	Camb Q Healthc Ethics	2013-03-20		23507181		10.1017/S0963180112000564
2013	Neyrinck A, Van Raemdonck D, Monbaliu D.	Donation after circulatory death: current status	23632566	Belgium	EISOR	Review	1	1						Ethical issues in EISOR relate to the conflict between the donor’s harm and the recipient’s claim on grafts of good quality, the risk of hastening death, the uncertainty of the method and the timing of the determination of death. Standardising guidelines were missing but under development.	Neyrinck A, Van Raemdonck D, Monbaliu D.	Curr Opin Anaesthesiol. 2013 Jun;26(3):382-90. doi: 10.1097/ACO.0b013e328360dc87.	Neyrinck A	Curr Opin Anaesthesiol	2013-05-02		23632566		10.1097/ACO.0b013e328360dc87
2013	Schwartz SM, Schmidt A.	Medical and nursing care of the child on mechanical circulatory support	23735985	Canada, USA (AZ)	Resource allocation	Review	1	1	1					Decisions about discontinuing ECMO are usually ethically difficult. It is therefore important to involve all relevant parts in the decision-making process at an early stage. Sufficient palliative care and staff and proxy debriefings may be helpful.	Schwartz SM, Schmidt A.	Pediatr Crit Care Med. 2013 Jun;14(5 Suppl 1):S43-50. doi: 10.1097/PCC.0b013e318292dfdc.	Schwartz SM	Pediatr Crit Care Med	2013-06-06		23735985		10.1097/PCC.0b013e318292dfdc
2014	Abrams D, Combes A, Brodie D.	What's new in extracorporeal membrane oxygenation for cardiac failure and cardiac arrest in adults?	24474528	USA (NY), France	Resource allocation	Review	1	1	1					Physicians should be aware of the economically appropriate and clinically beneficial use of ECPR.	Abrams D, Combes A, Brodie D.	Intensive Care Med. 2014 Apr;40(4):609-12. doi: 10.1007/s00134-014-3212-0. Epub 2014 Jan 29.	Abrams D	Intensive Care Med	2014-01-30		24474528		10.1007/s00134-014-3212-0
2014	Abrams DC, Prager K, Blinderman CD, Burkart KM, Brodie D.	Ethical dilemmas encountered with the use of extracorporeal membrane oxygenation in adults	24687709	USA (NY)	Resource allocation	Essay	1	1	1					The expansive use of ECMO worldwide and the lack of data call for a comprehensive development of the ethics in society. Although the comparability of withholding and withdrawal of life-sustaining therapy is a generally accepted ethical principle, it is not always applicable on ECMO, e.g. when the patient is awake. His or her decision concerning the withdrawal should be respected. However, the sam…	Abrams DC, Prager K, Blinderman CD, Burkart KM, Brodie D.	Chest. 2014 Apr;145(4):876-882. doi: 10.1378/chest.13-1138.	Abrams DC	Chest	2014-04-02		24687709		10.1378/chest.13-1138
2014	Baker A, Shemie SD.	Biophilosophical basis for identifying the death of a person	24930370	Canada	EISOR	Essay	1	1	1					The capacity for consciousness and self-awareness is the only irreplaceable emergent phenomenon – arising from physiologic function of the brain – that is necessary and sufficient to define the life of a person.	Baker A, Shemie SD.	J Crit Care. 2014 Aug;29(4):687-9. doi: 10.1016/j.jcrc.2014.04.013. Epub 2014 Apr 29.	Baker A	J Crit Care	2014-06-17		24930370		10.1016/j.jcrc.2014.04.013
2014	Chen YY, Chen L, Kao YH, Chu TS, Huang TS, Ko WJ.	The over-optimistic portrayal of life-supporting treatments in newspapers and on the Internet: a cross-sectional study using extra-corporeal membrane oxygenation as an example	25081491	Taiwan	Resource allocation	Empirical study	1	1	1	1	1			Taiwanese newspapers and Chinese websites portray the outcome of ECMO in an over-optimistic manner. Since a large proportion of the Taiwanese population read these media, they may be influenced to have non-realistic expectations of ECMO and request outcomes based on a wrong foundation.	Chen YY, Chen L, Kao YH, Chu TS, Huang TS, Ko WJ.	BMC Med Ethics. 2014 Aug 1;15:59. doi: 10.1186/1472-6939-15-59.	Chen YY	BMC Med Ethics	2014-08-02	PMC4137104	25081491		10.1186/1472-6939-15-59
2014	Cronin AJ.	End-of-life care in advanced kidney disease: ethical and legal issues and key challenges for black and minority ethnic groups	25185488	UK	Resource allocation	Essay	0	1	1		1			Not all life should be sustained. The patient’s individual, subjective perspective on quality should be in focus. Two key theoretical ethical principles underpin end-of-life care: the sanctity of life and autonomy, which can be conflicting. Informed decision-making is crucial, and presupposes the patient’s cognitive capacity to use the information given. Where this capacity is lacking, those acti…	Cronin AJ.	J Ren Care. 2014 Sep;40 Suppl 1:16-22. doi: 10.1111/jorc.12082.	Cronin AJ	J Ren Care	2014-09-05		25185488		10.1111/jorc.12082
2014	Del Sorbo L, Cypel M, Fan E.	Extracorporeal life support for adults with severe acute respiratory failure	24503270	UK	Trials and evidence	Review	1	1	1		1		1	The long recovery period on ECMO after ARDS makes it difficult to determine whether the injury is irreversible or when patients should be considered for transplantation. Evidence regarding pathophysiology and long-term outcomes is missing.	Del Sorbo L, Cypel M, Fan E.	Lancet Respir Med. 2014 Feb;2(2):154-64. doi: 10.1016/S2213-2600(13)70197-8. Epub 2013 Oct 17.	Del Sorbo L	Lancet Respir Med	2014-02-08		24503270		10.1016/S2213-2600(13)70197-8
2014	Hayes D Jr, Black SM, Whitson BA.	Extracorporeal membrane oxygenation in pediatric organ donation	24931455	USA (OH)	EISOR	Letter to the editor	1	1	1					There is still some controversy and geographical variation concerning the use of EISOR, which is unconducive to the solution of the organ shortage in transplantation and also contradicts patient autonomy. Therefore, current policies should be explicit about the possibility of ECMO in the case of organ donation.	Hayes D Jr, Black SM, Whitson BA.	Pediatr Transplant. 2014 Aug;18(5):549-50. doi: 10.1111/petr.12304. Epub 2014 Jun 14.	Hayes D Jr	Pediatr Transplant	2014-06-17		24931455		10.1111/petr.12304
2014	Hoehn KS.	Posttraumatic stress and technology: do extracorporeal membrane oxygenation programs have an ethical obligation to provide ongoing psychological support for parents?	24492190	US (KS)	Resource allocation	Commentary	1	1						Due to the high prevalence of posttraumatic stress symptoms in parents of infants who survive ECMO, it is an ethical imperative for professionals to address this impact of ECMO.	Hoehn KS.	Pediatr Crit Care Med. 2014 Feb;15(2):180-1. doi: 10.1097/PCC.0000000000000045.	Hoehn KS	Pediatr Crit Care Med	2014-02-05		24492190		10.1097/PCC.0000000000000045
2014	Meltzer EC, Ivascu NS, Acres CA, Stark M, Furman RR, Fins JJ.	Extracorporeal membrane oxygenation as a bridge to chemotherapy in an Orthodox Jewish patient	25096998	US (NY)	Resource allocation	Case report	1	1	1					The case of a Jewish patient shows how pre-emptive ethical deliberation between professionals, proxies and clerics can mitigate distress in the planning of ECMO discontinuation.	Meltzer EC, Ivascu NS, Acres CA, Stark M, Furman RR, Fins JJ.	Oncologist. 2014 Sep;19(9):985-9. doi: 10.1634/theoncologist.2014-0025. Epub 2014 Aug 5.	Meltzer EC	Oncologist	2014-08-07	PMC4153457	25096998		10.1634/theoncologist.2014-0025
2014	Meltzer EC, Ivascu NS, Acres CA, Stark M, Kirkpatrick JN, Paul S, Sedrakyan A, Fins JJ.	Extracorporeal membrane oxygenation in adults: a brief review and ethical considerations for nonspecialist health providers and hospitalists	25332093	USA (NY), USA (PA)	Resource allocation	Essay	1	1	1					Decisions regarding ECMO require ongoing dialogical ascertainment of the patient’s consent if possible, or, when incapacitated, the assistance of a patient-designated agent, official guardian, a spouse, an adult child, a parent, a sibling or other relatives, in an empathic and anticipating way. The course should be re-evaluated frequently, in a way that balances goals and burdens.	Meltzer EC, Ivascu NS, Acres CA, Stark M, Kirkpatrick JN, Paul S, Sedrakyan A, Fins JJ.	J Hosp Med. 2014 Dec;9(12):808-13. doi: 10.1002/jhm.2262. Epub 2014 Oct 21.	Meltzer EC	J Hosp Med	2014-10-22		25332093		10.1002/jhm.2262
2014	Rojas-Peña A, Sall LE, Gravel MT, Cooley EG, Pelletier SJ, Bartlett RH, Punch JD.	Donation after circulatory determination of death: the university of michigan experience with extracorporeal support	24825520	US (MI)	EISOR	Review	1	1						The roles of the treating and harvesting physician – as in DNDD – should be strictly separated. Good and prompt communication among professionals and between professionals and relatives should be mandatory.	Rojas-Peña A, Sall LE, Gravel MT, Cooley EG, Pelletier SJ, Bartlett RH, Punch JD.	Transplantation. 2014 Aug 15;98(3):328-34. doi: 10.1097/TP.0000000000000070.	Rojas-Peña A	Transplantation	2014-05-15		24825520		10.1097/TP.0000000000000070
2014	Shankar V, Costello JP, Peer SM, Klugman D, Nath DS.	Ethical dilemma: offering short-term extracorporeal membrane oxygenation support for terminally ill children who are not candidates for long-term mechanical circulatory support or heart transplantation	24668981	USA (DC)	Resource allocation	Case report	1	1	1					The use of ECMO in terminally ill paediatric patients who are not candidates for long-term mechanical circulatory support or heart transplantation is a reality in critical care, and requires careful deliberation, balancing futility, patient and proxy wishes and best interests in a multidisciplinary approach, with the patient’s actual and eventual quality of life at the centre.	Shankar V, Costello JP, Peer SM, Klugman D, Nath DS.	World J Pediatr Congenit Heart Surg. 2014 Apr;5(2):311-4. doi: 10.1177/2150135113509820.	Shankar V	World J Pediatr Congenit Heart Surg	2014-03-27		24668981		10.1177/2150135113509820
2014	Shemie SD, Baker A.	Where have we been? Where are we going? Initiatives to improve uniformity of policies, integrity of practice, and improve understanding of brain death within the global medical community and lay public	25201431	Canada	EISOR	Essay	1	1	1					ECMO has changed our understanding of human viability and personhood. However, abandoning the dead donor rule may jeopardise public trust in modern medicine. Although there is emerging acceptance of the fact that death occurs only through the loss of brain function, further research about donation after circulatory death and the role of brain function herein is needed. There should be an internat…	Shemie SD, Baker A.	J Crit Care. 2014 Dec;29(6):1114-6. doi: 10.1016/j.jcrc.2014.08.007. Epub 2014 Aug 15.	Shemie SD	J Crit Care	2014-09-10		25201431		10.1016/j.jcrc.2014.08.007
2014	Wall SP, Munjal KG, Dubler NN, Goldfrank LR; NYC uDCDD Study Group.	Uncontrolled organ donation after circulatory determination of death: US policy failures and call to action	24268427	USA (NY)	EISOR	Essay	1	1	1					Evidence from several countries suggests that uncontrolled donation after circulatory determination of death (uDCDD) is feasible. After 30 min of unsuccessful resuscitation and 5 min “hands-off”, a given situation must be declared futile. Death can be assessed based on the concept of the irreversible cessation of circulatory and respiratory functions, as evidenced by the persistent cessation of t…	Wall SP, Munjal KG, Dubler NN, Goldfrank LR; NYC uDCDD Study Group.	Ann Emerg Med. 2014 Apr;63(4):392-400. doi: 10.1016/j.annemergmed.2013.10.014. Epub 2013 Nov 20.	Wall SP	Ann Emerg Med	2013-11-26		24268427		10.1016/j.annemergmed.2013.10.014
2015	Balsorano P, Ciapetti M, Cianchi G, Bonizzoli M, Migliaccio ML, Ferraro MC, Franci A, Peris A.	Extracorporeal life support and multiorgan donation in a severe polytrauma patient: A case report	25756801	Italy	EISOR	Case report	1	1		1	1			A case of EISOR in a polytrauma patient is presented. The use of ECMO in a context of brain-dead diagnostics could be seen as a tool for organ preservation, rather than patient support. This may leave a grey area of divergent interests.	Balsorano P, Ciapetti M, Cianchi G, Bonizzoli M, Migliaccio ML, Ferraro MC, Franci A, Peris A.	Int J Surg Case Rep. 2015;9:109-11. doi: 10.1016/j.ijscr.2015.02.054. Epub 2015 Mar 4.	Balsorano P	Int J Surg Case Rep	2015-03-11	PMC4392376	25756801		10.1016/j.ijscr.2015.02.054
2015	Bein T, Weber-Carstens S, Herridge M.	Extracorporeal life support, ethics, and questions at the bedside: how does the end of the pathway look?	25711471	GER, Canada	Resource allocation	Essay	1	1	1		1			The goal of ECMO (bridge to recovery, guarantee of the status quo or prohibition of dying?) should be reflected on using an integrative approach including professionals and proxies.	Bein T, Weber-Carstens S, Herridge M.	Intensive Care Med. 2015 Sep;41(9):1714-5. doi: 10.1007/s00134-015-3696-2. Epub 2015 Feb 25.	Bein T	Intensive Care Med	2015-02-26		25711471		10.1007/s00134-015-3696-2
2015	Geiger JD, Hirschl RB.	Innovation in surgical technology and techniques: Challenges and ethical issues	25976146	USA (MI)	Trials and evidence	Commentary	1	1	1					ECMO-technology may be used in the grey zone between research and individual off-label use. Ethical conflicts may then be minimised by obtaining the patient’s informed consent, by involving skilled practitioners, and by the use of registries and formal research as early as possible.	Geiger JD, Hirschl RB.	Semin Pediatr Surg. 2015 Jun;24(3):115-21. doi: 10.1053/j.sempedsurg.2015.02.008. Epub 2015 Mar 2.	Geiger JD	Semin Pediatr Surg	2015-05-16		25976146		10.1053/j.sempedsurg.2015.02.008
2015	Mancini ME, Diekema DS, Hoadley TA, Kadlec KD, Leveille MH, McGowan JE, Munkwitz MM, Panchal AR, Sayre MR, Sinz EH.	Part 3: Ethical Issues: 2015 American Heart Association Guidelines Update for Cardiopulmonary Resuscitation and Emergency Cardiovascular Care	26472991	USA (TX), USA (WA), USA (IL), USA (NE), USA (PA), USA (AZ), USA (OH)	Resource allocation	Guideline	1	1	1				1	CPR entails a relevant risk of conflict with the patient’s unexpressed preference. The decision about whether or not to initiate/maintain CPR is ideally based on science, law, patient/surrogate preferences, policies and established ethical principles. Informed consent presupposes the patient’s active deliberation. Withholding and withdrawing life-sustaining treatment are ethically equivalent. Whe…	Mancini ME, Diekema DS, Hoadley TA, Kadlec KD, Leveille MH, McGowan JE, Munkwitz MM, Panchal AR, Sayre MR, Sinz EH.	Circulation. 2015 Nov 3;132(18 Suppl 2):S383-96. doi: 10.1161/CIR.0000000000000254.	Mancini ME	Circulation	2015-10-17		26472991		10.1161/CIR.0000000000000254
2015	Ortega-Deballon I, Hornby L, Shemie SD.	Protocols for uncontrolled donation after circulatory death: a systematic review of international guidelines, practices and transplant outcomes	26104293	Canada, Spain	EISOR	Review	1	1	1	0			1	All of the existing guidelines for uncontrolled donation after circulatory death entail ethical issues, especially concerning consent, irreversibility of cardiac arrest, possible re-establishment of oxygenated perfusion of the brain and conflict of interests between resuscitation attempts and organ-preserving attempts. However, the guidelines assess these issues heterogeneously. More standardisat…	Ortega-Deballon I, Hornby L, Shemie SD.	Crit Care. 2015 Jun 24;19(1):268. doi: 10.1186/s13054-015-0985-7.	Ortega-Deballon I	Crit Care	2015-06-25	PMC4495857	26104293		10.1186/s13054-015-0985-7
2015	Peetz AB, Sadovnikoff N, O'Connor MF.	Is informed consent for extracorporeal life support even possible?	25813590	USA (MA), USA (IL)	Resource allocation	Essay	1	1	1		1			ECLS means emergent conditions, limited mental capacity and time, and the use of a drastic, experimental and complex technique, all of which are obstacles to ideal informed consent. Therefore, informed consent for ECLS is typically an unrealistic scenario.	Peetz AB, Sadovnikoff N, O'Connor MF.	AMA J Ethics. 2015 Mar 1;17(3):236-42. doi: 10.1001/journalofethics.2015.17.3.stas1-1503.	Peetz AB	AMA J Ethics	2015-03-28		25813590		10.1001/journalofethics.2015.17.3.stas1-1503
2015	Pujara D, Sandoval E, Simpson L, Mallidi HR, Singh SK.	The State of the Art in Extracorporeal Membrane Oxygenation	26074105	US (TX)	Resource allocation	Review	1	1					1	The goals of care should be discussed promptly after initiation of ECMO. Relatives should be informed about the typical risks at that time, but there are no ECMO-specific risk scores with which to predict outcomes. Do-not-resuscitate orders are incompatible with the idea of V-A ECMO.	Pujara D, Sandoval E, Simpson L, Mallidi HR, Singh SK.	Semin Thorac Cardiovasc Surg. 2015 Spring;27(1):17-23. doi: 10.1053/j.semtcvs.2015.02.004. Epub 2015 Feb 25.	Pujara D	Semin Thorac Cardiovasc Surg	2015-06-16		26074105		10.1053/j.semtcvs.2015.02.004
2015	Ramanathan K, Cove ME, Caleb MG, Teoh KL, Maclaren G.	Ethical dilemmas of adult ECMO: emerging conceptual challenges	25440649	Singapore	Resource allocation	Essay	1	1	1	1	1			ECMO may present a conflict between medical expertise and patient autonomy, and between quality and sanctity of life. The valuation of quality indicators may differ among individuals, making it difficult to generalise any approach as the “best-interest standard’. Although patients and proxies are at the centre, they should not be in the driver’s seat. Guidelines, clear and repeated information, a…	Ramanathan K, Cove ME, Caleb MG, Teoh KL, Maclaren G.	J Cardiothorac Vasc Anesth. 2015 Feb;29(1):229-33. doi: 10.1053/j.jvca.2014.07.015. Epub 2014 Oct 23.	Ramanathan K	J Cardiothorac Vasc Anesth	2014-12-03		25440649		10.1053/j.jvca.2014.07.015
2015	Riggs KR, Becker LB, Sugarman J.	Ethics in the use of extracorporeal cardiopulmonary resuscitation in adults	25866287	USA (MD), USA (PA)	Resource allocation	Commentary	1	1	1					The individual outcomes of ECPR may be unclear and data are generally poor. In some cases, it may be considered as worse than death. Obtaining consent is difficult, and single prognostic criteria may be misinterpreted. Therefore, further research about the short and the long run after hospitalisation are needed, and should include retro- and prospective randomised trials. Transparent guidelines s…	Riggs KR, Becker LB, Sugarman J.	Resuscitation. 2015 Jun;91:73-5. doi: 10.1016/j.resuscitation.2015.03.021. Epub 2015 Apr 9.	Riggs KR	Resuscitation	2015-04-14	PMC4433606	25866287	NIHMS679805	10.1016/j.resuscitation.2015.03.021
2015	Statter MB.	"Just because you can--doesn't mean you should"	25981276	USA (NY)	Resource allocation	Case report	1	1	1					In neonatal ECMO, there may be a conflict between the infant’s parent and their treating professional. This conflict may be minimised by the medical team’s prior consensus, the incorporation of the goals of ECMO into the best interest analysis of the patient, and an individualised approach with a clear and consistent dialogue.	Statter MB.	Narrat Inq Bioeth. 2015 Spring;5(1):22-4. doi: 10.1353/nib.2015.0014.	Statter MB	Narrat Inq Bioeth	2015-05-19		25981276		10.1353/nib.2015.0014
2015	Truog RD, Thiagarajan RR, Harrison CH.	Ethical dilemmas with the use of ECMO as a bridge to transplantation	26201841	USA (MA)	Resource allocation	Commentary	1	1	1					In the ethical dilemma regarding the withdrawal of ECMO between one position, which advocates for a “hard” withdrawal as soon as the initial goal (e.g. transplantation) is abandoned, and the opposing position, which supports an unlimited course of ECMO as long as there is the experience of quality of life, there might be an alternative path in phasing out the ECMO, e.g. by not replacing a failing…	Truog RD, Thiagarajan RR, Harrison CH.	Lancet Respir Med. 2015 Aug;3(8):597-8. doi: 10.1016/S2213-2600(15)00233-7. Epub 2015 Jul 19.	Truog RD	Lancet Respir Med	2015-07-24		26201841		10.1016/S2213-2600(15)00233-7
2016	Bartlett RH.	Clinical Research in Acute Fatal Illness: Lessons From Extracorporeal Membrane Oxygenation	25223826	USA (MI)	Trials and evidence	Review	1	1	1					Randomised controlled trials in life support are ethically problematic as long as clinical equipoise is not given beforehand. Adaptive study designs minimise, but do not solve this problem. Matched pair designs are therefore the best alternative.	Bartlett RH.	J Intensive Care Med. 2016 Aug;31(7):456-65. doi: 10.1177/0885066614550278. Epub 2014 Sep 15.	Bartlett RH	J Intensive Care Med	2014-09-17		25223826		10.1177/0885066614550278
2016	Buchtele N, Schellongowski P, Bojic A, Hermann A, Robak O, Lamm W, Staudinger T.	Successful weaning from 65-day extracorporeal membrane oxygenation therapy in influenza-associated acute respiratory distress syndrome	27338282	Austria	Resource allocation	Case report	1	1			1			A case of prolonged ECMO run is presented. Although prognostic data for a good outcome are rare, it is suggested that therapy be maintained as long signs of multiorgan failure or irreversible lung injury are absent.	Buchtele N, Schellongowski P, Bojic A, Hermann A, Robak O, Lamm W, Staudinger T.	Int J Artif Organs. 2016 Jul 4;39(5):249-52. doi: 10.5301/ijao.5000501. Epub 2016 Jun 23.	Buchtele N	Int J Artif Organs	2016-06-25		27338282		10.5301/ijao.5000501
2016	Courtwright AM, Robinson EM, Feins K, Carr-Loveland J, Donahue V, Roy N, McCannon J.	Ethics Committee Consultation and Extracorporeal Membrane Oxygenation	27299991	USA (MA)	Resource allocation	Empirical study	1	1	1		1			Routine integration of ethics consultation into the care of ECMO patients shows that most of the ethical questions regarding ECMO resembled traditional concerns about the appropriate use of any life-sustaining treatment, like the uncertainty or disagreement about the state and goals of treatment. However, the metaphor of “bridging” to recovery was more common, whereas sustained conversation was m…	Courtwright AM, Robinson EM, Feins K, Carr-Loveland J, Donahue V, Roy N, McCannon J.	Ann Am Thorac Soc. 2016 Sep;13(9):1553-8. doi: 10.1513/AnnalsATS.201511-757OC.	Courtwright AM	Ann Am Thorac Soc	2016-06-15	PMC5059495	27299991		10.1513/AnnalsATS.201511-757OC
2016	Dalle Ave AL, Gardiner D, Shaw DM.	The ethics of extracorporeal membrane oxygenation in brain-dead potential organ donors	26987689	Switzerland, UK	EISOR	Essay	1	1	1		1			ECLS should be considered for unstable brain‐dead potential organ donors, in order to save organs that would otherwise be lost. The donor should be declared brain-dead prior to ECLS and should have given consent (alternatively, surrogate consent). In cases where brain death occurs during ECLS, there is little additional ethical concern regarding its ongoing use. One should consider the possible h…	Dalle Ave AL, Gardiner D, Shaw DM.	Transpl Int. 2016 May;29(5):612-8. doi: 10.1111/tri.12772.	Dalle Ave AL	Transpl Int	2016-03-19		26987689		10.1111/tri.12772
2016	Dalle Ave AL, Shaw DM, Bernat JL.	Ethical Issues in the Use of Extracorporeal Membrane Oxygenation in Controlled Donation After Circulatory Determination of Death	26999771	Switzerland, USA (NH)	EISOR	Commentary	1	1	1		1			EISOR can encumber end‐of‐life care, revive the declared dead, inflict physical harm on the patient and cause distress for the family and professionals. Until pre- or postmortem ECMO is shown to improve future graft outcome, other techniques should be preferred, because they avoid ethical issues.	Dalle Ave AL, Shaw DM, Bernat JL.	Am J Transplant. 2016 Aug;16(8):2293-9. doi: 10.1111/ajt.13792. Epub 2016 Apr 19.	Dalle Ave AL	Am J Transplant	2016-03-22		26999771		10.1111/ajt.13792
2016	Dalle Ave AL, Shaw DM, Gardiner D.	Extracorporeal membrane oxygenation (ECMO) assisted cardiopulmonary resuscitation or uncontrolled donation after the circulatory determination of death following out-of-hospital refractory cardiac arrest-An ethical analysis of an unresolved clinical dilemma	27449821	Switzerland, UK	EISOR	Review	1	1	1		1			Due to the similarity of indications of ECPR and uDCDD from ECMO, there is an inborn risk of including a patient in the uDCDD protocol who would otherwise have survived on ECPR. Therefore, international guidelines for the termination of resuscitation, the avoidance of decisions during transport, the exclusion of non-excellent centres for uDCDD programs, the priority of ECPR and the avoidance of d…	Dalle Ave AL, Shaw DM, Gardiner D.	Resuscitation. 2016 Nov;108:87-94. doi: 10.1016/j.resuscitation.2016.07.003. Epub 2016 Jul 20.	Dalle Ave AL	Resuscitation	2016-07-25		27449821		10.1016/j.resuscitation.2016.07.003
2016	Fan E, Gattinoni L, Combes A, Schmidt M, Peek G, Brodie D, Muller T, Morelli A, Ranieri VM, Pesenti A, Brochard L, Hodgson C, Van Kiersbilck C, Roch A, Quintel M, Papazian L.	Venovenous extracorporeal membrane oxygenation for acute respiratory failure : A clinical review from an international group of experts	27007108	Canada, Italy, France, USA (NY), Germany, Australia	Resource allocation	Review	1	1						There are only a few studies on the long-term outcomes of ECMO. In the case of ARDS, most studies show results comparable to conventional therapy with a poorer physical state of the patients compared to a sex- and gender-matched cohort. Futile ECMO should be avoided by consequently defining the therapeutical goals (if recovery and transplantation are excluded, ECMO is contraindicated as futile). …	Fan E, Gattinoni L, Combes A, Schmidt M, Peek G, Brodie D, Muller T, Morelli A, Ranieri VM, Pesenti A, Brochard L, Hodgson C, Van Kiersbilck C, Roch A, Quintel M, Papazian L.	Intensive Care Med. 2016 May;42(5):712-724. doi: 10.1007/s00134-016-4314-7. Epub 2016 Mar 23.	Fan E	Intensive Care Med	2016-03-24		27007108		10.1007/s00134-016-4314-7
2016	Fleischman AR.	Ethical issues in neonatal research involving human subjects	26804381	USA (NY)	Trials and evidence	Essay	1	1	1					Clinical research on neonates has resulted in extraordinary advances and decreased mortality in neonatal care. Consequently, therefore, well-designed and -scrutinised studies are essential to improve children’s treatment. Scrutiny should be shown in the protection of participants by investigators, sponsors, IRBs, research institutions, regulators, and government policy-makers. Consent should be s…	Fleischman AR.	Semin Perinatol. 2016 Jun;40(4):247-53. doi: 10.1053/j.semperi.2015.12.014. Epub 2016 Jan 21.	Fleischman AR	Semin Perinatol	2016-01-26		26804381		10.1053/j.semperi.2015.12.014
2016	Fuehner T, Kuehn C, Welte T, Gottlieb J.	ICU Care Before and After Lung Transplantation	26953218	Germany	Resource allocation	Review	1	1	1					All alternatives and contraindications to lung transplantation and its prospects should be assessed before commencing ECLS. No clinical standards exist for ECLS withdrawal, which is necessarily individual and influenced by regional and ethical heterogeneity.	Fuehner T, Kuehn C, Welte T, Gottlieb J.	Chest. 2016 Aug;150(2):442-50. doi: 10.1016/j.chest.2016.02.656. Epub 2016 Mar 4.	Fuehner T	Chest	2016-03-09		26953218		10.1016/j.chest.2016.02.656
2016	Kukora S, Laventhal N.	Choosing wisely: should past medical decisions impact the allocation of scarce ECMO resources?	27146166	USA (MI)	Resource allocation	Commentary	1	1	1					Scarce ECMO-resources in a H1N1-epidemic should be allocated to vaccinated adults who need it. Adults who refuse the vaccination should be given a lower priority, in accordance with consequentialistic, fairness and virtue ethics.	Kukora S, Laventhal N.	Acta Paediatr. 2016 Aug;105(8):876-8. doi: 10.1111/apa.13457. Epub 2016 Jun 2.	Kukora S	Acta Paediatr	2016-05-06		27146166		10.1111/apa.13457
2016	Meltzer EC, Ivascu NS, Stark M, Orfanos AV, Acres CA, Christos PJ, Mangione T, Fins JJ.	A Survey of Physicians' Attitudes toward Decision-Making Authority for Initiating and Withdrawing VA-ECMO: Results and Ethical Implications for Shared Decision Making	28001135	USA (NY), USA (VT), USA (MA)	Resource allocation	Empirical study	1	1	1					In contrast to general principles in medical ethics, the majority of a group of surveyed physicians advocate for exercising discretion in limiting care decisions concerning V-A ECMO. The reason for this could be an attempt to manage the knowledge gap between professionals and patients or their families, to avoid the distress of end-of-life conflicts and to use scarce resources in a responsible wa…	Meltzer EC, Ivascu NS, Stark M, Orfanos AV, Acres CA, Christos PJ, Mangione T, Fins JJ.	J Clin Ethics. 2016 Winter;27(4):281-289. doi: 10.2217/bmm.10.117.	Meltzer EC	J Clin Ethics	2016-12-22	PMC5735424	28001135	NIHMS925293	10.2217/bmm.10.117
2016	Moon SM, Lee H, Moon JH, Kim HK, Park JE, Byeon S, Suh GY, Chung CR.	Prolonged Maintenance of VV ECMO for 104 Days with Native Lung Recovery in Acute Respiratory Failure	26461237	South Korea	Resource allocation	Case report	1	1	1					A case of late recovery from a lung injury on ECMO is presented. Knowledge of irreversibility is poor, hence it is challenging to limit ECMO, especially when lung transplantation is refused.	Moon SM, Lee H, Moon JH, Kim HK, Park JE, Byeon S, Suh GY, Chung CR.	ASAIO J. 2016 Mar-Apr;62(2):e15-7. doi: 10.1097/MAT.0000000000000293.	Moon SM	ASAIO J	2015-10-14		26461237		10.1097/MAT.0000000000000293
2016	Sen A, Callisen HE, Alwardt CM, Larson JS, Lowell AA, Libricz SL, Tarwade P, Patel BM, Ramakrishna H.	Adult venovenous extracorporeal membrane oxygenation for severe respiratory failure: Current status and future perspectives	26750681	USA (AZ)	Resource allocation	Review	1	1					1	Ethics, resources and the patient’s care goals should be balanced in a fair and compassionate way.	Sen A, Callisen HE, Alwardt CM, Larson JS, Lowell AA, Libricz SL, Tarwade P, Patel BM, Ramakrishna H.	Ann Card Anaesth. 2016 Jan-Mar;19(1):97-111. doi: 10.4103/0971-9784.173027.	Sen A	Ann Card Anaesth	2016-01-12	PMC4900379	26750681		10.4103/0971-9784.173027
2017	Bein T, Brodie D.	Understanding ethical decisions for patients on extracorporeal life support	28349177	Germany, USA (NY)	Resource allocation	Commentary	1	1	1					ECMO provokes a new thinking about medical ethics. Patients and relatives may be overwhelmed by end-of-life decisions on ECMO. They should be closely guided through open and empathic dialogue and advance care planning, and be supported by mandatory ethics consultation and spiritual and palliative care providers if necessary. The goals of therapy (bridge to recovery, guarantee of a status quo or p…	Bein T, Brodie D.	Intensive Care Med. 2017 Oct;43(10):1510-1511. doi: 10.1007/s00134-017-4781-5. Epub 2017 Mar 27.	Bein T	Intensive Care Med	2017-03-29	PMC5610199	28349177		10.1007/s00134-017-4781-5
2017	Bhatnagar SN, Sarin YK.	Management of Congenital Diaphragmatic Hernia in Newborn - Paradigm Shift and Ethical Issues	28620733	India	Resource allocation	Review	1	1	1					Scarcity of ECMO resources is also an issue in neonatology in India, due to a lack of evidence regarding when to withhold treatment in neonates with significant morbidity. Efforts should be directed toward research and the development of best practice.	Bhatnagar SN, Sarin YK.	Indian J Pediatr. 2017 Aug;84(8):629-635. doi: 10.1007/s12098-017-2374-5. Epub 2017 Jun 16.	Bhatnagar SN	Indian J Pediatr	2017-06-17		28620733		10.1007/s12098-017-2374-5
2017	Brodie D, Curtis JR, Vincent JL, Bakker J, Brown CE, Creteur J, Papazian L, Sladen RN, Ranieri VM; participants in the Round Table Conference.	Treatment limitations in the era of ECMO	28705688	USA (NY), USA (WA), Belgium, Netherlands, France, Italy	Resource allocation	Expert opinion	1	1	1					The ethical challenges of ECMO also include the potential impact on the current code status of patients. Instead of checklists, physicians’ efforts should be directed toward the deliberation process, together with their patients and their surrogates, in a multidisciplinary manner.	Brodie D, Curtis JR, Vincent JL, Bakker J, Brown CE, Creteur J, Papazian L, Sladen RN, Ranieri VM; participants in the Round Table Conference.	Lancet Respir Med. 2017 Oct;5(10):769-770. doi: 10.1016/S2213-2600(17)30263-1. Epub 2017 Jul 10.	Brodie D	Lancet Respir Med	2017-07-15		28705688		10.1016/S2213-2600(17)30263-1
2017	Carlsen AW, Winnerkvist AM, Greiff G.	A 95 year-old suffering circulatory arrest after accidental hypothermia: a case report	29070019	Norway	Resource allocation	Case report	1	1		1	1			Decision-making in the elderly population might be challenging in the emergent situation. Decisions should be made in a time-sensitive manner.	Carlsen AW, Winnerkvist AM, Greiff G.	BMC Geriatr. 2017 Oct 26;17(1):249. doi: 10.1186/s12877-017-0646-6.	Carlsen AW	BMC Geriatr	2017-10-27	PMC5657076	29070019		10.1186/s12877-017-0646-6
2017	Dalle Ave AL, Bernat JL.	Donation after brain circulation determination of death	28228145	Switzerland, USA (NH)	EISOR	Essay	1	1	1		1			Death should be defined as the permanent cessation of brain function, and assessed either prospectively, by the permanent cessation of brain circulation in circulatory death, or retrospectively, by the irreversible cessation of brain function in cases of brain damage. For the retrieval of donor organs in circulatory death, the term “donation after brain circulation determination of death” (DBCDD)…	Dalle Ave AL, Bernat JL.	BMC Med Ethics. 2017 Feb 23;18(1):15. doi: 10.1186/s12910-017-0173-1.	Dalle Ave AL	BMC Med Ethics	2017-02-24	PMC5322624	28228145		10.1186/s12910-017-0173-1
2017	Kon AA, Davidson JE.	Retiring the Term Futility in Value-Laden Decisions Regarding Potentially Inappropriate Medical Treatment	28148610	USA (CA)	Resource allocation	Editorial	1	1						In accordance with the relevant US critical care organisations, a shared decision-making approach between clinicians and surrogates regarding the withdrawal of ECMO should be employed. The term “futility” should only be used to refer to physiologically ineffective interventions. All interventions that involve value-based disagreements between clinicians, or between clinicians and surrogates in a …	Kon AA, Davidson JE.	Crit Care Nurse. 2017 Feb;37(1):9-11. doi: 10.4037/ccn2017234.	Kon AA	Crit Care Nurse	2017-02-03		28148610		10.4037/ccn2017234
2017	Makdisi T, Makdisi G.	Extra corporeal membrane oxygenation support: ethical dilemmas	28361077	USA (MA), USA (FL)	Resource allocation	Essay	1	1	1					The ECMO-team should define the goals of a given ECMO-treatment on a daily basis. Novel ethical questions emerge related to ECMO-indication, duration and withdrawal, the patient’s dignity, fair resource allocation, the role of surrogates in decision-making, the appropriateness of ECMO in DBDD, and the obligation to transfer patients to regional ECMO centres when indicated. In view of the difficul…	Makdisi T, Makdisi G.	Ann Transl Med. 2017 Mar;5(5):112. doi: 10.21037/atm.2017.01.38.	Makdisi T	Ann Transl Med	2017-04-01	PMC5360601	28361077		10.21037/atm.2017.01.38
2017	Makdisi T, Makdisi G.	Ethical challenges in extra corporeal membrane oxygenation use	28595436	USA (MA), USA (FL)	Resource allocation	Editorial	1	1						Emergent situations might force professionals to oversimplify complex conditions and surrogates to consent. Earning the surrogates’ trust is crucial. When ECMO is futile or does not contribute to the quality of life according to the patient’s wishes, a discussion of limiting treatment should be considered. Patients should not be forced, but supported. If in such a situation the surrogates are una…	Makdisi T, Makdisi G.	Ann Palliat Med. 2017 Dec;6(Suppl 2):S128-S131. doi: 10.21037/apm.2017.03.11. Epub 2017 May 5.	Makdisi T	Ann Palliat Med	2017-06-10		28595436		10.21037/apm.2017.03.11
2017	Ting PS, Chen L, Yang WC, Huang TS, Wu CC, Chen YY.	Gender and age disparity in the initiation of life-supporting treatments: a population-based cohort study	29141641	Taiwan	Resource allocation	Empirical study	1	1	1					In Taiwan, both men and elder people are overrepresented. The reason for this may be cultural. Physicians should therefore be sensitive to these aspects when making decisions regarding the indication for ECMO or its withdrawal.	Ting PS, Chen L, Yang WC, Huang TS, Wu CC, Chen YY.	BMC Med Ethics. 2017 Nov 15;18(1):62. doi: 10.1186/s12910-017-0222-9.	Ting PS	BMC Med Ethics	2017-11-17	PMC5688717	29141641		10.1186/s12910-017-0222-9
2017	Trummer G, Supady A, Beyersdorf F, Scherer C, Wengenmayer T, Umhau M, Benk C.	Controlled automated reperfusion of the whole body after 120 minutes of Cardiopulmonary resuscitation: first clinical report	28693585	Germany	Resource allocation	Case report	1	1						The question as to how long resuscitation efforts have to be continued and whether eCPR should be offered after a long period of CPR is yet again challenged by this case report of long-term survival without neurological sequelae after application of a novel ECLS technique.	Trummer G, Supady A, Beyersdorf F, Scherer C, Wengenmayer T, Umhau M, Benk C.	Scand J Trauma Resusc Emerg Med. 2017 Jul 10;25(1):66. doi: 10.1186/s13049-017-0412-y.	Trummer G	Scand J Trauma Resusc Emerg Med	2017-07-12	PMC5504811	28693585		10.1186/s13049-017-0412-y
2017	Whitman GJ.	Extracorporeal membrane oxygenation for the treatment of postcardiotomy shock	27666787	USA (MD)	Resource allocation	Essay	1	1	1					The cost of ECMO is a burden to caregivers, as it entails the novel responsibility to honour not only life, but also death. Commonly, families are unable to negotiate the difficulty of making any decision. Physicians should therefore be prepared to provide guidance to patients and their families, through consensual counselling, ethics committee consultation and expert deliberation, as is the case…	Whitman GJ.	J Thorac Cardiovasc Surg. 2017 Jan;153(1):95-101. doi: 10.1016/j.jtcvs.2016.08.024. Epub 2016 Aug 31.	Whitman GJ	J Thorac Cardiovasc Surg	2016-09-27		27666787		10.1016/j.jtcvs.2016.08.024
2017	Yukawa T, Kashiura M, Sugiyama K, Tanabe T, Hamabe Y.	Neurological outcomes and duration from cardiac arrest to the initiation of extracorporeal membrane oxygenation in patients with out-of-hospital cardiac arrest: a retrospective study	28915913	Japan	Trials and evidence	Empirical study	1	1			0			The study shows a significant but limited (time-related) benefit of ECPR regarding survival and neurologic outcome. A the human and economic costs of ECPR were unknown, strict selection and prospective studies were needed to determine the standard indication of ECPR in cardiac arrest.	Yukawa T, Kashiura M, Sugiyama K, Tanabe T, Hamabe Y.	Scand J Trauma Resusc Emerg Med. 2017 Sep 16;25(1):95. doi: 10.1186/s13049-017-0440-7.	Yukawa T	Scand J Trauma Resusc Emerg Med	2017-09-17	PMC5603067	28915913		10.1186/s13049-017-0440-7
2018	Dalle Ave AL, Bernat JL.	Uncontrolled Donation After Circulatory Determination of Death: A Systematic Ethical Analysis	28296536	Switzerland, USA (NH)	EISOR	Review	1	1	1		1			There is still an irreducible uncertainty regarding how long resuscitation should continue in a given case. Physicians should therefore ascertain that the patient is not recoverable by additional resuscitation techniques before considering the patient’s entry into an uncontrolled donation after circulatory death (uDCDD) protocol. The no-touch period should at least be 10 minutes. The professional…	Dalle Ave AL, Bernat JL.	J Intensive Care Med. 2018 Nov;33(11):624-634. doi: 10.1177/0885066616682200. Epub 2016 Dec 21.	Dalle Ave AL	J Intensive Care Med	2017-03-16		28296536		10.1177/0885066616682200
2018	Gattinoni L, Vasques F, Quintel M.	Use of ECMO in ARDS: does the EOLIA trial really help?	29976250	Germany	Trials and evidence	Editorial	1	1						After the EOLIA trial, another RCT of ECMO versus non-ECMO in severe hypoxia seemed unethical and unpractical.	Gattinoni L, Vasques F, Quintel M.	Crit Care. 2018 Jul 5;22(1):171. doi: 10.1186/s13054-018-2098-6.	Gattinoni L	Crit Care	2018-07-07	PMC6034241	29976250		10.1186/s13054-018-2098-6
2018	Han JJ, Swain JD.	The Perfect ECMO Candidate	29519358	USA (PA)	Resource allocation	Case report	1	1						The author, a trainee in cardiac surgery, presents a disputable case of initiating ECMO in a setting of unclear acute multiorgan failure. ECMO means a substantial drainage of intensive care resources, and therefore should be allocated to selected patients only. Besides the existing guidelines, the author had to cope with strong emotions associated with the decision-making process. Training in the…	Han JJ, Swain JD.	J Am Coll Cardiol. 2018 Mar 13;71(10):1178-1182. doi: 10.1016/j.jacc.2018.02.001.	Han JJ	J Am Coll Cardiol	2018-03-10		29519358		10.1016/j.jacc.2018.02.001
2018	Kirsch R, Munson D.	Ethical and end of life considerations for neonates requiring ECMO support	29331209	Canada, USA (PA)	Resource allocation	Essay	1	1	1					Early, clear and compassionate communication could help to inform guidance on the initiation, course and discontinuation of ECMO. Rationing should occur proximally to the individual case. The ethical principles of autonomy, nonmaleficence and justice should be respected. ECMO does not differ from other life-sustaining-therapy in an ethical sense. Neonates may be granted a unique ethical status.	Kirsch R, Munson D.	Semin Perinatol. 2018 Mar;42(2):129-137. doi: 10.1053/j.semperi.2017.12.009. Epub 2018 Jan 10.	Kirsch R	Semin Perinatol	2018-01-15		29331209		10.1053/j.semperi.2017.12.009
2018	MacLaren G.	When to initiate ECMO with low likelihood of success	30231907	Singapore, Australia	Resource allocation	Editorial	1	1						In some exceptional cases, ECMO might be indicated, although the expected short-term survival might be low. If the long-term outcome is estimated as conceivable, the (or an alternative) institution has sufficient resources, the patient and surrogates assent, and the ECMO leadership is supportive, it should be considered. Physicians should not deny ECMO simply because it might be seen as unfair to…	MacLaren G.	Crit Care. 2018 Sep 19;22(1):217. doi: 10.1186/s13054-018-2162-2.	MacLaren G	Crit Care	2018-09-21	PMC6145325	30231907		10.1186/s13054-018-2162-2
2018	Oude Lansink-Hartgring A, Dos Reis Miranda D, Donker DW, Maas JJ, Delnoij T, Kuijpers M, van den Brule J, Scholten E, Endeman H, Vlaar APJ, van den Bergh WM; Dutch ECLS study group.	Cost-effectiveness in extracorporeal life support in critically ill adults in the Netherlands	29523153	Netherlands	Resource allocation	Study protocol	1	1		1				A study protocol on the cost-effectiveness of ECLS in adults is presented. A cost-effective impact of ECLS compared to conventional care, and expressed by the patients’ self-assessment, is expected.	Oude Lansink-Hartgring A, Dos Reis Miranda D, Donker DW, Maas JJ, Delnoij T, Kuijpers M, van den Brule J, Scholten E, Endeman H, Vlaar APJ, van den Bergh WM; Dutch ECLS study group.	BMC Health Serv Res. 2018 Mar 9;18(1):172. doi: 10.1186/s12913-018-2964-6.	Oude Lansink-Hartgring A	BMC Health Serv Res	2018-03-11	PMC5845153	29523153		10.1186/s12913-018-2964-6
2018	Periche Pedra E, Koborzan MR, Sbraga F, Blasco Lucas A, Toral Sepúlveda D.	Outcomes of extracorporeal membrane oxygenation in adult patients with hypoxemic respiratory failure refractory to mechanical ventilation	30237974	Spain	Resource allocation	Empirical study	0	1		0				Data on the beneficial effect of ECMO in ARDS are limited, but support its use in a controlled manner. Reversibility of the respiratory failure and the absence of any other therapeutic limitation were prerequisites to ECMO, and inherent to therapeutic decisions when the prognosis remains uncertain. There is evidence of the positive effect of centralising ECMO therapy, and multidisciplinary and or…	Periche Pedra E, Koborzan MR, Sbraga F, Blasco Lucas A, Toral Sepúlveda D.	Respir Med Case Rep. 2018 Sep 13;25:220-224. doi: 10.1016/j.rmcr.2018.09.007. eCollection 2018.	Periche Pedra E	Respir Med Case Rep	2018-09-22	PMC6143695	30237974		10.1016/j.rmcr.2018.09.007
2018	Peterec SM, Bizzarro MJ, Mercurio MR.	Is Extracorporeal Membrane Oxygenation for a Neonate Ever Ethically Obligatory?	29248183	USA (CT)	Resource allocation	Case report	1	1	1	1	1			ECMO for meconium aspiration syndrome appears to have a qualitative and quantitative outcome comparable to other life-saving-treatments in neonatology or congenital cardiac surgery. Therefore, ECMO, when feasible, should be an obligatory treatment strategy in such cases, following the principle of the child’s best interest. Consistency in our ethical reasoning, and in how we approach candidate tr…	Peterec SM, Bizzarro MJ, Mercurio MR.	J Pediatr. 2018 Apr;195:297-301. doi: 10.1016/j.jpeds.2017.11.018. Epub 2017 Dec 13.	Peterec SM	J Pediatr	2017-12-18		29248183		10.1016/j.jpeds.2017.11.018
2018	Ross LF.	Respecting Choice in Definitions of Death	30584847	USA (IL)	EISOR	Essay	1	1		0				Its inherently metaphysical nature means that death can probably never be defined uniformly for people, professionals or laymen. A range of possibilities should be approved, ranging from complete brain death to an irreversible loss of consciousness. Halevy and Brody show that irreversible loss of entire brain function is not guaranteed by DBD so far. Clinicians measure different things. More evid…	Ross LF.	Hastings Cent Rep. 2018 Nov;48 Suppl 4:S53-S55. doi: 10.1002/hast.956.	Ross LF	Hastings Cent Rep	2018-12-26		30584847		10.1002/hast.956
2018	Salna M, Takeda K, Kurlansky P, Ikegami H, Fan L, Han J, Stein S, Topkara V, Yuzefpolskaya M, Colombo PC, Karmpaliotis D, Naka Y, Kirtane AJ, Garan AR, Takayama H.	The influence of advanced age on venous-arterial extracorporeal membrane oxygenation outcomes	29365092	USA (NY)	Resource allocation	Retrospective observational study	1	0						Advanced age is an independent risk factor for high mortality, yet factors such as frailty and comorbidity must be assessed, and age alone should not exclude from V-A ECMO. The authors suggest further studies are needed and that patient selection should be based on individual assessment by the healthcare team.	Salna M, Takeda K, Kurlansky P, Ikegami H, Fan L, Han J, Stein S, Topkara V, Yuzefpolskaya M, Colombo PC, Karmpaliotis D, Naka Y, Kirtane AJ, Garan AR, Takayama H.	Eur J Cardiothorac Surg. 2018 Jun 1;53(6):1151-1157. doi: 10.1093/ejcts/ezx510.	Salna M	Eur J Cardiothorac Surg	2018-01-25		29365092		10.1093/ejcts/ezx510
2018	Singer B, Reynolds JC, Lockey DJ, O'Brien B.	Pre-hospital extra-corporeal cardiopulmonary resuscitation	29587810	UK	Resource allocation	Review	0	1						Multiple observational studies in ECPR have identified several prognostic issues, e.g. time of no- or low-flow before and under CPR, which should be applied in ECPR programmes. Logistical obstacles and opportunity costs under the inherent risk of over-triage should be held against the benefits of a rapid response in pre-hospital ECPR.	Singer B, Reynolds JC, Lockey DJ, O'Brien B.	Scand J Trauma Resusc Emerg Med. 2018 Mar 27;26(1):21. doi: 10.1186/s13049-018-0489-y.	Singer B	Scand J Trauma Resusc Emerg Med	2018-03-29	PMC5870373	29587810		10.1186/s13049-018-0489-y
2018	Stephens AL, Bruce CR.	Setting Expectations for ECMO: Improving Communication Between Clinical Teams and Decision Makers	29977468	USA (TX)	Resource allocation	Report	1	1						The ethics team described in the article would provide a communication function regarding ECMO among professionals and between professionals and surrogates. When ECMO discontinuation is the most viable option, it is appropriate to switch from a collaborative to a more guiding approach in order to free surrogates from the burden of decision-making.	Stephens AL, Bruce CR.	Methodist Debakey Cardiovasc J. 2018 Apr-Jun;14(2):120-125. doi: 10.14797/mdcj-14-2-120.	Stephens AL	Methodist Debakey Cardiovasc J	2018-07-07	PMC6027715	29977468		10.14797/mdcj-14-2-120
2019	Abrams D, Curtis JR, Prager KM, Garan AR, Hastie J, Brodie D.	Ethical Considerations for Mechanical Support	31677684	USA (NY), USA (WA)	Resource allocation	Review	1	1	0	1	1			ECLS provokes some unique ethical challenges (price, the need for intensive care), which should be anticipated by the professional care team. Early dialogue with patients and surrogates should be targeted. This is important to allow for continued judgement, instead of considering ECLS as the default. Economically, ECLS may change its costs over time, and should be assessed in the context of the h…	Abrams D, Curtis JR, Prager KM, Garan AR, Hastie J, Brodie D.	Anesthesiol Clin. 2019 Dec;37(4):661-673. doi: 10.1016/j.anclin.2019.08.001. Epub 2019 Oct 11.	Abrams D	Anesthesiol Clin	2019-11-04		31677684		10.1016/j.anclin.2019.08.001
2019	Abrams D, Pham T, Burns KEA, Combes A, Curtis JR, Mueller T, Prager KM, Serra A, Slutsky AS, Brodie D, Schmidt M; International ECMO Network (ECMONet).	Practice Patterns and Ethical Considerations in the Management of Venovenous Extracorporeal Membrane Oxygenation Patients: An International Survey	31356471	USA (NY), Canada, France, USA (WA), Germany	Resource allocation	Empirical study	1	1			1			A scenario-based survey study of physicians’ attitudes concerning the limitation of V-V ECMO in ARDS is presented. Patient-level factors were known to be correlated with poor prognosis, and the patients’ or their surrogates’ wishes were associated with the respondents’ decisions regarding the continuation or withdrawal of ECMO. However, the respondents reported low rates of shared decision-making…	Abrams D, Pham T, Burns KEA, Combes A, Curtis JR, Mueller T, Prager KM, Serra A, Slutsky AS, Brodie D, Schmidt M; International ECMO Network (ECMONet).	Crit Care Med. 2019 Oct;47(10):1346-1355. doi: 10.1097/CCM.0000000000003910.	Abrams D	Crit Care Med	2019-07-30		31356471		10.1097/CCM.0000000000003910
2019	Ares GJ, Buonpane C, Helenowski I, Reynolds M, Hunter CJ.	Outcomes and associated ethical considerations of long-run pediatric ECMO at a single center institution	30683989	USA (IL)	Resource allocation	Empirical study	1	1	1					Long-run ECMO in children is correlated with higher mortality and morbidity. Larger register studies are required to support these outcomes and to guide clinicians in the open and timely deliberation of relevant cases.	Ares GJ, Buonpane C, Helenowski I, Reynolds M, Hunter CJ.	Pediatr Surg Int. 2019 Mar;35(3):321-328. doi: 10.1007/s00383-019-04443-y. Epub 2019 Jan 25.	Ares GJ	Pediatr Surg Int	2019-01-27	PMC6433597	30683989	NIHMS1018607	10.1007/s00383-019-04443-y
2019	Blythe JA, Wieten SE, Batten JN.	Response to "Will We Code for Default ECMO?": Clarifying the Scope of Do-Not-ECMO Orders	31651394	USA (CA)	Resource allocation	Commentary	1	1	1		1			Clinicians might misinterpret the scope of a DNE (do-not-ECLS), as they do with the DNR (do-not-resuscitate). ECLS could be a component of CPR, but also be used in other contexts. Therefore, clinicians and ethicists should work on narrowing the scope of an eventual default status of ECLS.	Blythe JA, Wieten SE, Batten JN.	AMA J Ethics. 2019 Oct 1;21(10):E926-929. doi: 10.1001/amajethics.2019.926.	Blythe JA	AMA J Ethics	2019-10-26		31651394		10.1001/amajethics.2019.926
2019	Brauner DJ, Zimmermann CJ.	Will We Code for Default ECMO?	31127925	USA (IL), USA (WI)	Resource allocation	Commentary	1	1	1		1			The history of cardiopulmonary resuscitation illustrates how therapeutic innovations influence the default indication for treatment, primarily through the public’s expectations, the technical imperative and billing possibilities. However, cardiac arrest should never become a blanket indication for either CPR or ECLS.	Brauner DJ, Zimmermann CJ.	AMA J Ethics. 2019 May 1;21(5):E443-449. doi: 10.1001/amajethics.2019.443.	Brauner DJ	AMA J Ethics	2019-05-26		31127925		10.1001/amajethics.2019.443
2019	Brierley J, Marks SD.	Is deceased organ donation using extracorporeal membrane oxygenation transport ethical and feasible?	31535422	UK	EISOR	Editorial	1	1			0			A case report on organ donation from a brain-dead child on ECMO is commented on. The commentary identifies a lack of internationally standardised, evidence-based assessment of death in paediatric organ donors. Efforts should be made to change practice.	Brierley J, Marks SD.	Pediatr Transplant. 2019 Nov;23(7):e13570. doi: 10.1111/petr.13570. Epub 2019 Sep 18.	Brierley J	Pediatr Transplant	2019-09-20		31535422		10.1111/petr.13570
2019	DeMartino ES, Braus NA, Sulmasy DP, Bohman JK, Stulak JM, Guru PK, Fuechtmann KR, Singh N, Schears GJ, Mueller PS.	Decisions to Withdraw Extracorporeal Membrane Oxygenation Support: Patient Characteristics and Ethical Considerations	30853261	USA (MN), USA (DC), USA (FL), USA (NY)	Resource allocation	Review	1	1			1			In the study cohort of patients with withdrawn ECMO (1 in 4 patients on ECMO), almost one-third had DNR orders. Withholding should not be used because withdrawal seems illegal or unethical. This denies patients an ECMO trial while their prognosis is clarified. Stopping an unwanted or unbeneficial therapy has been affirmed ethically and legally. ECMO-withdrawal differs substantially from euthanasi…	DeMartino ES, Braus NA, Sulmasy DP, Bohman JK, Stulak JM, Guru PK, Fuechtmann KR, Singh N, Schears GJ, Mueller PS.	Mayo Clin Proc. 2019 Apr;94(4):620-627. doi: 10.1016/j.mayocp.2018.09.020. Epub 2019 Mar 8.	DeMartino ES	Mayo Clin Proc	2019-03-12		30853261		10.1016/j.mayocp.2018.09.020
2019	Di Nardo M, Dalle Ore A, Testa G, Annich G, Piervincenzi E, Zampini G, Bottari G, Cecchetti C, Amodeo A, Lorusso R, Del Sorbo L, Kirsch R.	Principlism and Personalism. Comparing Two Ethical Models Applied Clinically in Neonates Undergoing Extracorporeal Membrane Oxygenation Support	31417882	Italy, Canada, Netherlands	Resource allocation	Essay	1	1	1					The principlist bioethics system seeks to balance four non-hierarchical principles when making treatment decisions: autonomy, beneficence, non-maleficence, and justice. In contrast, the personalist approach highlights the sanctity of the physical and spiritual human life as a whole, and is supplied based on the principle of proportionate therapy and the principle of sociality and subsidiarity. Bo…	Di Nardo M, Dalle Ore A, Testa G, Annich G, Piervincenzi E, Zampini G, Bottari G, Cecchetti C, Amodeo A, Lorusso R, Del Sorbo L, Kirsch R.	Front Pediatr. 2019 Jul 30;7:312. doi: 10.3389/fped.2019.00312. eCollection 2019.	Di Nardo M	Front Pediatr	2019-08-17	PMC6682695	31417882		10.3389/fped.2019.00312
2019	Grunau B, MacRedmond R, Gill J.	A Promising Therapy in Jeopardy	30664375	Canada	Resource allocation	Commentary	1	1		1	1			Despite the high up-front costs of ECPR, it could be justified based on the high number of selected patients suffering cardiac arrest who could benefit. Prolonged ECPR can be a source of ethical tension in patients without neurologic recovery, as described in a case where a young patient’s family were opposed to the withdrawal of futile ECPR. The Supreme Court of Canada decided that withdrawal is…	Grunau B, MacRedmond R, Gill J.	Circulation. 2019 Jan 22;139(4):425-427. doi: 10.1161/CIRCULATIONAHA.118.035674.	Grunau B	Circulation	2019-01-22		30664375		10.1161/CIRCULATIONAHA.118.035674
2019	Gutteridge D, Bosslet GT.	What Should We Learn From Early Hemodialysis Allocation About How We Should Be Using ECMO?	31127922	USA (IN)	Resource allocation	Commentary	1	1	1					Deliberative democracy could help organisations and users to make the right decisions about ECMO, just as it developed the management of haemodialysis and organ transplantation. It could be organised around the topics contraindications of ECMO and the role of QUALYs, and explore in more depth the debate about technology and therapeutic futility at the end of life.	Gutteridge D, Bosslet GT.	AMA J Ethics. 2019 May 1;21(5):E421-428. doi: 10.1001/amajethics.2019.421.	Gutteridge D	AMA J Ethics	2019-05-26		31127922		10.1001/amajethics.2019.421
2019	Henry B, Verbeek PR, Cheskes S.	Extracorporeal cardiopulmonary resuscitation in out-of-hospital cardiac arrest: Ethical considerations	30731112	Canada	Trials and evidence, Resource allocation	Commentary	1	1		1				Some ECPR issues are still unclear: 1) Should the “load and go” approach be prioritised in regard to the possibility of PCI and ECPR? 2) Should shared decision-making have another role in ECPR with regard to the non-curing nature of bridging on ECPR? 3) How can data registration be standardised and completed, and cover both prehospital care and post-discharge quality of life as a supplement to th…	Henry B, Verbeek PR, Cheskes S.	Resuscitation. 2019 Apr;137:1-6. doi: 10.1016/j.resuscitation.2019.01.036. Epub 2019 Feb 4.	Henry B	Resuscitation	2019-02-08		30731112		10.1016/j.resuscitation.2019.01.036
2019	Jaramillo C, Braus N.	How Should ECMO Initiation and Withdrawal Decisions Be Shared?	31127917	USA (MA), USA (WI)	Resource allocation	Commentary	1	1		1				As patient consent alone (without clinical indication) does not justify a medical intervention, beneficence or nonmaleficence do not justify the discontinuation of ECMO without taking into account patient autonomy. Nor does the bridge-to-nowhere scenario constitute sufficient ethical grounds for this decision. Unilateral decisions threaten mutual understanding and shared decision-making. The dest…	Jaramillo C, Braus N.	AMA J Ethics. 2019 May 1;21(5):E387-393. doi: 10.1001/amajethics.2019.387.	Jaramillo C	AMA J Ethics	2019-05-26		31127917		10.1001/amajethics.2019.387
2019	Kimmoun A, Levy B.	Predicting clinical outcome in patients undergoing VA-ECMO	30764857	France	Resource allocation	Editorial	1	1						It is important to be aware of the background of the development of predictive scores, as many were developed for patients already on ECMO, and therefore their interpretation and use may be erroneous.	Kimmoun A, Levy B.	Crit Care. 2019 Feb 14;23(1):47. doi: 10.1186/s13054-019-2350-8.	Kimmoun A	Crit Care	2019-02-16	PMC6376643	30764857		10.1186/s13054-019-2350-8
2019	Kumar Puri N, Conrad SA.	Painting a Fuller Picture	31524697	USA (NJ), USA (LA)	Resource allocation	Commentary	1	1						The empirical study by Abrams et al. of physicians’ attitudes toward the limitation of ECLS is commented on. The low frequency of prone positioning prior to ECLS is mentioned, as is the lack of discussion regarding withdrawal of ECLS upon cannulation and the consequent involvement of patients, surrogates and nurses in the decision-making. Limiting care could be seen as a strategy for avoiding the…	Kumar Puri N, Conrad SA.	Crit Care Med. 2019 Oct;47(10):1459-1460. doi: 10.1097/CCM.0000000000003946.	Kumar Puri N	Crit Care Med	2019-09-17		31524697		10.1097/CCM.0000000000003946
2019	Meltzer EC, Ivascu NS, Edwin MK, Ingall TJ.	Should Long-Term Life-Sustaining Care Be Started in Emergency Settings?	31127919	USA (AZ), USA (NY)	Resource allocation	Commentary	1	1	1					Just as with other life-sustaining therapies, the proportionality of V-A ECMO should be assessed. However, the fact that ECMO depends on alternatives (restitution, VAD, TX) makes it an exceptional treatment. It should be offered even if no surrogates are known, based on the assumption that it would be rational for the patient to consent. This consent should be reassessed and verified in an ongoin…	Meltzer EC, Ivascu NS, Edwin MK, Ingall TJ.	AMA J Ethics. 2019 May 1;21(5):E401-406. doi: 10.1001/amajethics.2019.401.	Meltzer EC	AMA J Ethics	2019-05-26		31127919		10.1001/amajethics.2019.401
2019	Molina M, Domínguez-Gil B, Pérez-Villares JM, Andrés A.	Uncontrolled donation after circulatory death: ethics of implementation	31090649	Spain	EISOR	Review	1	1	1					Running a uDCD-programme is also feasible in combination with an ECPR programme and based on international guidelines. Ignoring uDCD as a possibility may therefore be seen as inadequate praxis. Ethical concerns can be diminished by ensuring separation of the treatment teams, sufficient monitoring during transport and in-hospital determination of death, which should be based on the permanent cessa…	Molina M, Domínguez-Gil B, Pérez-Villares JM, Andrés A.	Curr Opin Organ Transplant. 2019 Jun;24(3):358-363. doi: 10.1097/MOT.0000000000000648.	Molina M	Curr Opin Organ Transplant	2019-05-16		31090649		10.1097/MOT.0000000000000648
2019	Mulaikal TA, Nakagawa S, Prager KM.	Extracorporeal Membrane Oxygenation Bridge to No Recovery	30664369	USA (NY)	Resource allocation	Commentary	1	1	1					V-A ECMO leads to unique ethical challenges in relation to the withdrawal of futile treatment. Patients on ECMO with severe neurological dysfunction and without the prospect of discharge from the ICU should be legally withdrawn from active treatment as long as there is consensus among the treating physicians. Futility compromises professional integrity. Like other forms of therapy, ECMO should be…	Mulaikal TA, Nakagawa S, Prager KM.	Circulation. 2019 Jan 22;139(4):428-430. doi: 10.1161/CIRCULATIONAHA.118.036304.	Mulaikal TA	Circulation	2019-01-22		30664369		10.1161/CIRCULATIONAHA.118.036304
2019	Nurok M, Warsh J, Griner T, Kharabi M, Castongia J, Overbeck C, Krueger L, Coleman B, Ramzy D, Chung J, Chan A, Ley E, Kubendran S, Parrish N, Yu Z, Langberg M, Finder S, Rosen BT, Kaplan RS, Sax H, Arabia F.	Extracorporeal Membrane Oxygenation Appropriateness: An Interdisciplinary Consensus-Based Approach	29261542	USA (CA), USA (MA)	Resource allocation	Empirical study	1	1		1				Regular interdisciplinary rounds during ECMO may improve decision-making and communication with families. The consensus-based approach may reduce the duration of ECMO and the costs thereof in eventually futile cases, where disagreements between carers extend the duration of therapy. “Where possible, emphasis was placed on whether ongoing ECMO support was consistent with a patient’s minimally acce…	Nurok M, Warsh J, Griner T, Kharabi M, Castongia J, Overbeck C, Krueger L, Coleman B, Ramzy D, Chung J, Chan A, Ley E, Kubendran S, Parrish N, Yu Z, Langberg M, Finder S, Rosen BT, Kaplan RS, Sax H, Arabia F.	Anesth Analg. 2019 Mar;128(3):e38-e41. doi: 10.1213/ANE.0000000000002723.	Nurok M	Anesth Analg	2017-12-21		29261542		10.1213/ANE.0000000000002723
2019	Shapey IM, Summers A, Augustine T, van Dellen D.	Systematic review to assess the possibility of return of cerebral and cardiac activity after normothermic regional perfusion for donors after circulatory death	30667536	UK	EISOR	Review	1	1						A systematic review comparing retrospective studies on ECPR outcomes in OHCA and NRP-DCD (normothermic regional perfusion in DCD/EISOR) is presented. Where ECPR increases the amount of survivors with both good and poor neurological results, NRP-DCD improves the viability of kidney and liver grafts. Ethical considerations associated with NPR-DCD include premortem interventions and the duration to …	Shapey IM, Summers A, Augustine T, van Dellen D.	Br J Surg. 2019 Feb;106(3):174-180. doi: 10.1002/bjs.11046. Epub 2019 Jan 22.	Shapey IM	Br J Surg	2019-01-23	PMC6749564	30667536		10.1002/bjs.11046
2019	Sonntag EA, Shah KB, Katz JN.	Educating Resident and Fellow Physicians on the Ethics of Mechanical Circulatory Support	31127920	USA (NC), USA (IL), USA (VA)	Resource allocation	Commentary	1	1	1		1			The ethics of MCS should be taught in residency for cardiologists and cardiac surgeons, including the concepts of the patient’s best interest, beneficence and nonmaleficence, respect for autonomy, shared decision-making and informed consent, surrogate-decision making and end-of-life care, including withdrawing and withholding and palliative care.	Sonntag EA, Shah KB, Katz JN.	AMA J Ethics. 2019 May 1;21(5):E407-415. doi: 10.1001/amajethics.2019.407.	Sonntag EA	AMA J Ethics	2019-05-26		31127920		10.1001/amajethics.2019.407
2019	Tchana-Sato V, Ledoux D, Detry O, Hans G, Ancion A, D'Orio V, Massion PB, Amabili P, Bruls S, Lavigne JP, Monard J, Delbouille MH, Sakalihasan N, Defraigne JO.	Successful clinical transplantation of hearts donated after circulatory death using normothermic regional perfusion	31128600	Belgium	EISOR	Case report	1	1	1					The ante-mortem interventions described in the article and the restoration of circulation after declaration of death might be sensitive ethical issues and restrict EISOR in some countries. A good outcome and a safe no-touch-period, as well as the clamping of the aortic arch vessels, should be held against any reservations.	Tchana-Sato V, Ledoux D, Detry O, Hans G, Ancion A, D'Orio V, Massion PB, Amabili P, Bruls S, Lavigne JP, Monard J, Delbouille MH, Sakalihasan N, Defraigne JO.	J Heart Lung Transplant. 2019 Jun;38(6):593-598. doi: 10.1016/j.healun.2019.02.015.	Tchana-Sato V	J Heart Lung Transplant	2019-05-27		31128600		10.1016/j.healun.2019.02.015
2019	Volpi S, Sertic F, Valchanov K, De Silva R.	Use veno-venous extra corporeal membrane oxygenation in elderly patients with post-cardiotomy hypoxia: the changing paradigm of respiratory support in adult respiratory distress syndrome	30642349	UK	Resource allocation	Case report	1	1						There is no specific age-limit to V-V ECMO. Despite high mortality rates, carefully selected elderly patients may benefit from the intervention.	Volpi S, Sertic F, Valchanov K, De Silva R.	J Cardiothorac Surg. 2019 Jan 14;14(1):10. doi: 10.1186/s13019-019-0833-y.	Volpi S	J Cardiothorac Surg	2019-01-16	PMC6332628	30642349		10.1186/s13019-019-0833-y
2020	Antiel RM, Curlin FA, Persad G, White DB, Zhang C, Glickman A, Emanuel EJ, Lantos JD.	Should Pediatric Patients Be Prioritized When Rationing Life-Saving Treatments During COVID-19 Pandemic	32647066	USA (MO), USA (NC), USA (CO), USA (PA)	Resource allocation	Essay	1	1		1	1			The COVID-19 pandemic might impose the rationing of ECMO. Younger patients should be prioritised due to the egalitarian concept of complete lives saved, mediated by prognosis and beneficence in general (prioritising health care workers) in a multi-step approach, aimed at avoiding discrimination based on age. Allocation on a first-come-first-served principle, or by lottery, social worth, sex, race…	Antiel RM, Curlin FA, Persad G, White DB, Zhang C, Glickman A, Emanuel EJ, Lantos JD.	Pediatrics. 2020 Sep;146(3):e2020012542. doi: 10.1542/peds.2020-012542. Epub 2020 Jul 9.	Antiel RM	Pediatrics	2020-07-11		32647066		10.1542/peds.2020-012542
2020	Carlisle EM, Loeff DS.	Emerging issues in the ethical utilization of pediatric extracorporeal membrane oxygenation	32332329	USA (IA), USA (IL)	Resource allocation	Review	1	1		1	1			Advances in ECMO and curative therapy have increased the number of potential paediatric candidates. For some patients, ECMO is associated with excellent outcomes, and in such cases it may be argued that its application is in the patient’s best interest and should be obligatory. Ethics consultation and deliberation should be preventive. Professional consensus should be acquired prior to communicat…	Carlisle EM, Loeff DS.	Curr Opin Pediatr. 2020 Jun;32(3):411-415. doi: 10.1097/MOP.0000000000000901.	Carlisle EM	Curr Opin Pediatr	2020-04-26		32332329		10.1097/MOP.0000000000000901
2020	Cheruku S, Dave S, Goff K, Park C, Ebeling C, Cohen L, Styrvoky K, Choi C, Anand V, Kershaw C.	Cardiopulmonary Resuscitation in Intensive Care Unit Patients With Coronavirus Disease 2019	32620487	USA (TX)	Resource allocation	Review	1	1		0	1			All patients hospitalised with COVID-19 should, if possible, be asked about their attitude towards care goals and resuscitation. Due to the risk of contamination and the low expectation of sufficient recovery, several countries have restricted their recommendations about CPR. In the US, the treatment of patients with COVID-19 differs between hospitals. A nuanced utilitarian approach that takes in…	Cheruku S, Dave S, Goff K, Park C, Ebeling C, Cohen L, Styrvoky K, Choi C, Anand V, Kershaw C.	J Cardiothorac Vasc Anesth. 2020 Oct;34(10):2595-2603. doi: 10.1053/j.jvca.2020.06.008. Epub 2020 Jun 10.	Cheruku S	J Cardiothorac Vasc Anesth	2020-07-05	PMC7286272	32620487		10.1053/j.jvca.2020.06.008
2020	Combes A, Price S, Slutsky AS, Brodie D.	Temporary circulatory support for cardiogenic shock	32682486	France. UK, Canada	Resource allocation,Trials and evidence	Review	1	1		1	1		1	Temporary circulatory support could be used in cardiogenic shock, despite the lack of randomised data. Research is urgently needed to ascertain the effect of ECMO and its costs. The circumstances under which ECMO is applied are constrained by time pressure and lack of information. Questions therefore remain about when it is appropriate to withhold or withdraw ECMO. Here, the blurred lines between…	Combes A, Price S, Slutsky AS, Brodie D.	Lancet. 2020 Jul 18;396(10245):199-212. doi: 10.1016/S0140-6736(20)31047-3.	Combes A	Lancet	2020-07-20		32682486		10.1016/S0140-6736(20)31047-3
2020	Di Nardo M, Dalle Ore A, Starr J, Cecchetti C, Amodeo A, Testa G.	Ethics and extracorporeal membrane oxygenation during coronavirus disease 2019 outbreak	32580648	Italy, USA (CA)	Resource allocation	Letter to the editor	1	1	0	1	1			In line with the WHO recommendations, ECMO should be offered to selected COVID-19 patients with acute respiratory failure. The proactive development of ECMO deployment and rationing guidelines are suggested in order to avoid a potential overload of the healthcare system. When ethical conflicts arise, a multivariable approach should be assessed, including principles from both principlistic and per…	Di Nardo M, Dalle Ore A, Starr J, Cecchetti C, Amodeo A, Testa G.	Perfusion. 2020 Sep;35(6):562-564. doi: 10.1177/0267659120937545. Epub 2020 Jun 25.	Di Nardo M	Perfusion	2020-06-26		32580648		10.1177/0267659120937545
2020	Drake D, Morrow CD, Kinlaw K, De Bonis M, Zangrillo A, Sade RM; Cardiothoracic Ethics Forum.	Cardiothoracic surgeons in pandemics: Ethical considerations	32689702	USA (MI), USA (GA), USA (SC), Italy	Resource allocation	Guideline	1	1		1	1			In pandemics, proactive resource allocation can help increase individual and cumulative life-years. However, utilitarianism is not considered an adequate ethical approach, as it does not address the principles of autonomy, maleficence and justice. Discrimination should be avoided. Scarce resources should be allocated to the patients who benefit most. Allocation based on social worth, wealth or th…	Drake D, Morrow CD, Kinlaw K, De Bonis M, Zangrillo A, Sade RM; Cardiothoracic Ethics Forum.	J Thorac Cardiovasc Surg. 2020 Aug;160(2):456-459. doi: 10.1016/j.jtcvs.2020.03.117. Epub 2020 Apr 9.	Drake D	J Thorac Cardiovasc Surg	2020-07-22	PMC7146669	32689702		10.1016/j.jtcvs.2020.03.117
2020	Ehmann MR, Zink EK, Levin AB, Suarez JI, Belcher HM, Daugherty Biddison EL, Doberman DJ, D'Souza K, Fine DM, Garibaldi BT, Gehrie EA, Golden SH, Gurses AP, Hill PM, Hughes MT, Kahn J, Koch CG, Marx JJ, Meisenberg BR, Natterman J, Rushton CH, Sapirstein A, Selinger SR, Stephens RS, Toner ES, Unguru Y, van Stone M, Kachalia A.	Operational recommendations for scarce resource allocation in a public health crisis	32991873	USA (MD)	Resource allocation	Report	1	1			1			A US resource-allocation programme regarding scarcity during COVID-19 is presented, based on a public survey of citizens’ values. Each resource requires an individual approach. Data allowing the prognostic comparison of COVID-19 patients on and those eligible for ECMO is missing. Patients should not be (de-)selected according to arbitrary criteria. Patients on ECMO should be reassessed, and thera…	Ehmann MR, Zink EK, Levin AB, Suarez JI, Belcher HM, Daugherty Biddison EL, Doberman DJ, D'Souza K, Fine DM, Garibaldi BT, Gehrie EA, Golden SH, Gurses AP, Hill PM, Hughes MT, Kahn J, Koch CG, Marx JJ, Meisenberg BR, Natterman J, Rushton CH, Sapirstein A, Selinger SR, Stephens RS, Toner ES, Unguru Y, van Stone M, Kachalia A.	Chest. 2020 Sep 26:S0012-3692(20)34804-2. doi: 10.1016/j.chest.2020.09.246. Online ahead of print.	Ehmann MR	Chest	2020-09-29	PMC7521357			10.1016/j.chest.2020.09.246
2020	Gardiner D, Charlesworth M, Rubino A, Madden S.	The rise of organ donation after circulatory death: a narrative review	32430909	UK	EISOR	Review	1	1			1		1	Regarding the UK DCD programme, the Organ Donation Taskforce and a broad engagement of different organisations was intended to address ethical issues in advance. The ambition was to make DCD a normal part of end-of-life care. The Academy of Royal Medical Colleges claimed five mins. of asystole as a prerequisite for DCDD. Thoraco-abdominal normothermic regional perfusion (NRP/EISOR) remains an eth…	Gardiner D, Charlesworth M, Rubino A, Madden S.	Anaesthesia. 2020 Sep;75(9):1215-1222. doi: 10.1111/anae.15100. Epub 2020 May 19.	Gardiner D	Anaesthesia	2020-05-21		32430909		10.1111/anae.15100
2020	Hoyler MM, Kumar S, Thalappillil R, White RS, Tam CW.	VV-ECMO usage in ARDS due to COVID-19: Clinical, practical and ethical considerations	32447163	USA (NY)	Resource allocation	Letter to the editor	1	1		1	1			During the COVID-19 pandemic, ECMO might be viewed as unjustifiable if resources are scarce. COVID-19 patients and all others should be treated on the basis of the same ethical principles, as suggested by Emmanuel and colleagues: maximising benefit (individually and collectively), which meant the worst-off patients being prioritised, allocation by instrumental value and lottery. Proactive plannin…	Hoyler MM, Kumar S, Thalappillil R, White RS, Tam CW.	J Clin Anesth. 2020 Oct;65:109893. doi: 10.1016/j.jclinane.2020.109893. Epub 2020 May 20.	Hoyler MM	J Clin Anesth	2020-05-25	PMC7237897	32447163		10.1016/j.jclinane.2020.109893
2020	Lim JKB, Qadri SK, Toh TSW, Lin CB, Mok YH, Lee JH.	Extracorporeal Membrane Oxygenation for Severe Respiratory Failure During Respiratory Epidemics and Pandemics: A Narrative Review	32296808	Singapore	Resource allocation	Review	1	1		1	1			In times when healthcare resources are scarce, the development of pre-disaster plans and preparation at national and international level, centralising care and continuing education is paramount. There are two broad approaches that guide patient selection for ECMO in a pandemic: 1) the use of ethical principles (broad social value, instrumental value, maximising life years and the life cycle princ…	Lim JKB, Qadri SK, Toh TSW, Lin CB, Mok YH, Lee JH.	Ann Acad Med Singap. 2020 Apr;49(4):199-214.	Lim JKB	Ann Acad Med Singap	2020-04-17		32296808
2020	Lorusso R, Whitman G, Milojevic M, Raffa G, McMullan DM, Boeken U, Haft J, Bermudez C, Shah A, D'Alessandro DA.	2020 EACTS/ELSO/STS/AATS expert consensus on post-cardiotomy extracorporeal life support in adult patients	33039139	Netherlands, USA (MD), Serbia, Italy, USA (WA), Germany, USA (MI), USA (PA), USA (TN), USA (MA)	Resource allocation	Guideline	1	1						Randomised data on the outcome of post-cardiotomy ECLS (PC-ECLS) were missing. Long-term survival and QOL were unpredictable under PC-ECLS. Overwhelming responsibility might stress surrogates. Guided decision-making is recommended. ECLS professionals commonly favour decision-making authority for ECLS patients. Withdrawal should be undertaken when it has been determined that acceptable QOL is not …	Lorusso R, Whitman G, Milojevic M, Raffa G, McMullan DM, Boeken U, Haft J, Bermudez C, Shah A, D'Alessandro DA.	J Thorac Cardiovasc Surg. 2020 Oct 7:S0022-5223(20)32642-8. doi: 10.1016/j.jtcvs.2020.09.045. Online ahead of print.	Lorusso R	J Thorac Cardiovasc Surg	2020-10-11				10.1016/j.jtcvs.2020.09.045
2020	MacGregor RM, Antiel RM, Najaf T, Said AS, Warner BW, Raval MV, Shakhsheer B.	Extracorporeal Membrane Oxygenation for Pediatric Patients With Coronavirus Disease 2019-Related Illness	32427689	USA (MO), USA (IL)	Resource allocation	Empirical study	1	1		1	0			Although US organisations had proposed guidelines for the use of ECMO in COVID-19, there remains a lack of consensus regarding children. A survey in the US showed that most centres had enacted regional guidelines prior to the pandemic, and performed ECMO using the same indication criteria as in other viral illnesses. Only a minority have restricted ECMO in cases of terminal illness, CNS damage, D…	MacGregor RM, Antiel RM, Najaf T, Said AS, Warner BW, Raval MV, Shakhsheer B.	Pediatr Crit Care Med. 2020 May 15. doi: 10.1097/PCC.0000000000002432. Online ahead of print.	MacGregor RM	Pediatr Crit Care Med	2020-05-20		32427689		10.1097/PCC.0000000000002432
2020	Manara A, Shemie SD, Large S, Healey A, Baker A, Badiwala M, Berman M, Butler AJ, Chaudhury P, Dark J, Forsythe J, Freed DH, Gardiner D, Harvey D, Hornby L, MacLean J, Messer S, Oniscu GC, Simpson C, Teitelbaum J, Torrance S, Wilson LC, Watson CJE.	Maintaining the permanence principle for death during in situ normothermic regional perfusion for donation after circulatory death organ recovery: A United Kingdom and Canadian proposal	31922653	UK, Canada	EISOR	Essay	1	1			1			In Canada, the UK, Belgium and the Netherlands, DCD accounts for a substantial proportion of organ-donation procedures. Regarding the use of NPR/EISOR, there were concerns about the collateral perfusion of the brain, and thus the reversal of the declaration of death as framed by the concept of permanence. Novel surgical techniques are presented that can minimise (and in the case of abdominal clam…	Manara A, Shemie SD, Large S, Healey A, Baker A, Badiwala M, Berman M, Butler AJ, Chaudhury P, Dark J, Forsythe J, Freed DH, Gardiner D, Harvey D, Hornby L, MacLean J, Messer S, Oniscu GC, Simpson C, Teitelbaum J, Torrance S, Wilson LC, Watson CJE.	Am J Transplant. 2020 Aug;20(8):2017-2025. doi: 10.1111/ajt.15775. Epub 2020 Jan 27.	Manara A	Am J Transplant	2020-01-11		31922653		10.1111/ajt.15775
2020	Parent B, Moazami N, Wall S, Carillo J, Kon Z, Smith D, Walsh BC, Caplan A.	Ethical and logistical concerns for establishing NRP-cDCD heart transplantation in the United States	31913567	USA (NY)	EISOR	Essay	1	1		1	1			Ethics requires that any conflict of interest in the withdrawal of life-sustaining treatment (LST) is prevented. According to a review, liver, kidney and pancreas grafts from DCD with normothermic regional perfusion (NRP/EISOR) are of acceptable quality, compared to grafts from brain-dead donors. There remain some concerns about ensuring that NPR does not affect medical care or hasten death. Cons…	Parent B, Moazami N, Wall S, Carillo J, Kon Z, Smith D, Walsh BC, Caplan A.	Am J Transplant. 2020 Jun;20(6):1508-1512. doi: 10.1111/ajt.15772. Epub 2020 Jan 21.	Parent B	Am J Transplant	2020-01-09		31913567		10.1111/ajt.15772
2020	Prekker ME, Brunsvold ME, Bohman JK, Fischer G, Gram KL, Litell JM, Saavedra-Romero R, Hick JL.	Regional Planning for Extracorporeal Membrane Oxygenation Allocation During Coronavirus Disease 2019	32339510	USA (MN)	Resource allocation	Report	1	1		1	1			A US state’s plan for prioritising ECMO is presented, in anticipation of an ECMO shortage during the COVID-19 pandemic. While the WHO suggests the use of ECMO in refractory hypoxemia, existing guidelines have neglected the thoughtful allocation of ECMO. Outcome data were not widely available. It is necessary to limit ECMO to patients according to their benefit on a regional level, but a general f…	Prekker ME, Brunsvold ME, Bohman JK, Fischer G, Gram KL, Litell JM, Saavedra-Romero R, Hick JL.	Chest. 2020 Aug;158(2):603-607. doi: 10.1016/j.chest.2020.04.026. Epub 2020 Apr 25.	Prekker ME	Chest	2020-04-28	PMC7182515	32339510		10.1016/j.chest.2020.04.026
2020	Quintel M, Bartlett RH, Grocott MPW, Combes A, Ranieri MV, Baiocchi M, Nava S, Brodie D, Camporota L, Vasques F, Busana M, Marini JJ, Gattinoni L.	Extracorporeal Membrane Oxygenation for Respiratory Failure	32149776	Germany, USA (MI), UK, France, Italy, USA (NY), USA (MN)	Resource allocation	Review	1	1		1	1			The key ethical question is who should and should not be on ECMO – a question that is difficult to answer due to a lack of evidence. In the scenario of a bridge to nowhere, there is no clear path to handle the patient’s or the surrogate’s will that differs from the professionals’ decision. Costs are difficult to assess, especially in international comparison, but must not be neglected. Beneficenc…	Quintel M, Bartlett RH, Grocott MPW, Combes A, Ranieri MV, Baiocchi M, Nava S, Brodie D, Camporota L, Vasques F, Busana M, Marini JJ, Gattinoni L.	Anesthesiology. 2020 May;132(5):1257-1276. doi: 10.1097/ALN.0000000000003221.	Quintel M	Anesthesiology	2020-03-10		32149776		10.1097/ALN.0000000000003221
2020	Shekar K, Badulak J, Peek G, Boeken U, Dalton HJ, Arora L, Zakhary B, Ramanathan K, Starr J, Akkanti B, Antonini MV, Ogino MT, Raman L, Barret N, Brodie D, Combes A, Lorusso R, MacLaren G, Müller T, Paden M, Pellegrino V; ELSO Guideline Working Group.	Extracorporeal Life Support Organization Coronavirus Disease 2019 Interim Guidelines: A Consensus Document from an International Group of Interdisciplinary Extracorporeal Membrane Oxygenation Providers	32604322	Australia, USA (WA), USA (FL), Germany, USA (IA), USA (OR), Singapore, USA (CA), USA (TX), Italy, USA (DE), USA (PA), UK, USA (NY), Netherlands, USA (GA)	Resource allocation	Guideline	1	1		1	1			ELSO guidelines for ECMO in the COVID-19 pandemic are presented. The guidelines consist of four tiers that ration approaches, including withholding ECMO due to risk of staff contamination, patient prognosis and age. At the outset, indications of ECMO in COVID-19 should follow the general recommendations for ECMO. Centralisation and regular communication between centres and agents are recommended.…	Shekar K, Badulak J, Peek G, Boeken U, Dalton HJ, Arora L, Zakhary B, Ramanathan K, Starr J, Akkanti B, Antonini MV, Ogino MT, Raman L, Barret N, Brodie D, Combes A, Lorusso R, MacLaren G, Müller T, Paden M, Pellegrino V; ELSO Guideline Working Group.	ASAIO J. 2020 Jul;66(7):707-721. doi: 10.1097/MAT.0000000000001193.	Shekar K	ASAIO J	2020-07-01		32604322		10.1097/MAT.0000000000001193
2020	Skansebo E, Broomé M, Magnusson J, Riise GC, Dellgren G.	Extended use of extra corporeal membrane oxygenation as bridge to lung transplantation in two patients	31931854	Sweden	Resource allocation	Case Report	1	1		1	1			Prolonged courses on ECMO in relation to lung transplantation were possible in certain presented cases. This complicates ethical decisions on the omission of therapies.	Skansebo E, Broomé M, Magnusson J, Riise GC, Dellgren G.	J Cardiothorac Surg. 2020 Jan 13;15(1):16. doi: 10.1186/s13019-020-1046-0.	Skansebo E	J Cardiothorac Surg	2020-01-15	PMC6958736	31931854		10.1186/s13019-020-1046-0
2020	Supady A, Bode C, Duerschmied D.	Procedural justice and egalitarian principles for rationing decisions in the COVID-19 crisis	32993767	Germany	Resource allocation	Letter	1	1			1			A commentary on an editorial by Abrams et al. on ECMO under COVID-19 is presented. The utilitarian approach is criticised and supplanted by Norman Daniels’ egalitarian approach, which includes conditions of publicity, relevance, revision, appeals and regulation. The essential advantage of Daniels’ concept is that the public participate in prioritising ECMO through transparent deliberation. In the…	Supady A, Bode C, Duerschmied D.	Crit Care. 2020 Sep 29;24(1):590. doi: 10.1186/s13054-020-03283-w.	Supady A	Crit Care	2020-09-30	PMC7524376			10.1186/s13054-020-03283-w
2020	Wheaton T, Menkiti O, Misra A.	Streptococcus pyogenes purpura fulminans and septic shock: A case highlighting the ethical considerations of high-risk extracorporeal membrane oxygenation	31984828	USA (PA)	Resource allocation	Case report	1	1	0	1	1			A paediatric case of a 3-year-old child with purpura fulminans due to streptococcus pyogenes sepsis and shock is presented. After successful decannulation but intended withdrawal of other life-sustaining therapy, the patient died from refractory infection. A high-risk patient who was a candidate for ECMO should prompt a conversation involving surrogates regarding principlist bioethics.	Wheaton T, Menkiti O, Misra A.	Int J Artif Organs. 2020 Jul;43(7):500-502. doi: 10.1177/0391398820901832. Epub 2020 Jan 25.	Wheaton T	Int J Artif Organs	2020-01-28		31984828		10.1177/0391398820901832
2020	Worku E, Gill D, Brodie D, Lorusso R, Combes A, Shekar K.	Provision of ECPR during COVID-19: evidence, equity, and ethical dilemmas	32718340	Australia, USA (NY), Netherlands, France	Resource allocation	Essay	1	1			1			The appropriate use of ECPR faces new challenges during COVID-19. The critical care community has to confront the ethical boundaries between individual rights and distributive justice. Due to the current crisis, ELSO recommends the limiting of ECPR. According to retrospective studies, cardiac arrest has had a unfavourable prognosis during COVID-19. Continuing ECPR under COVID-19 requires surge-se…	Worku E, Gill D, Brodie D, Lorusso R, Combes A, Shekar K.	Crit Care. 2020 Jul 27;24(1):462. doi: 10.1186/s13054-020-03172-2.	Worku E	Crit Care	2020-07-29	PMC7384274	32718340		10.1186/s13054-020-03172-2

## Sheet: Tabel med ALLE artikler
felter med gult er kommenteret - tjek kommentaren! :-)								Titel screening(0/1 for relevans)		Abstract gennemgang (0/1)					Ethical content
Publication Year	Authors	Title	PMID	Country	Underemne	Type	Reason for deselection	Alix	Jesper	Marcs tidligere og midlertidig	Alix	Jesper	Alix'husk	Søren		Authors		Citation	First Author	Journal/Book	Create Date	PMCID	PMID	NIHMS ID	DOI
1987	Stolar CJ, Dillon PW.	Extracorporeal membrane oxygenation for neonatal respiratory failure	3547704				No access	0	0	0				2		Stolar CJ, Dillon PW.		Surg Annu. 1987;19:111-22.	Stolar CJ	Surg Annu	1987-01-01		3547704
2015	Ryan J.	Extracorporeal membrane oxygenation for pediatric cardiac arrest	25639578	US (PA)		Essay	No access	0	0	0				2		Ryan J.		Crit Care Nurse. 2015 Feb;35(1):60-9. doi: 10.4037/ccn2015655.	Ryan J	Crit Care Nurse	2015-02-03		25639578		10.4037/ccn2015655
2019	Perez-Protto SE, Rowbottom JR, Taylor MA.	"Wishes Unknown: " A Case Report	31180907				No access	0	0	0	1	0				Perez-Protto SE, Rowbottom JR, Taylor MA.		A A Pract. 2019 Sep 1;13(5):188-189. doi: 10.1213/XAA.0000000000001030.	Perez-Protto SE	A A Pract	2019-06-11		31180907		10.1213/XAA.0000000000001030
2016	Khodeli N, Chkhaidze Z, Partsakhashvili D, Pilishvili O, Kordzaia D.	[THEORETICAL BACKGROUND OF FINDING ORGANS FOR TRANSPLANTATION AMONG NON-HEART BEATING DONORS UNDER UNSUCCESSFUL EXTRACORPOREAL RESUSCITATION (LITERATURE REVIEW)]	27348175	Georgia			No access	0	0	0						Khodeli N, Chkhaidze Z, Partsakhashvili D, Pilishvili O, Kordzaia D.		Georgian Med News. 2016 May;(254):92-7.	Khodeli N	Georgian Med News	2016-06-28		27348175
2017	Diaz O.	Rise of the Machines: In an Era of Ventricular Assist Devices, Prolonging Life or Death?	32751024	USA			No access	0	0	0		1				Diaz O.		J Dr Nurs Pract. 2017;10(2):96-107. doi: 10.1891/2380-9418.10.2.96.	Diaz O	J Dr Nurs Pract	2020-08-06		32751024		10.1891/2380-9418.10.2.96
1997	Puri P, Wester T.	Historical aspects of congenital diaphragmatic hernia	9069205				No access	0	0							Puri P, Wester T.		Pediatr Surg Int. 1997 Mar 21;12(2/3):95-100.	Puri P	Pediatr Surg Int	1997-03-21		9069205
1997	Puri P, Wester T.	Historical aspects of congenital diaphragmatic hernia	9156880				No access	0	0							Puri P, Wester T.		Pediatr Surg Int. 1997 Feb;12(2-3):95-100.	Puri P	Pediatr Surg Int	1997-02-01		9156880
2002	Aylott M.	Interviewing as therapy: researching parents' experiences of their child's life-threatening illness requiring ECMO	12238707				No access	0	0							Aylott M.		Nurs Crit Care. 2002 Jul-Aug;7(4):163-70.	Aylott M	Nurs Crit Care	2002-09-20		12238707
1989	Graham TR, Chalmers JA.	Temporary mechanical ventricular support: Part 2	2665894				No access			0						Graham TR, Chalmers JA.		Br J Hosp Med. 1989 Jun;41(6):520-4.	Graham TR	Br J Hosp Med	1989-06-01		2665894
1990	Marwick C.	NIH 'Research Risks Office' reprimands hospital institutional review board	2329621				No access			0						Marwick C.		JAMA. 1990 May 9;263(18):2420.	Marwick C	JAMA	1990-05-09		2329621
1990	Rushton CH.	Balancing the benefits and burdens of ECMO. The nurse's role	2264973				No access			0						Rushton CH.		Crit Care Nurs Clin North Am. 1990 Sep;2(3):481-91.	Rushton CH	Crit Care Nurs Clin North Am	1990-09-01		2264973
1991	Fraser TL, Ebbers BJ.	Ethical considerations of the extracorporeal membrane oxygenation procedure	1760784				No access			0						Fraser TL, Ebbers BJ.		Can Oper Room Nurs J. 1991 Nov-Dec;9(4):9-12.	Fraser TL	Can Oper Room Nurs J	1991-11-01		1760784
1992	Botkin JR.	Ethics and evidence	11643057				No access			0						Botkin JR.		J Clin Ethics. 1992 Spring;3(1):63-4.	Botkin JR	J Clin Ethics	1992-04-01		11643057
1992	Estrada EA.	ECMO for neonatal and pediatric patients: state-of-the-art and future trends	1542528				No access	0	0	0		1		2		Estrada EA.		Pediatr Nurs. 1992 Jan-Feb;18(1):67-74.	Estrada EA	Pediatr Nurs	1992-01-01		1542528
1992	Krauss AN, Miké V, Ross GS.	Perinatal technology: answers and questions	1301829				No access			0						Krauss AN, Miké V, Ross GS.		J Clin Ethics. 1992 Spring;3(1):56-62; discussion 63-7.	Krauss AN	J Clin Ethics	1992-01-01		1301829
1992	Truog RD, Arnold JH.	The "ethics of evidence" and randomized controlled trials	11643058				No access			0				2		Truog RD, Arnold JH.		J Clin Ethics. 1992 Spring;3(1):65-7.	Truog RD	J Clin Ethics	1992-04-01		11643058
1992	Truog RD.	Randomized controlled trials: lessons from ECMO	1395439				No access			0				2		Truog RD.		Clin Res. 1992 Oct;40(3):519-27.	Truog RD	Clin Res	1992-10-01		1395439
1993	Morris AH.	Cost-benefit considerations in managing oxygenation failure	10145860				No access	0	0	0	1	1				Morris AH.		Respir Care. 1993 Jul;38(7):829-38; discussion 838-41.	Morris AH	Respir Care	1993-07-01		10145860
1995	Milerad J, Walsh WF.	Commentary on neonatal ECMO: a North American and Scandinavian perspective	7488802				No access	0	0	0	1	1				Milerad J, Walsh WF.		Acta Paediatr. 1995 Aug;84(8):841-7. doi: 10.1111/j.1651-2227.1995.tb13775.x.	Milerad J	Acta Paediatr	1995-08-01		7488802		10.1111/j.1651-2227.1995.tb13775.x
1997		Fumes from the spleen	9246688				No access			0								Paediatr Perinat Epidemiol. 1997 Jul;11(3):260-8. doi: 10.1111/j.1365-3016.1997.tb00002.x.		Paediatr Perinat Epidemiol	1997-07-01		9246688		10.1111/j.1365-3016.1997.tb00002.x
2002	Harris S.	Nurses' views on withdrawing ECMO: a grounded theory study	12226950				No access			0						Harris S.		Nurs Crit Care. 2002 May-Jun;7(3):144-51.	Harris S	Nurs Crit Care	2002-09-14		12226950
2002	Orr RD.	Clinical ethics case consultation	14700038				No access			0						Orr RD.		Ethics Med. 2002 Summer;18(2):33-4.	Orr RD	Ethics Med	2004-01-01		14700038
2013	Botha J, Tiruvoipati R, Goldberg D.	Futility of medical treatment in current medical practice	24157992				No access			0						Botha J, Tiruvoipati R, Goldberg D.		N Z Med J. 2013 Sep 27;126(1383):58-71.	Botha J	N Z Med J	2013-10-26		24157992
2013	Callaghan M, Doyle Y, O'Hare B, Healy M, Nölke L.	Economics and ethics of paediatric respiratory extra corporeal life support	24282901				No access			0				2		Callaghan M, Doyle Y, O'Hare B, Healy M, Nölke L.		Ir Med J. 2013 Sep;106(8):252-3.	Callaghan M	Ir Med J	2013-11-29		24282901
2014	Meltzer EC, Ivascu NS, Fins JJ.	DNR and ECMO: a paradox worth exploring	24779313				No access			0				2		Meltzer EC, Ivascu NS, Fins JJ.		J Clin Ethics. 2014 Spring;25(1):13-9.	Meltzer EC	J Clin Ethics	2014-05-01		24779313
2016	Howe EG.	New Paradigms in Medical Ethics	28001134				No access			0						Howe EG.		J Clin Ethics. 2016 Winter;27(4):267-280.	Howe EG	J Clin Ethics	2016-12-22		28001134
2016	Williams SB, Dahnke MD.	Clarification and Mitigation of Ethical Problems Surrounding Withdrawal of Extracorporeal Membrane Oxygenation	27694358				No access			0				2		Williams SB, Dahnke MD.		Crit Care Nurse. 2016 Oct;36(5):56-65. doi: 10.4037/ccn2016504.	Williams SB	Crit Care Nurse	2016-10-04		27694358		10.4037/ccn2016504
2009	Jousset N, Jacob JP, Gaudin A, Mauillon D, Penneau M, Rougé-Maillart C.	[Recovery of transportable organs after cardiac arrest]	19171457				Other language	0	0	0						Jousset N, Jacob JP, Gaudin A, Mauillon D, Penneau M, Rougé-Maillart C.		Presse Med. 2009 May;38(5):740-4. doi: 10.1016/j.lpm.2008.10.015. Epub 2009 Jan 25.	Jousset N	Presse Med	2009-01-28		19171457		10.1016/j.lpm.2008.10.015
2012	Chavatte-Palmer P, Lévy R, Boileau P.	[Reproduction without a uterus? State of the art of ectogenesis]	23084738				Other language	0	0	0						Chavatte-Palmer P, Lévy R, Boileau P.		Gynecol Obstet Fertil. 2012 Nov;40(11):695-7. doi: 10.1016/j.gyobfe.2012.09.008. Epub 2012 Oct 16.	Chavatte-Palmer P	Gynecol Obstet Fertil	2012-10-23		23084738		10.1016/j.gyobfe.2012.09.008
2013	Leprince P.	[Cardiac graft allocation]	25163343				Other language	0	0	0						Leprince P.		Bull Acad Natl Med. 2013 Mar;197(3):599-605.	Leprince P	Bull Acad Natl Med	2014-08-29		25163343
2015	Schaible T.	[Extracorporeal membrane oxygenation in children]	26267893				Other language	0	0	0						Schaible T.		Med Klin Intensivmed Notfmed. 2015 Sep;110(6):438-44. doi: 10.1007/s00063-015-0062-7. Epub 2015 Aug 13.	Schaible T	Med Klin Intensivmed Notfmed	2015-08-13		26267893		10.1007/s00063-015-0062-7
2018	Hascoet S, Boet A, Nubret K, Lilot M, Feuillet S, Benbrik N, Guihaire J, Le Bret E, Fadel E, Fouilloux V, Amedro P, Houyel L, Kreitmann B.	[Extracorporeal life support and heart-lung transplant in children]	29580908				Other language	0	0	0						Hascoet S, Boet A, Nubret K, Lilot M, Feuillet S, Benbrik N, Guihaire J, Le Bret E, Fadel E, Fouilloux V, Amedro P, Houyel L, Kreitmann B.		Presse Med. 2018 Jul-Aug;47(7-8 Pt 1):611-619. doi: 10.1016/j.lpm.2018.01.014. Epub 2018 Mar 24.	Hascoet S	Presse Med	2018-03-28		29580908		10.1016/j.lpm.2018.01.014
2019	Karagiannidis C, Bein T, Weber-Carstens S.	[Indications and limitations of ECMO therapy : Considerations on evidence, treatment decisions and ethical challenges]	30721332	Germany			Other language	0	0	0						Karagiannidis C, Bein T, Weber-Carstens S.		Med Klin Intensivmed Notfmed. 2019 Apr;114(3):207-213. doi: 10.1007/s00063-019-0533-3. Epub 2019 Feb 5.	Karagiannidis C	Med Klin Intensivmed Notfmed	2019-02-06		30721332		10.1007/s00063-019-0533-3
2017	Obling L, Wiberg S, Møller JE, Hassager C, Terkelsen CJ, Holmvang L, Aarøe J, Møller-Sørensen H, Fjølner J, Rudolph SS, Kjaergaard J.	[Extracorporeal cardiopulmonary resuscitation for patients with out-of-hospital refractory cardiac arrest]	29084620	Danmark			Other language	0	0							Obling L, Wiberg S, Møller JE, Hassager C, Terkelsen CJ, Holmvang L, Aarøe J, Møller-Sørensen H, Fjølner J, Rudolph SS, Kjaergaard J.		Ugeskr Laeger. 2017 Oct 30;179(44):V04170293.	Obling L	Ugeskr Laeger	2017-11-01		29084620
2018	Riessen R, Janssens U, John S, Karagiannidis C, Kluge S.	[Organ assist devices in the future : Limits and perspectives]	29632968				Other language	0	0							Riessen R, Janssens U, John S, Karagiannidis C, Kluge S.		Med Klin Intensivmed Notfmed. 2018 May;113(4):277-283. doi: 10.1007/s00063-018-0420-3. Epub 2018 Apr 9.	Riessen R	Med Klin Intensivmed Notfmed	2018-04-11		29632968		10.1007/s00063-018-0420-3
2019	Balke L, Panholzer B, Haneya A, Bewig B.	[ECMO treatment in acute lung failure : Who profits?]	31363799				Other language	0	0							Balke L, Panholzer B, Haneya A, Bewig B.		Med Klin Intensivmed Notfmed. 2019 Jul 30. doi: 10.1007/s00063-019-0597-0. Online ahead of print.	Balke L	Med Klin Intensivmed Notfmed	2019-08-01		31363799		10.1007/s00063-019-0597-0
2017	Tanaka H, Nishiyama K, Shime N.	Successful long-term extracorporeal membrane oxygenation for invasive pulmonary aspergillosis: a case report	28797271	Japan		case report	Other subject	0	0					1		Tanaka H, Nishiyama K, Shime N.		J Med Case Rep. 2017 Aug 11;11(1):220. doi: 10.1186/s13256-017-1381-5.	Tanaka H	J Med Case Rep	2017-08-12	PMC5553746	28797271		10.1186/s13256-017-1381-5
2000	Jefferson LS.	Serious and lethal respiratory tract infections of viral etiology in children	32336896				Other subject	0	0							Jefferson LS.		Semin Pediatr Infect Dis. 2000 Jan;11(1):19-24. doi: 10.1053/spid.0110019. Epub 2005 Nov 2.	Jefferson LS	Semin Pediatr Infect Dis	2020-04-28	PMC7172305	32336896		10.1053/spid.0110019
2000	Miniati DN, Robbins RC.	Mechanical support for acutely failed heart or lung grafts	11221971				Other subject	0	0							Miniati DN, Robbins RC.		J Card Surg. 2000 Mar-Apr;15(2):129-35.	Miniati DN	J Card Surg	2001-02-28		11221971
2010	Holzgraefe B, Broomé M, Kalzén H, Konrad D, Palmér K, Frenckner B.	Extracorporeal membrane oxygenation for pandemic H1N1 2009 respiratory failure	21178913				Other subject			0						Holzgraefe B, Broomé M, Kalzén H, Konrad D, Palmér K, Frenckner B.		Minerva Anestesiol. 2010 Dec;76(12):1043-51.	Holzgraefe B	Minerva Anestesiol	2010-12-24		21178913
2014	Cronin AJ.	End-of-life care in advanced kidney disease: ethical and legal issues and key challenges for black and minority ethnic groups	25185488	UK		Essay	Other subject	0	1	1		1			Not all life should be sustained. The patient’s individual, subjective perspective on quality should be focused on. Two key theoretical ethical principles underpin end-of-life care: The sanctity of life and autonomy, which can be conflicting. Informed decision making is crucial and presupposes the patient’s cognitive capacity to use the information given. In the lack of this capacity, those actin…	Cronin AJ.		J Ren Care. 2014 Sep;40 Suppl 1:16-22. doi: 10.1111/jorc.12082.	Cronin AJ	J Ren Care	2014-09-05		25185488		10.1111/jorc.12082
2017	Charlesworth M, Venkateswaran R, Barker JM, Feddy L.	Postcardiotomy VA-ECMO for refractory cardiogenic shock	29258529				Other subject	0	0	0		0				Charlesworth M, Venkateswaran R, Barker JM, Feddy L.		J Cardiothorac Surg. 2017 Dec 19;12(1):116. doi: 10.1186/s13019-017-0674-5.	Charlesworth M	J Cardiothorac Surg	2017-12-21	PMC5764222	29258529		10.1186/s13019-017-0674-5
2018	Lönnqvist PA.	The potential implications of using disability-free survival and number needed to suffer as outcome measures for neonatal intensive care	28437598				Other subject	0	0	0						Lönnqvist PA.		Acta Paediatr. 2018 Feb;107(2):200-202. doi: 10.1111/apa.13888. Epub 2017 May 19.	Lönnqvist PA	Acta Paediatr	2017-04-25		28437598		10.1111/apa.13888
2004	Medical Advisory Secretariat.	Left ventricular assist devices: an evidence-based analysis	23074453				Other subject	0	0							Medical Advisory Secretariat.		Ont Health Technol Assess Ser. 2004;4(3):1-69. Epub 2004 Mar 1.	Medical Advisory Secretariat	Ont Health Technol Assess Ser	2012-10-18	PMC3387736	23074453
2006	Gow KW, Wulkan ML, Heiss KF, Haight AE, Heard ML, Rycus P, Fortenberry JD.	Extracorporeal membrane oxygenation for support of children after hematopoietic stem cell transplantation: the Extracorporeal Life Support Organization experience	16567173				Other subject	0	0							Gow KW, Wulkan ML, Heiss KF, Haight AE, Heard ML, Rycus P, Fortenberry JD.		J Pediatr Surg. 2006 Apr;41(4):662-7. doi: 10.1016/j.jpedsurg.2005.12.006.	Gow KW	J Pediatr Surg	2006-03-29		16567173		10.1016/j.jpedsurg.2005.12.006
2014	Boffini M, Venuta F, Rea F, Colledan M, Santambrogio L, D'Armini AM, Bertani A, Voltolini L, Parisi F, Marinelli G, Nanni Costa A, Rinaldi M.	Urgent lung transplant programme in Italy: analysis of the first 14 months	25139285				Other subject	0	0							Boffini M, Venuta F, Rea F, Colledan M, Santambrogio L, D'Armini AM, Bertani A, Voltolini L, Parisi F, Marinelli G, Nanni Costa A, Rinaldi M.		Interact Cardiovasc Thorac Surg. 2014 Nov;19(5):795-800; discussion 800. doi: 10.1093/icvts/ivu257. Epub 2014 Aug 18.	Boffini M	Interact Cardiovasc Thorac Surg	2014-08-21		25139285		10.1093/icvts/ivu257
2015	Ruttenstock E, Wright N, Barrena S, Krickhahn A, Castellani C, Desai AP, Rintala R, Tovar J, Till H, Zani A, Saxena A, Davenport M.	Best oxygenation index on day 1: a reliable marker for outcome and survival in infants with congenital diaphragmatic hernia	25560249				Other subject	0	0							Ruttenstock E, Wright N, Barrena S, Krickhahn A, Castellani C, Desai AP, Rintala R, Tovar J, Till H, Zani A, Saxena A, Davenport M.		Eur J Pediatr Surg. 2015 Feb;25(1):3-8. doi: 10.1055/s-0034-1393960. Epub 2015 Jan 5.	Ruttenstock E	Eur J Pediatr Surg	2015-01-07		25560249		10.1055/s-0034-1393960
2015	Wiktor AJ, Haft JW, Bartlett RH, Park PK, Raghavendran K, Napolitano LM.	Prolonged VV ECMO (265 Days) for ARDS without technical complications	25423122	US (MI)		Case report	Other subject	0	0					1		Wiktor AJ, Haft JW, Bartlett RH, Park PK, Raghavendran K, Napolitano LM.		ASAIO J. 2015 Mar-Apr;61(2):205-6. doi: 10.1097/MAT.0000000000000181.	Wiktor AJ	ASAIO J	2014-11-26		25423122		10.1097/MAT.0000000000000181
2016	Heise CW, Skolnik AB, Raschke RA, Owen-Reece H, Graeme KA.	Two Cases of Refractory Cardiogenic Shock Secondary to Bupropion Successfully Treated with Veno-Arterial Extracorporeal Membrane Oxygenation	26856351				Other subject	0	0							Heise CW, Skolnik AB, Raschke RA, Owen-Reece H, Graeme KA.		J Med Toxicol. 2016 Sep;12(3):301-4. doi: 10.1007/s13181-016-0539-7. Epub 2016 Feb 8.	Heise CW	J Med Toxicol	2016-02-10	PMC4996782	26856351		10.1007/s13181-016-0539-7
2016	Morin L, Ray S, Wilson C, Remy S, Benissa MR, Jansen NJG, Javouhey E, Peters MJ, Kneyber M, De Luca D, Nadel S, Schlapbach LJ, Maclaren G, Tissieres P; ESPNIC Refractory Septic Shock Definition Taskforce the Infection Systemic Inflammation Sepsis section of ESPNIC .	Refractory septic shock in children: a European Society of Paediatric and Neonatal Intensive Care definition	27709263			Delphi study	Other subject	0	0							Morin L, Ray S, Wilson C, Remy S, Benissa MR, Jansen NJG, Javouhey E, Peters MJ, Kneyber M, De Luca D, Nadel S, Schlapbach LJ, Maclaren G, Tissieres P; ESPNIC Refractory Septic Shock Definition Taskforce the Infection Systemic Inflammation Sepsis section of ESPNIC .		Intensive Care Med. 2016 Dec;42(12):1948-1957. doi: 10.1007/s00134-016-4574-2. Epub 2016 Oct 5.	Morin L	Intensive Care Med	2016-10-07	PMC5106490	27709263		10.1007/s00134-016-4574-2
2016	Ouweneel DM, Schotborgh JV, Limpens J, Sjauw KD, Engström AE, Lagrand WK, Cherpanath TGV, Driessen AHG, de Mol BAJM, Henriques JPS.	Extracorporeal life support during cardiac arrest and cardiogenic shock: a systematic review and meta-analysis	27647331	Netherlands		Review	Other subject	0	1							Ouweneel DM, Schotborgh JV, Limpens J, Sjauw KD, Engström AE, Lagrand WK, Cherpanath TGV, Driessen AHG, de Mol BAJM, Henriques JPS.		Intensive Care Med. 2016 Dec;42(12):1922-1934. doi: 10.1007/s00134-016-4536-8. Epub 2016 Sep 19.	Ouweneel DM	Intensive Care Med	2016-09-21	PMC5106498	27647331		10.1007/s00134-016-4536-8
2017	Adachi Y, Kinoshita O, Hatano M, Shintani Y, Naito N, Kimura M, Nawata K, Nitta D, Maki H, Ueda K, Amiya E, Takimoto E, Komuro I, Ono M.	Successful bridge to recovery in fulminant myocarditis using a biventricular assist device: a case report	29061186				Other subject	0	0		0					Adachi Y, Kinoshita O, Hatano M, Shintani Y, Naito N, Kimura M, Nawata K, Nitta D, Maki H, Ueda K, Amiya E, Takimoto E, Komuro I, Ono M.		J Med Case Rep. 2017 Oct 24;11(1):295. doi: 10.1186/s13256-017-1466-1.	Adachi Y	J Med Case Rep	2017-10-25	PMC5654049	29061186		10.1186/s13256-017-1466-1
2017	Akin S, Dos Reis Miranda D, Caliskan K, Soliman OI, Guven G, Struijs A, van Thiel RJ, Jewbali LS, Lima A, Gommers D, Zijlstra F, Ince C.	Functional evaluation of sublingual microcirculation indicates successful weaning from VA-ECMO in cardiogenic shock	29073930				Other subject	0	0							Akin S, Dos Reis Miranda D, Caliskan K, Soliman OI, Guven G, Struijs A, van Thiel RJ, Jewbali LS, Lima A, Gommers D, Zijlstra F, Ince C.		Crit Care. 2017 Oct 26;21(1):265. doi: 10.1186/s13054-017-1855-2.	Akin S	Crit Care	2017-10-28	PMC5658964	29073930		10.1186/s13054-017-1855-2
2017	Aronson S, Nisbet P, Bunke M.	Fluid resuscitation practices in cardiac surgery patients in the USA: a survey of health care providers	29075482				Other subject	0	0							Aronson S, Nisbet P, Bunke M.		Perioper Med (Lond). 2017 Oct 19;6:15. doi: 10.1186/s13741-017-0071-6. eCollection 2017.	Aronson S	Perioper Med (Lond)	2017-10-28	PMC5649061	29075482		10.1186/s13741-017-0071-6
2017	Carlsen AW, Skjaervold NK, Berg NJ, Karlsen Ø, Gunnarson E, Wahba A.	Swedish-Norwegian co-operation in the treatment of three hypothermia victims: a case report	28716150				Other subject	0	0							Carlsen AW, Skjaervold NK, Berg NJ, Karlsen Ø, Gunnarson E, Wahba A.		Scand J Trauma Resusc Emerg Med. 2017 Jul 17;25(1):73. doi: 10.1186/s13049-017-0418-5.	Carlsen AW	Scand J Trauma Resusc Emerg Med	2017-07-19	PMC5514463	28716150		10.1186/s13049-017-0418-5
2017	Chiumello D, Brochard L, Marini JJ, Slutsky AS, Mancebo J, Ranieri VM, Thompson BT, Papazian L, Schultz MJ, Amato M, Gattinoni L, Mercat A, Pesenti A, Talmor D, Vincent JL.	Respiratory support in patients with acute respiratory distress syndrome: an expert opinion	28899408				Other subject	0	0			0				Chiumello D, Brochard L, Marini JJ, Slutsky AS, Mancebo J, Ranieri VM, Thompson BT, Papazian L, Schultz MJ, Amato M, Gattinoni L, Mercat A, Pesenti A, Talmor D, Vincent JL.		Crit Care. 2017 Sep 12;21(1):240. doi: 10.1186/s13054-017-1820-0.	Chiumello D	Crit Care	2017-09-14	PMC5596474	28899408		10.1186/s13054-017-1820-0
2017	He H, Wang H, Li X, Tang X, Wang R, Sun B, Tong Z.	Successful rescue combination of extracorporeal membrane oxygenation, high-frequency oscillatory ventilation and prone positioning for the management of severe methicillin-resistant Staphylococcus aureus pneumonia complicated by pneumothorax: a case report and literature review	28728546				Other subject	0	0							He H, Wang H, Li X, Tang X, Wang R, Sun B, Tong Z.		BMC Pulm Med. 2017 Jul 20;17(1):103. doi: 10.1186/s12890-017-0445-z.	He H	BMC Pulm Med	2017-07-22	PMC5520331	28728546		10.1186/s12890-017-0445-z
2017	Hilder M, Herbstreit F, Adamzik M, Beiderlinden M, Bürschen M, Peters J, Frey UH.	Comparison of mortality prediction models in acute respiratory distress syndrome undergoing extracorporeal membrane oxygenation and development of a novel prediction score: the PREdiction of Survival on ECMO Therapy-Score (PRESET-Score)	29233160				Other subject	0	0							Hilder M, Herbstreit F, Adamzik M, Beiderlinden M, Bürschen M, Peters J, Frey UH.		Crit Care. 2017 Dec 12;21(1):301. doi: 10.1186/s13054-017-1888-6.	Hilder M	Crit Care	2017-12-14	PMC5728043	29233160		10.1186/s13054-017-1888-6
2017	Karagiannidis C, Strassmann S, Brodie D, Ritter P, Larsson A, Borchardt R, Windisch W.	Impact of membrane lung surface area and blood flow on extracorporeal CO(2) removal during severe respiratory acidosis	28766276				Other subject	0	0							Karagiannidis C, Strassmann S, Brodie D, Ritter P, Larsson A, Borchardt R, Windisch W.		Intensive Care Med Exp. 2017 Dec;5(1):34. doi: 10.1186/s40635-017-0147-0. Epub 2017 Aug 1.	Karagiannidis C	Intensive Care Med Exp	2017-08-03	PMC5539069	28766276		10.1186/s40635-017-0147-0
2017	Khorsandi M, Dougherty S, Bouamra O, Pai V, Curry P, Tsui S, Clark S, Westaby S, Al-Attar N, Zamvar V.	Extra-corporeal membrane oxygenation for refractory cardiogenic shock after adult cardiac surgery: a systematic review and meta-analysis	28716039				Other subject	0	0							Khorsandi M, Dougherty S, Bouamra O, Pai V, Curry P, Tsui S, Clark S, Westaby S, Al-Attar N, Zamvar V.		J Cardiothorac Surg. 2017 Jul 17;12(1):55. doi: 10.1186/s13019-017-0618-0.	Khorsandi M	J Cardiothorac Surg	2017-07-19	PMC5512816	28716039		10.1186/s13019-017-0618-0
2017	Kiefer J, Freundlich RE.	Confounding variables impacting the association between duration of veno-arterial extracorporeal life support and mortality	28764805				Other subject	0	0							Kiefer J, Freundlich RE.		Crit Care. 2017 Aug 1;21(1):203. doi: 10.1186/s13054-017-1773-3.	Kiefer J	Crit Care	2017-08-03	PMC5539615	28764805		10.1186/s13054-017-1773-3
2017	Lakshminrusimha S, Keszler M, Kirpalani H, Van Meurs K, Chess P, Ambalavanan N, Yoder B, Fraga MV, Hedrick H, Lally KP, Nelin L, Cotten M, Klein J, Guilford S, Williams A, Chaudhary A, Gantz M, Gabrio J, Chowdhury D, Zaterka-Baxter K, Das A, Higgins RD.	Milrinone in congenital diaphragmatic hernia - a randomized pilot trial: study protocol, review of literature and survey of current practices	29209510				Other subject	0	0							Lakshminrusimha S, Keszler M, Kirpalani H, Van Meurs K, Chess P, Ambalavanan N, Yoder B, Fraga MV, Hedrick H, Lally KP, Nelin L, Cotten M, Klein J, Guilford S, Williams A, Chaudhary A, Gantz M, Gabrio J, Chowdhury D, Zaterka-Baxter K, Das A, Higgins RD.		Matern Health Neonatol Perinatol. 2017 Nov 27;3:27. doi: 10.1186/s40748-017-0066-9. eCollection 2017.	Lakshminrusimha S	Matern Health Neonatol Perinatol	2017-12-07	PMC5704584	29209510		10.1186/s40748-017-0066-9
2017	Larsson M, Forsman P, Hedenqvist P, Östlund A, Hultman J, Wikman A, Riddez L, Frenckner B, Bottai M, Wahlgren CM.	Extracorporeal membrane oxygenation improves coagulopathy in an experimental traumatic hemorrhagic model	27815579				Other subject	0	0							Larsson M, Forsman P, Hedenqvist P, Östlund A, Hultman J, Wikman A, Riddez L, Frenckner B, Bottai M, Wahlgren CM.		Eur J Trauma Emerg Surg. 2017 Oct;43(5):701-709. doi: 10.1007/s00068-016-0730-1. Epub 2016 Nov 4.	Larsson M	Eur J Trauma Emerg Surg	2016-11-06	PMC5629226	27815579		10.1007/s00068-016-0730-1
2017	Numata G, Kodera S, Kiriyama H, Nakayama A, Amiya E, Kiyosue A, Hatano M, Takimoto E, Watanabe M, Komuro I.	Usefulness of central venous saturation as a predictor of thiamine deficiency in critically ill patients: a case report	29142756				Other subject	0	0							Numata G, Kodera S, Kiriyama H, Nakayama A, Amiya E, Kiyosue A, Hatano M, Takimoto E, Watanabe M, Komuro I.		J Intensive Care. 2017 Nov 6;5:61. doi: 10.1186/s40560-017-0255-7. eCollection 2017.	Numata G	J Intensive Care	2017-11-17	PMC5674760	29142756		10.1186/s40560-017-0255-7
2017	Passmore MR, Fung YL, Simonova G, Foley SR, Diab SD, Dunster KR, Spanevello MM, McDonald CI, Tung JP, Pecheniuk NM, Hay K, Shekar K, Fraser JF.	Evidence of altered haemostasis in an ovine model of venovenous extracorporeal membrane oxygenation support	28754139				Other subject	0	0							Passmore MR, Fung YL, Simonova G, Foley SR, Diab SD, Dunster KR, Spanevello MM, McDonald CI, Tung JP, Pecheniuk NM, Hay K, Shekar K, Fraser JF.		Crit Care. 2017 Jul 29;21(1):191. doi: 10.1186/s13054-017-1788-9.	Passmore MR	Crit Care	2017-07-30	PMC5534117	28754139		10.1186/s13054-017-1788-9
2017	Schneider TM, Bence T, Brettner F.	"Awake" ECCO(2)R superseded intubation in a near-fatal asthma attack	28808576				Other subject	0	0							Schneider TM, Bence T, Brettner F.		J Intensive Care. 2017 Aug 8;5:53. doi: 10.1186/s40560-017-0247-7. eCollection 2017.	Schneider TM	J Intensive Care	2017-08-16	PMC5549394	28808576		10.1186/s40560-017-0247-7
2017	Sladen RN.	New Innovations in Circulatory Support With Ventricular Assist Device and Extracorporeal Membrane Oxygenation Therapy	27984228				Other subject	0	0							Sladen RN.		Anesth Analg. 2017 Apr;124(4):1071-1086. doi: 10.1213/ANE.0000000000001629.	Sladen RN	Anesth Analg	2016-12-17		27984228		10.1213/ANE.0000000000001629
2017	Wada D, Hayakawa K, Kanayama S, Maruyama S, Iwamura H, Miyama N, Saito F, Nakamori Y, Kuwagata Y.	A case of blunt thoracic aortic injury requiring ECMO for acute malperfusion before TEVAR	29166938				Other subject	0	0							Wada D, Hayakawa K, Kanayama S, Maruyama S, Iwamura H, Miyama N, Saito F, Nakamori Y, Kuwagata Y.		Scand J Trauma Resusc Emerg Med. 2017 Nov 22;25(1):110. doi: 10.1186/s13049-017-0456-z.	Wada D	Scand J Trauma Resusc Emerg Med	2017-11-24	PMC5700754	29166938		10.1186/s13049-017-0456-z
2017	Wu MY, Chang YS, Huang CC, Wu TI, Lin PJ.	The impacts of baseline ventilator parameters on hospital mortality in acute respiratory distress syndrome treated with venovenous extracorporeal membrane oxygenation: a retrospective cohort study	29221484				Other subject	0	0							Wu MY, Chang YS, Huang CC, Wu TI, Lin PJ.		BMC Pulm Med. 2017 Dec 8;17(1):181. doi: 10.1186/s12890-017-0520-5.	Wu MY	BMC Pulm Med	2017-12-10	PMC5723060	29221484		10.1186/s12890-017-0520-5
2017	Wu Y, Zhu LF, Luo Y.	Development and current clinical application of ventricular assist devices in China	29119731				Other subject	0	0							Wu Y, Zhu LF, Luo Y.		J Zhejiang Univ Sci B. 2017 Nov.;18(11):934-945. doi: 10.1631/jzus.B1600405.	Wu Y	J Zhejiang Univ Sci B	2017-11-10	PMC5696312	29119731		10.1631/jzus.B1600405
2017	Yamagishi T, Kashiura M, Sugiyama K, Nakamura K, Ishida T, Yukawa T, Miyazaki K, Tanabe T, Hamabe Y.	Chest compression-related fatal internal mammary artery injuries manifesting after venoarterial extracorporeal membrane oxygenation: a case series	29126457				Other subject	0	0							Yamagishi T, Kashiura M, Sugiyama K, Nakamura K, Ishida T, Yukawa T, Miyazaki K, Tanabe T, Hamabe Y.		J Med Case Rep. 2017 Nov 11;11(1):318. doi: 10.1186/s13256-017-1485-y.	Yamagishi T	J Med Case Rep	2017-11-12	PMC5681756	29126457		10.1186/s13256-017-1485-y
2017	Yeo HJ, Kim D, Jeon D, Kim YS, Rycus P, Cho WH.	Extracorporeal membrane oxygenation for life-threatening asthma refractory to mechanical ventilation: analysis of the Extracorporeal Life Support Organization registry	29212551				Other subject	0	0			0				Yeo HJ, Kim D, Jeon D, Kim YS, Rycus P, Cho WH.		Crit Care. 2017 Dec 6;21(1):297. doi: 10.1186/s13054-017-1886-8.	Yeo HJ	Crit Care	2017-12-08	PMC5719729	29212551		10.1186/s13054-017-1886-8
2018	Alqatari S, Riddell P, Harney S, Henry M, Murphy G.	MDA-5 associated rapidly progressive interstitial lung disease with recurrent Pneumothoraces: a case report	29665800				Other subject	0	0							Alqatari S, Riddell P, Harney S, Henry M, Murphy G.		BMC Pulm Med. 2018 Apr 17;18(1):59. doi: 10.1186/s12890-018-0622-8.	Alqatari S	BMC Pulm Med	2018-04-19	PMC5905122	29665800		10.1186/s12890-018-0622-8
2018	Ankawi G, Neri M, Zhang J, Breglia A, Ricci Z, Ronco C.	Extracorporeal techniques for the treatment of critically ill patients with sepsis beyond conventional blood purification therapy: the promises and the pitfalls	30360755				Other subject	0	0							Ankawi G, Neri M, Zhang J, Breglia A, Ricci Z, Ronco C.		Crit Care. 2018 Oct 25;22(1):262. doi: 10.1186/s13054-018-2181-z.	Ankawi G	Crit Care	2018-10-27	PMC6202855	30360755		10.1186/s13054-018-2181-z
2018	Balci D, Ozcelik M, Kirimker EO, Cetinkaya A, Ustuner E, Cakici M, Inan B, Alanoglu Z, Bilgic S, Akar AR.	Extended left hepatectomy for intrahepatic cholangiocarcinoma: hepatic vein reconstruction with in-situ hypothermic perfusion and extracorporeal membrane oxygenation	29386002				Other subject	0	0							Balci D, Ozcelik M, Kirimker EO, Cetinkaya A, Ustuner E, Cakici M, Inan B, Alanoglu Z, Bilgic S, Akar AR.		BMC Surg. 2018 Jan 31;18(1):7. doi: 10.1186/s12893-018-0342-2.	Balci D	BMC Surg	2018-02-02	PMC5793354	29386002		10.1186/s12893-018-0342-2
2018	Booka E, Kitano M, Nakano Y, Mihara K, Nishiya S, Nishiyama R, Shibutani S, Egawa T, Nagashima A.	Life-threatening giant esophageal neurofibroma with severe tracheal stenosis: a case report	30178113				Other subject	0	0							Booka E, Kitano M, Nakano Y, Mihara K, Nishiya S, Nishiyama R, Shibutani S, Egawa T, Nagashima A.		Surg Case Rep. 2018 Sep 3;4(1):107. doi: 10.1186/s40792-018-0517-1.	Booka E	Surg Case Rep	2018-09-05	PMC6120858	30178113		10.1186/s40792-018-0517-1
2018	Bull T, Corley A, Smyth DJ, McMillan DJ, Dunster KR, Fraser JF.	Extracorporeal membrane oxygenation line-associated complications: in vitro testing of cyanoacrylate tissue adhesive and securement devices to prevent infection and dislodgement	29532189				Other subject	0	0							Bull T, Corley A, Smyth DJ, McMillan DJ, Dunster KR, Fraser JF.		Intensive Care Med Exp. 2018 Mar 12;6(1):6. doi: 10.1186/s40635-018-0171-8.	Bull T	Intensive Care Med Exp	2018-03-14	PMC5847637	29532189		10.1186/s40635-018-0171-8
2018	Bunya N, Sawamoto K, Kakizaki R, Wada K, Katayama Y, Mizuno H, Inoue H, Uemura S, Harada K, Narimatsu E.	Successful resuscitation for cardiac arrest due to severe accidental hypothermia accompanied by mandibular rigidity: a case of cold stiffening mimicking rigor mortis	31179929				Other subject	0	0							Bunya N, Sawamoto K, Kakizaki R, Wada K, Katayama Y, Mizuno H, Inoue H, Uemura S, Harada K, Narimatsu E.		Int J Emerg Med. 2018 Nov 14;11(1):46. doi: 10.1186/s12245-018-0205-8.	Bunya N	Int J Emerg Med	2019-06-11	PMC6326142	31179929		10.1186/s12245-018-0205-8
2018	Cavayas YA, Yusuff H, Porter R.	Fungal infections in adult patients on extracorporeal life support	29665838				Other subject	0	0							Cavayas YA, Yusuff H, Porter R.		Crit Care. 2018 Apr 17;22(1):98. doi: 10.1186/s13054-018-2023-z.	Cavayas YA	Crit Care	2018-04-19	PMC5905180	29665838		10.1186/s13054-018-2023-z
2018	Charlesworth M, Barker JM, Greenhalgh D, Ashworth AD.	Perioperative Extracorporeal Cardiopulmonary Resuscitation: The Defibrillator of the 21st Century?: A Case Report	29634540				Other subject	0	0							Charlesworth M, Barker JM, Greenhalgh D, Ashworth AD.		A A Pract. 2018 Aug 15;11(4):87-89. doi: 10.1213/XAA.0000000000000742.	Charlesworth M	A A Pract	2018-04-11		29634540		10.1213/XAA.0000000000000742
2018	Chu GCW, Lazare K, Sullivan F.	Serum and blood based biomarkers for lung cancer screening: a systematic review	29439651				Other subject	0	0			0				Chu GCW, Lazare K, Sullivan F.		BMC Cancer. 2018 Feb 13;18(1):181. doi: 10.1186/s12885-018-4024-3.	Chu GCW	BMC Cancer	2018-02-15	PMC5812229	29439651		10.1186/s12885-018-4024-3
2018	Cioccari L, Zante B, Bloch A, Berger D, Limacher A, Jakob SM, Takala J, Merz TM.	Effects of hemodynamic monitoring using a single-use transesophageal echocardiography probe in critically ill patients - study protocol for a randomized controlled trial	29980233				Other subject	0	0			0				Cioccari L, Zante B, Bloch A, Berger D, Limacher A, Jakob SM, Takala J, Merz TM.		Trials. 2018 Jul 6;19(1):362. doi: 10.1186/s13063-018-2714-4.	Cioccari L	Trials	2018-07-08	PMC6035404	29980233		10.1186/s13063-018-2714-4
2018	Combes A, Bréchot N, Luyt CE, Schmidt M.	Indications for extracorporeal support: why do we need the results of the EOLIA trial?	29149363				Other subject	0	0			0				Combes A, Bréchot N, Luyt CE, Schmidt M.		Med Klin Intensivmed Notfmed. 2018 Feb;113(Suppl 1):21-25. doi: 10.1007/s00063-017-0371-0. Epub 2017 Nov 17.	Combes A	Med Klin Intensivmed Notfmed	2017-11-18		29149363		10.1007/s00063-017-0371-0
2018	Cooray SD, Heerasing NM, Selkrig LA, Subramaniam VN, Hamblin PS, McDonald CJ, McLean CA, McNamara E, Leet AS, Roberts SK.	Reversal of end-stage heart failure in juvenile hemochromatosis with iron chelation therapy: a case report	29373985				Other subject	0	0			0				Cooray SD, Heerasing NM, Selkrig LA, Subramaniam VN, Hamblin PS, McDonald CJ, McLean CA, McNamara E, Leet AS, Roberts SK.		J Med Case Rep. 2018 Jan 26;12(1):18. doi: 10.1186/s13256-017-1526-6.	Cooray SD	J Med Case Rep	2018-01-28	PMC5787235	29373985		10.1186/s13256-017-1526-6
2018	Cortina G, Neu N, Kropshofer G, Meister B, Klingkowski U, Crazzolara R.	Extracorporeal membrane oxygenation offers long-term survival in childhood leukemia and acute respiratory failure	30241492				Other subject	0	0			0				Cortina G, Neu N, Kropshofer G, Meister B, Klingkowski U, Crazzolara R.		Crit Care. 2018 Sep 22;22(1):222. doi: 10.1186/s13054-018-2134-6.	Cortina G	Crit Care	2018-09-23	PMC6151048	30241492		10.1186/s13054-018-2134-6
2018	Crippa IA, Subirà C, Vincent JL, Fernandez RF, Hernandez SC, Cavicchi FZ, Creteur J, Taccone FS.	Impaired cerebral autoregulation is associated with brain dysfunction in patients with sepsis	30514349				Other subject	0	0			1				Crippa IA, Subirà C, Vincent JL, Fernandez RF, Hernandez SC, Cavicchi FZ, Creteur J, Taccone FS.		Crit Care. 2018 Dec 4;22(1):327. doi: 10.1186/s13054-018-2258-8.	Crippa IA	Crit Care	2018-12-06	PMC6280405	30514349		10.1186/s13054-018-2258-8
2018	Cucchiari D, Reverter E, Blasco M, Molina-Andujar A, Carpio A, Sanz M, Escorsell A, Fernández J, Poch E.	High cut-off membrane for in-vivo dialysis of free plasma hemoglobin in a patient with massive hemolysis	30286730				Other subject	0	0			0				Cucchiari D, Reverter E, Blasco M, Molina-Andujar A, Carpio A, Sanz M, Escorsell A, Fernández J, Poch E.		BMC Nephrol. 2018 Oct 4;19(1):250. doi: 10.1186/s12882-018-1051-x.	Cucchiari D	BMC Nephrol	2018-10-06	PMC6172805	30286730		10.1186/s12882-018-1051-x
2018	El Sibai R, Bachir R, El Sayed M.	ECMO use and mortality in adult patients with cardiogenic shock: a retrospective observational study in U.S. hospitals	29973150				Other subject	0	0							El Sibai R, Bachir R, El Sayed M.		BMC Emerg Med. 2018 Jul 4;18(1):20. doi: 10.1186/s12873-018-0171-8.	El Sibai R	BMC Emerg Med	2018-07-06	PMC6031192	29973150		10.1186/s12873-018-0171-8
2018	Farrokh S, Tahsili-Fahadan P, Ritzl EK, Lewin JJ 3rd, Mirski MA.	Antiepileptic drugs in critically ill patients	29880020				Other subject	0	0							Farrokh S, Tahsili-Fahadan P, Ritzl EK, Lewin JJ 3rd, Mirski MA.		Crit Care. 2018 Jun 7;22(1):153. doi: 10.1186/s13054-018-2066-1.	Farrokh S	Crit Care	2018-06-09	PMC5992651	29880020		10.1186/s13054-018-2066-1
2018	Faverio P, De Giacomi F, Sardella L, Fiorentino G, Carone M, Salerno F, Ora J, Rogliani P, Pellegrino G, Sferrazza Papa GF, Bini F, Bodini BD, Messinesi G, Pesci A, Esquinas A.	Management of acute respiratory failure in interstitial lung diseases: overview and clinical insights	29764401				Other subject	0	0							Faverio P, De Giacomi F, Sardella L, Fiorentino G, Carone M, Salerno F, Ora J, Rogliani P, Pellegrino G, Sferrazza Papa GF, Bini F, Bodini BD, Messinesi G, Pesci A, Esquinas A.		BMC Pulm Med. 2018 May 15;18(1):70. doi: 10.1186/s12890-018-0643-3.	Faverio P	BMC Pulm Med	2018-05-17	PMC5952859	29764401		10.1186/s12890-018-0643-3
2018	Frenckner B, Broman M, Broomé M.	Position of draining venous cannula in extracorporeal membrane oxygenation for respiratory and respiratory/circulatory support in adult patients	29907121				Other subject	0	0							Frenckner B, Broman M, Broomé M.		Crit Care. 2018 Jun 15;22(1):163. doi: 10.1186/s13054-018-2083-0.	Frenckner B	Crit Care	2018-06-17	PMC6003129	29907121		10.1186/s13054-018-2083-0
2018	Fukushima N, Tatsumi E, Seguchi O, Takewa Y, Hamasaki T, Onda K, Yamamoto H, Hayashi T, Fujita T, Kobayashi J.	Assessment of Safety and Effectiveness of the Extracorporeal Continuous-Flow Ventricular Assist Device (BR16010) Use as a Bridge-to-Decision Therapy for Severe Heart Failure or Refractory Cardiogenic Shock: Study Protocol for Single-Arm Non-randomized, Uncontrolled, and Investigator-Initiated Clinical Trial	29948739				Other subject	0	0							Fukushima N, Tatsumi E, Seguchi O, Takewa Y, Hamasaki T, Onda K, Yamamoto H, Hayashi T, Fujita T, Kobayashi J.		Cardiovasc Drugs Ther. 2018 Aug;32(4):373-379. doi: 10.1007/s10557-018-6796-8.	Fukushima N	Cardiovasc Drugs Ther	2018-06-28	PMC6133189	29948739		10.1007/s10557-018-6796-8
2018	Gatzweiler E, Hoppe B, Dewald O, Berg C, Müller A, Reutter H, Kipfmueller F.	Extracorporeal membrane oxygenation support in a newborn with lower urinary tract obstruction and pulmonary hypoplasia: a case report	30012211				Other subject	0	0							Gatzweiler E, Hoppe B, Dewald O, Berg C, Müller A, Reutter H, Kipfmueller F.		J Med Case Rep. 2018 Jul 17;12(1):210. doi: 10.1186/s13256-018-1749-1.	Gatzweiler E	J Med Case Rep	2018-07-18	PMC6048767	30012211		10.1186/s13256-018-1749-1
2018	Gennari M, Polvani G, Pepi M, Arlati F, Annoni A, Agrifoglio M.	Late thrombosis of a Transcatheter aortic valve: the border between a proactive and reactive management	30558628				Other subject	0	0							Gennari M, Polvani G, Pepi M, Arlati F, Annoni A, Agrifoglio M.		J Cardiothorac Surg. 2018 Dec 17;13(1):126. doi: 10.1186/s13019-018-0816-4.	Gennari M	J Cardiothorac Surg	2018-12-19	PMC6296042	30558628		10.1186/s13019-018-0816-4
2018	Huang L, Zhang W, Yang Y, Wu W, Lu W, Xue H, Zhao H, Wu Y, Shang J, Cai L, Liu L, Liu D, Wang Y, Cao B, Zhan Q, Wang C.	Application of extracorporeal membrane oxygenation in patients with severe acute respiratory distress syndrome induced by avian influenza A (H7N9) viral pneumonia: national data from the Chinese multicentre collaboration	29310581				Other subject	0	0							Huang L, Zhang W, Yang Y, Wu W, Lu W, Xue H, Zhao H, Wu Y, Shang J, Cai L, Liu L, Liu D, Wang Y, Cao B, Zhan Q, Wang C.		BMC Infect Dis. 2018 Jan 8;18(1):23. doi: 10.1186/s12879-017-2903-x.	Huang L	BMC Infect Dis	2018-01-10	PMC5759204	29310581		10.1186/s12879-017-2903-x
2018	Jahns FP, Ben-Hamouda N, Kirsch M, Roumy A, Liaudet L.	Intravenous zanamivir for influenza myocarditis and enteral malabsorption	30514347				Other subject	0	0							Jahns FP, Ben-Hamouda N, Kirsch M, Roumy A, Liaudet L.		Crit Care. 2018 Dec 4;22(1):332. doi: 10.1186/s13054-018-2263-y.	Jahns FP	Crit Care	2018-12-06	PMC6280537	30514347		10.1186/s13054-018-2263-y
2018	Jin CN, Tang LL.	Muscle weakness associated with H7N9 infection: report of two cases	30572825				Other subject	0	0							Jin CN, Tang LL.		BMC Infect Dis. 2018 Dec 20;18(1):685. doi: 10.1186/s12879-018-3592-9.	Jin CN	BMC Infect Dis	2018-12-22	PMC6302428	30572825		10.1186/s12879-018-3592-9
2018	Joyce CJ, Shekar K, Cook DA.	A mathematical model of CO(2), O(2) and N(2) exchange during venovenous extracorporeal membrane oxygenation	30094654				Other subject	0	0							Joyce CJ, Shekar K, Cook DA.		Intensive Care Med Exp. 2018 Aug 9;6(1):25. doi: 10.1186/s40635-018-0183-4.	Joyce CJ	Intensive Care Med Exp	2018-08-11	PMC6085277	30094654		10.1186/s40635-018-0183-4
2018	Kim H, Paek JH, Song JH, Lee H, Jhee JH, Park S, Yun HR, Kee YK, Han SH, Yoo TH, Kang SW, Kim S, Park JT.	Permissive fluid volume in adult patients undergoing extracorporeal membrane oxygenation treatment	30367643				Other subject	0	0							Kim H, Paek JH, Song JH, Lee H, Jhee JH, Park S, Yun HR, Kee YK, Han SH, Yoo TH, Kang SW, Kim S, Park JT.		Crit Care. 2018 Oct 27;22(1):270. doi: 10.1186/s13054-018-2211-x.	Kim H	Crit Care	2018-10-28	PMC6203979	30367643		10.1186/s13054-018-2211-x
2018	Lönnqvist PA.	A different perspective: anesthesia for extreme premature infants: is there an age limitation or how low should we go?	29474212	Sweden			Other subject	0	0							Lönnqvist PA.		Curr Opin Anaesthesiol. 2018 Jun;31(3):308-312. doi: 10.1097/ACO.0000000000000581.	Lönnqvist PA	Curr Opin Anaesthesiol	2018-02-24		29474212		10.1097/ACO.0000000000000581
2018	Marchioni A, Tonelli R, Ball L, Fantini R, Castaniere I, Cerri S, Luppi F, Malerba M, Pelosi P, Clini E.	Acute exacerbation of idiopathic pulmonary fibrosis: lessons learned from acute respiratory distress syndrome?	29566734				Other subject	0	0							Marchioni A, Tonelli R, Ball L, Fantini R, Castaniere I, Cerri S, Luppi F, Malerba M, Pelosi P, Clini E.		Crit Care. 2018 Mar 23;22(1):80. doi: 10.1186/s13054-018-2002-4.	Marchioni A	Crit Care	2018-03-24	PMC5865285	29566734		10.1186/s13054-018-2002-4
2018	Mongardon N, Constant O, Taccone FS, Levesque E.	Appraisal of fungal infections during ECMO therapy	29871652				Other subject	0	0							Mongardon N, Constant O, Taccone FS, Levesque E.		Crit Care. 2018 Jun 6;22(1):145. doi: 10.1186/s13054-018-2082-1.	Mongardon N	Crit Care	2018-06-07	PMC5989422	29871652		10.1186/s13054-018-2082-1
2018	Montero S, Chommeloux J, Franchineau G, Combes A, Schmidt M.	Microcirculation in cardiogenic shock supported with extracorporeal membrane oxygenation: the need for a homogeneous population and strict evolution assessment	30373656				Other subject	0	0							Montero S, Chommeloux J, Franchineau G, Combes A, Schmidt M.		Crit Care. 2018 Oct 29;22(1):281. doi: 10.1186/s13054-018-2214-7.	Montero S	Crit Care	2018-10-31	PMC6206654	30373656		10.1186/s13054-018-2214-7
2018	Mungan İ, Kazancı D, Bektaş Ş, Ademoglu D, Turan S.	Does lactate clearance prognosticates outcomes in ECMO therapy: a retrospective observational study	30355289				Other subject	0	0							Mungan İ, Kazancı D, Bektaş Ş, Ademoglu D, Turan S.		BMC Anesthesiol. 2018 Oct 24;18(1):152. doi: 10.1186/s12871-018-0618-1.	Mungan İ	BMC Anesthesiol	2018-10-26	PMC6201528	30355289		10.1186/s12871-018-0618-1
2018	Nandhabalan P, Ioannou N, Meadows C, Wyncoll D.	Refractory septic shock: our pragmatic approach	30231909				Other subject	0	0							Nandhabalan P, Ioannou N, Meadows C, Wyncoll D.		Crit Care. 2018 Sep 19;22(1):215. doi: 10.1186/s13054-018-2144-4.	Nandhabalan P	Crit Care	2018-09-21	PMC6145185	30231909		10.1186/s13054-018-2144-4
2018	Ostermann M, Boldt DW, Harper MD, Lim GW, Gunnerson K.	Angiotensin in ECMO patients with refractory shock	30382926				Other subject	0	0							Ostermann M, Boldt DW, Harper MD, Lim GW, Gunnerson K.		Crit Care. 2018 Nov 1;22(1):288. doi: 10.1186/s13054-018-2225-4.	Ostermann M	Crit Care	2018-11-02	PMC6211436	30382926		10.1186/s13054-018-2225-4
2018	Rand A, Zahn PK, Schildhauer TA, Waydhas C, Hamsen U.	Inhalative sedation with small tidal volumes under venovenous ECMO	29508167				Other subject	0	0							Rand A, Zahn PK, Schildhauer TA, Waydhas C, Hamsen U.		J Artif Organs. 2018 Jun;21(2):201-205. doi: 10.1007/s10047-018-1030-9. Epub 2018 Mar 5.	Rand A	J Artif Organs	2018-03-07		29508167		10.1007/s10047-018-1030-9
2018	Rauch S, Strapazzon G, Brodmann M, Fop E, Masoner C, Rauch L, Forti A, Pietsch U, Mair P, Brugger H.	Implementation of a mechanical CPR device in a physician staffed HEMS - a prospective observational study	29704898				Other subject	0	0							Rauch S, Strapazzon G, Brodmann M, Fop E, Masoner C, Rauch L, Forti A, Pietsch U, Mair P, Brugger H.		Scand J Trauma Resusc Emerg Med. 2018 Apr 28;26(1):36. doi: 10.1186/s13049-018-0503-4.	Rauch S	Scand J Trauma Resusc Emerg Med	2018-04-30	PMC5923001	29704898		10.1186/s13049-018-0503-4
2018	Rawat M, Nangia S, Chandrasekharan P, Lakshminrusimha S.	Approach to Infants Born Through Meconium Stained Amniotic Fluid: Evolution Based on Evidence?	29341045				Other subject	0	0							Rawat M, Nangia S, Chandrasekharan P, Lakshminrusimha S.		Am J Perinatol. 2018 Jul;35(9):815-822. doi: 10.1055/s-0037-1620269. Epub 2018 Jan 16.	Rawat M	Am J Perinatol	2018-01-18		29341045		10.1055/s-0037-1620269
2018	Riley AA, Watson M, Smith C, Guffey D, Minard CG, Currier H, Akcan Arikan A.	Pediatric continuous renal replacement therapy: have practice changes changed outcomes? A large single-center ten-year retrospective evaluation	30340544				Other subject	0	0							Riley AA, Watson M, Smith C, Guffey D, Minard CG, Currier H, Akcan Arikan A.		BMC Nephrol. 2018 Oct 19;19(1):268. doi: 10.1186/s12882-018-1068-1.	Riley AA	BMC Nephrol	2018-10-21	PMC6194595	30340544		10.1186/s12882-018-1068-1
2018	Ryu JA, Lee YH, Chung CR, Cho YH, Sung K, Jeon K, Suh GY, Park TK, Lee JM, Chae MK, Hong JH, Lee SH, Kim HS, Yang JH.	Prognostic value of computed tomography score in patients after extracorporeal cardiopulmonary resuscitation	30466477				Other subject	0	0							Ryu JA, Lee YH, Chung CR, Cho YH, Sung K, Jeon K, Suh GY, Park TK, Lee JM, Chae MK, Hong JH, Lee SH, Kim HS, Yang JH.		Crit Care. 2018 Nov 22;22(1):323. doi: 10.1186/s13054-018-2101-2.	Ryu JA	Crit Care	2018-11-24	PMC6251141	30466477		10.1186/s13054-018-2101-2
2018	Sharma A, Sharma A, Acharya A, Aryal D, Rajbanshi BG, Bhattarai PR, Regmi A, Ghimire A.	Extracorporeal membrane oxygenation in aluminum phosphide poisoning in Nepal: a case report	30368248	Nepal			Other subject	0	0							Sharma A, Sharma A, Acharya A, Aryal D, Rajbanshi BG, Bhattarai PR, Regmi A, Ghimire A.		J Med Case Rep. 2018 Oct 28;12(1):311. doi: 10.1186/s13256-018-1864-z.	Sharma A	J Med Case Rep	2018-10-29	PMC6204274	30368248		10.1186/s13256-018-1864-z
2018	Touchard C, Aubry A, Eloy P, Bréchot N, Lebreton G, Franchineau G, Besset S, Hékimian G, Nieszkowska A, Leprince P, Luyt CE, Combes A, Schmidt M.	Predictors of insufficient peak amikacin concentration in critically ill patients on extracorporeal membrane oxygenation	30121083				Other subject	0	0							Touchard C, Aubry A, Eloy P, Bréchot N, Lebreton G, Franchineau G, Besset S, Hékimian G, Nieszkowska A, Leprince P, Luyt CE, Combes A, Schmidt M.		Crit Care. 2018 Aug 19;22(1):199. doi: 10.1186/s13054-018-2122-x.	Touchard C	Crit Care	2018-08-20	PMC6098833	30121083		10.1186/s13054-018-2122-x
2018	Welbourn C, Efstathiou N.	How does the length of cardiopulmonary resuscitation affect brain damage in patients surviving cardiac arrest? A systematic review	30201018				Other subject	0	0							Welbourn C, Efstathiou N.		Scand J Trauma Resusc Emerg Med. 2018 Sep 10;26(1):77. doi: 10.1186/s13049-018-0476-3.	Welbourn C	Scand J Trauma Resusc Emerg Med	2018-09-12	PMC6131783	30201018		10.1186/s13049-018-0476-3
2018	Wu MY, Chou PL, Wu TI, Lin PJ.	Predictors of hospital mortality in adult trauma patients receiving extracorporeal membrane oxygenation for advanced life support: a retrospective cohort study	29422067				Other subject	0	0							Wu MY, Chou PL, Wu TI, Lin PJ.		Scand J Trauma Resusc Emerg Med. 2018 Feb 8;26(1):14. doi: 10.1186/s13049-018-0481-6.	Wu MY	Scand J Trauma Resusc Emerg Med	2018-02-10	PMC5806237	29422067		10.1186/s13049-018-0481-6
2018	Yamagishi T, Tanabe T, Fujita H, Miyazaki K, Yukawa T, Sugiyama K, Hamabe Y.	Conventional cardiopulmonary resuscitation-induced refractory cardiac arrest due to latent left ventricular outflow tract obstruction due to a sigmoid septum: a case report	30122151				Other subject	0	0							Yamagishi T, Tanabe T, Fujita H, Miyazaki K, Yukawa T, Sugiyama K, Hamabe Y.		J Med Case Rep. 2018 Aug 20;12(1):229. doi: 10.1186/s13256-018-1767-z.	Yamagishi T	J Med Case Rep	2018-08-21	PMC6100721	30122151		10.1186/s13256-018-1767-z
2018	Yeh YC, Lee CT, Wang CH, Tu YK, Lai CH, Wang YC, Chao A, Huang CH, Cheng YJ, Chen YS; NTUH Center of Microcirculation Medical Research (NCMMR).	Investigation of microcirculation in patients with venoarterial extracorporeal membrane oxygenation life support	30121090				Other subject	0	0							Yeh YC, Lee CT, Wang CH, Tu YK, Lai CH, Wang YC, Chao A, Huang CH, Cheng YJ, Chen YS; NTUH Center of Microcirculation Medical Research (NCMMR).		Crit Care. 2018 Aug 19;22(1):200. doi: 10.1186/s13054-018-2081-2.	Yeh YC	Crit Care	2018-08-20	PMC6098836	30121090		10.1186/s13054-018-2081-2
2018	Young B, Vedhara K, Kendrick D, Littleford R, Robertson JFR, Sullivan FM, Schembri S, das Nair R; ECLS study team.	Determinants of motivation to quit in smokers screened for the early detection of lung cancer: a qualitative study	30453929				Other subject	0	0			0				Young B, Vedhara K, Kendrick D, Littleford R, Robertson JFR, Sullivan FM, Schembri S, das Nair R; ECLS study team.		BMC Public Health. 2018 Nov 20;18(1):1276. doi: 10.1186/s12889-018-6211-1.	Young B	BMC Public Health	2018-11-21	PMC6245764	30453929		10.1186/s12889-018-6211-1
2019	Antonucci E, Taccone FS.	Angiotensin II in ECMO patients: a word of caution	31027494				Other subject	0	0							Antonucci E, Taccone FS.		Crit Care. 2019 Apr 26;23(1):144. doi: 10.1186/s13054-019-2337-5.	Antonucci E	Crit Care	2019-04-28	PMC6485103	31027494		10.1186/s13054-019-2337-5
2019	Baek MS, Lee SM, Chung CR, Cho WH, Cho YJ, Park S, Koo SM, Jung JS, Park SY, Chang Y, Kang BJ, Kim JH, Oh JY, Park SH, Yoo JW, Sim YS, Hong SB.	Improvement in the survival rates of extracorporeal membrane oxygenation-supported respiratory failure patients: a multicenter retrospective study in Korean patients	30606235				Other subject	0	0							Baek MS, Lee SM, Chung CR, Cho WH, Cho YJ, Park S, Koo SM, Jung JS, Park SY, Chang Y, Kang BJ, Kim JH, Oh JY, Park SH, Yoo JW, Sim YS, Hong SB.		Crit Care. 2019 Jan 3;23(1):1. doi: 10.1186/s13054-018-2293-5.	Baek MS	Crit Care	2019-01-05	PMC6318967	30606235		10.1186/s13054-018-2293-5
2019	Banga S, Challa A, Patel AR, Singh S, Emani VK.	The Patient Selection Criteria for Veno-arterial Extracorporeal Mechanical Oxygenation	31720177				Other subject	0	0			0				Banga S, Challa A, Patel AR, Singh S, Emani VK.		Cureus. 2019 Sep 20;11(9):e5709. doi: 10.7759/cureus.5709.	Banga S	Cureus	2019-11-14	PMC6823087	31720177		10.7759/cureus.5709
2019	Boehme S, Hartmann EK, Tripp T, Thal SC, David M, Abraham D, Baumgardner JE, Markstaller K, Klein KU.	PO(2) oscillations induce lung injury and inflammation	30917851				Other subject	0	0							Boehme S, Hartmann EK, Tripp T, Thal SC, David M, Abraham D, Baumgardner JE, Markstaller K, Klein KU.		Crit Care. 2019 Mar 27;23(1):102. doi: 10.1186/s13054-019-2401-1.	Boehme S	Crit Care	2019-03-29	PMC6438034	30917851		10.1186/s13054-019-2401-1
2019	Boyce DSK, Lee JW, Shah P, Freeman JH, Aboudara MC, Hostler DC.	Combined-modality therapy for pulmonary alveolar proteinosis in a remote setting: a case report	30866900				Other subject	0	0							Boyce DSK, Lee JW, Shah P, Freeman JH, Aboudara MC, Hostler DC.		BMC Pulm Med. 2019 Mar 12;19(1):61. doi: 10.1186/s12890-019-0822-x.	Boyce DSK	BMC Pulm Med	2019-03-15	PMC6417025	30866900		10.1186/s12890-019-0822-x
2019	Broman LM, Taccone FS, Lorusso R, Malfertheiner MV, Pappalardo F, Di Nardo M, Belliato M, Bembea MM, Barbaro RP, Diaz R, Grazioli L, Pellegrino V, Mendonca MH, Brodie D, Fan E, Bartlett RH, McMullan MM, Conrad SA.	The ELSO Maastricht Treaty for ECLS Nomenclature: abbreviations for cannulation configuration in extracorporeal life support - a position paper of the Extracorporeal Life Support Organization	30736845				Other subject	0	0							Broman LM, Taccone FS, Lorusso R, Malfertheiner MV, Pappalardo F, Di Nardo M, Belliato M, Bembea MM, Barbaro RP, Diaz R, Grazioli L, Pellegrino V, Mendonca MH, Brodie D, Fan E, Bartlett RH, McMullan MM, Conrad SA.		Crit Care. 2019 Feb 8;23(1):36. doi: 10.1186/s13054-019-2334-8.	Broman LM	Crit Care	2019-02-10	PMC6367794	30736845		10.1186/s13054-019-2334-8
2019	De Jong A, Verzilli D, Jaber S.	ARDS in Obese Patients: Specificities and Management	30850002				Other subject	0	0							De Jong A, Verzilli D, Jaber S.		Crit Care. 2019 Mar 9;23(1):74. doi: 10.1186/s13054-019-2374-0.	De Jong A	Crit Care	2019-03-10	PMC6408839	30850002		10.1186/s13054-019-2374-0
2019	Karagiannidis C, Strassmann S, Schwarz S, Merten M, Fan E, Beck J, Sinderby C, Windisch W.	Control of respiratory drive by extracorporeal CO(2) removal in acute exacerbation of COPD breathing on non-invasive NAVA	31014366				Other subject	0	0							Karagiannidis C, Strassmann S, Schwarz S, Merten M, Fan E, Beck J, Sinderby C, Windisch W.		Crit Care. 2019 Apr 23;23(1):135. doi: 10.1186/s13054-019-2404-y.	Karagiannidis C	Crit Care	2019-04-25	PMC6480839	31014366		10.1186/s13054-019-2404-y
2019	Ogawa F, Sakai T, Takahashi K, Kato M, Yamaguchi K, Okazaki S, Abe T, Iwashita M, Takeuchi I.	A case report: Veno-venous extracorporeal membrane oxygenation for severe blunt thoracic trauma	31060587				Other subject	0	0							Ogawa F, Sakai T, Takahashi K, Kato M, Yamaguchi K, Okazaki S, Abe T, Iwashita M, Takeuchi I.		J Cardiothorac Surg. 2019 May 6;14(1):88. doi: 10.1186/s13019-019-0908-9.	Ogawa F	J Cardiothorac Surg	2019-05-08	PMC6501329	31060587		10.1186/s13019-019-0908-9
2019	Patricio D, Peluso L, Brasseur A, Lheureux O, Belliato M, Vincent JL, Creteur J, Taccone FS.	Comparison of extracorporeal and conventional cardiopulmonary resuscitation: a retrospective propensity score matched study	30691512				Other subject	0	0							Patricio D, Peluso L, Brasseur A, Lheureux O, Belliato M, Vincent JL, Creteur J, Taccone FS.		Crit Care. 2019 Jan 28;23(1):27. doi: 10.1186/s13054-019-2320-1.	Patricio D	Crit Care	2019-01-30	PMC6348681	30691512		10.1186/s13054-019-2320-1
2019	Ramaswamy M, Anton-Martin P, Martinez LG, Muthialu N.	Tailored Management of Airway Abnormalities in Children with Congenital Single Functional Lung	30528176				Other subject	0	0							Ramaswamy M, Anton-Martin P, Martinez LG, Muthialu N.		J Pediatr Surg. 2019 Apr;54(4):696-700. doi: 10.1016/j.jpedsurg.2018.10.057. Epub 2018 Oct 30.	Ramaswamy M	J Pediatr Surg	2018-12-12		30528176		10.1016/j.jpedsurg.2018.10.057
2020	Azoulay É, de Castro N, Barbier F.	Critically Ill Patients With HIV: 40 Years Later	31421114				Other subject	0	0							Azoulay É, de Castro N, Barbier F.		Chest. 2020 Feb;157(2):293-309. doi: 10.1016/j.chest.2019.08.002. Epub 2019 Aug 14.	Azoulay É	Chest	2019-08-18		31421114		10.1016/j.chest.2019.08.002
2020	Baez Hernandez N, Kirk R, Davies R, Roumillat J, Sutcliffe D, Bano M, Butts R.	Heart transplantation in an infant with Williams-Beuren syndrome and rapidly progressive ischemic cardiomyopathy	32112495				Other subject	0	0							Baez Hernandez N, Kirk R, Davies R, Roumillat J, Sutcliffe D, Bano M, Butts R.		Pediatr Transplant. 2020 Jun;24(4):e13688. doi: 10.1111/petr.13688. Epub 2020 Feb 29.	Baez Hernandez N	Pediatr Transplant	2020-03-01		32112495		10.1111/petr.13688
2020	Brandi G, Drewniak D, Buehler PK, Budilivschi A, Steiger P, Krones T.	Indications and contraindications for extracorporeal life support for severe heart or lung failure: a systematic review	32755087				Other subject	0	0		0	0				Brandi G, Drewniak D, Buehler PK, Budilivschi A, Steiger P, Krones T.		Minerva Anestesiol. 2020 Aug 4. doi: 10.23736/S0375-9393.20.14513-9. Online ahead of print.	Brandi G	Minerva Anestesiol	2020-08-06		32755087		10.23736/S0375-9393.20.14513-9
2020	Chen JY, Qiao K, Liu F, Wu B, Xu X, Jiao GQ, Lu RG, Li HX, Zhao J, Huang J, Yang Y, Lu XJ, Li JS, Jiang SY, Wang DP, Hu CX, Wang GL, Huang DX, Jiao GH, Wei D, Ye SG, Huang JA, Zhou L, Zhang XQ, He JX.	Lung transplantation as therapeutic option in acute respiratory distress syndrome for coronavirus disease 2019-related pulmonary fibrosis	32251003				Other subject	0	0							Chen JY, Qiao K, Liu F, Wu B, Xu X, Jiao GQ, Lu RG, Li HX, Zhao J, Huang J, Yang Y, Lu XJ, Li JS, Jiang SY, Wang DP, Hu CX, Wang GL, Huang DX, Jiao GH, Wei D, Ye SG, Huang JA, Zhou L, Zhang XQ, He JX.		Chin Med J (Engl). 2020 Jun 20;133(12):1390-1396. doi: 10.1097/CM9.0000000000000839.	Chen JY	Chin Med J (Engl)	2020-04-07	PMC7339336	32251003		10.1097/CM9.0000000000000839
2020	Drolen C, Cantu E, Goldberg HJ, Diamond JM, Courtwright A.	Impact of the elimination of the donation service area on United States lung transplant practices and outcomes at high and low competition centers	32506618				Other subject	0	0			0				Drolen C, Cantu E, Goldberg HJ, Diamond JM, Courtwright A.		Am J Transplant. 2020 Jun 7. doi: 10.1111/ajt.16098. Online ahead of print.	Drolen C	Am J Transplant	2020-06-08		32506618		10.1111/ajt.16098
2020	Gorman E, Shankar-Hari M, Hopkins P, Tunnicliffe WS, Perkins GD, Silversides J, McGuigan P, Jackson C, Boyle R, McFerran J, McDowell C, Campbell C, McFarland M, Smythe J, Thompson J, Williams B, Curley G, Laffey JG, Clarke M, O'Kane C, McAuley DF.	Repair of Acute Respiratory Distress Syndrome by Stromal Cell Administration in COVID-19 (REALIST-COVID-19): A structured summary of a study protocol for a randomised, controlled trial	32493473				Other subject	0	0							Gorman E, Shankar-Hari M, Hopkins P, Tunnicliffe WS, Perkins GD, Silversides J, McGuigan P, Jackson C, Boyle R, McFerran J, McDowell C, Campbell C, McFarland M, Smythe J, Thompson J, Williams B, Curley G, Laffey JG, Clarke M, O'Kane C, McAuley DF.		Trials. 2020 Jun 3;21(1):462. doi: 10.1186/s13063-020-04416-w.	Gorman E	Trials	2020-06-05	PMC7267756	32493473		10.1186/s13063-020-04416-w
2020	Kasai T, Bunya N, Wada K, Kakizaki R, Mizuno H, Inoue H, Uemura S, Takahashi S, Narimatsu E, Takeda S; Japan ECMOnet for COVID‐19.	Veno-venous extracorporeal membrane oxygenation and prone ventilation for therapeutic management of COVID-19	32793357				Other subject	0	0							Kasai T, Bunya N, Wada K, Kakizaki R, Mizuno H, Inoue H, Uemura S, Takahashi S, Narimatsu E, Takeda S; Japan ECMOnet for COVID‐19.		Acute Med Surg. 2020 Jul 27;7(1):e546. doi: 10.1002/ams2.546. eCollection 2020 Jan-Dec.	Kasai T	Acute Med Surg	2020-08-15	PMC7419213	32793357		10.1002/ams2.546
2020	Khan T, Agnihotri K, Tripathi A, Mukherjee S, Agnihotri N, Gupta G.	COVID-19: A Worldwide, Zoonotic, Pandemic Outbreak	32412918				Other subject	0	0							Khan T, Agnihotri K, Tripathi A, Mukherjee S, Agnihotri N, Gupta G.		Altern Ther Health Med. 2020 Aug;26(S2):56-64.	Khan T	Altern Ther Health Med	2020-05-16		32412918
2020	Kim KT, Morton S, Howe S, Chiew YS, Knopp JL, Docherty P, Pretty C, Desaive T, Benyo B, Szlavecz A, Moeller K, Shaw GM, Chase JG.	Model-based PEEP titration versus standard practice in mechanical ventilation: a randomised controlled trial	32007099				Other subject	0	0							Kim KT, Morton S, Howe S, Chiew YS, Knopp JL, Docherty P, Pretty C, Desaive T, Benyo B, Szlavecz A, Moeller K, Shaw GM, Chase JG.		Trials. 2020 Feb 1;21(1):130. doi: 10.1186/s13063-019-4035-7.	Kim KT	Trials	2020-02-03	PMC6995650	32007099		10.1186/s13063-019-4035-7
2020	Ledoux A, Saint Leger P.	Therapeutic management of severe hypothermia with veno-arterial ECMO: where do we stand? Case report and review of the current literature	32316980				Other subject	0	0							Ledoux A, Saint Leger P.		Scand J Trauma Resusc Emerg Med. 2020 Apr 21;28(1):30. doi: 10.1186/s13049-020-00723-y.	Ledoux A	Scand J Trauma Resusc Emerg Med	2020-04-23	PMC7175497	32316980		10.1186/s13049-020-00723-y
2020	Lorusso R.	Education and Training in Extracorporeal Life Support: The Structured, Visionary, and Needed Mission of the Extracorporeal Life Support Organization…Not Forgetting Problem-Based Learning, Ethics, and Leadership	32058383				Other subject	0	0		0	0				Lorusso R.		Crit Care Med. 2020 Mar;48(3):435-437. doi: 10.1097/CCM.0000000000004196.	Lorusso R	Crit Care Med	2020-02-15		32058383		10.1097/CCM.0000000000004196
2020	Muguruma K, Kunisawa S, Fushimi K, Imanaka Y.	Epidemiology and volume-outcome relationship of extracorporeal membrane oxygenation for respiratory failure in Japan: A retrospective observational study using a national administrative database	32076555				Other subject	0	0							Muguruma K, Kunisawa S, Fushimi K, Imanaka Y.		Acute Med Surg. 2020 Feb 12;7(1):e486. doi: 10.1002/ams2.486. eCollection 2020 Jan-Dec.	Muguruma K	Acute Med Surg	2020-02-21	PMC7013206	32076555		10.1002/ams2.486
2020	Neal JB, Pearlman RA, White DB, Tolchin B, Sheth KN, Bernat JL, Hwang DY.	Policies for Mandatory Ethics Consultations at U.S. Academic Teaching Hospitals: A Multisite Survey Study	32317595				Other subject	0	0							Neal JB, Pearlman RA, White DB, Tolchin B, Sheth KN, Bernat JL, Hwang DY.		Crit Care Med. 2020 Jun;48(6):847-853. doi: 10.1097/CCM.0000000000004343.	Neal JB	Crit Care Med	2020-04-23		32317595		10.1097/CCM.0000000000004343
2020	Parker WF, Chung K, Anderson AS, Siegler M, Huang ES, Churpek MM.	Practice Changes at U.S. Transplant Centers After the New Adult Heart Allocation Policy	32527399				Other subject	0	0		0	0				Parker WF, Chung K, Anderson AS, Siegler M, Huang ES, Churpek MM.		J Am Coll Cardiol. 2020 Jun 16;75(23):2906-2916. doi: 10.1016/j.jacc.2020.01.066.	Parker WF	J Am Coll Cardiol	2020-06-13	PMC7304520	32527399	NIHMS1586009	10.1016/j.jacc.2020.01.066
2020	Price S, Singh S, Ledot S, Bianchi P, Hind M, Tavazzi G, Vranckx P.	Respiratory management in severe acute respiratory syndrome coronavirus 2 infection	32375488				Other subject	0	0							Price S, Singh S, Ledot S, Bianchi P, Hind M, Tavazzi G, Vranckx P.		Eur Heart J Acute Cardiovasc Care. 2020 Apr;9(3):229-238. doi: 10.1177/2048872620924613. Epub 2020 May 7.	Price S	Eur Heart J Acute Cardiovasc Care	2020-05-08	PMC7215090	32375488		10.1177/2048872620924613
2020	Scala R, Ciarleglio G, Maccari U, Granese V, Salerno L, Madioni C.	Ventilator Support and Oxygen Therapy in Palliative and End-of-Life Care in the Elderly	32163365				Other subject	0	0							Scala R, Ciarleglio G, Maccari U, Granese V, Salerno L, Madioni C.		Turk Thorac J. 2020 Jan;21(1):54-60. doi: 10.5152/TurkThoracJ.2020.201401. Epub 2020 Jan 1.	Scala R	Turk Thorac J	2020-03-13	PMC7020899	32163365		10.5152/TurkThoracJ.2020.201401
2020	Zheng Y, Sun LJ, Xu M, Pan J, Zhang YT, Fang XL, Fang Q, Cai HL.	Clinical characteristics of 34 COVID-19 patients admitted to intensive care unit in Hangzhou, China	32425003				Other subject	0	0							Zheng Y, Sun LJ, Xu M, Pan J, Zhang YT, Fang XL, Fang Q, Cai HL.		J Zhejiang Univ Sci B. 2020 May;21(5):378-387. doi: 10.1631/jzus.B2000174.	Zheng Y	J Zhejiang Univ Sci B	2020-05-20	PMC7238397	32425003		10.1631/jzus.B2000174
1991	Royall RM, Bartlett RH, Cornell RG, Byar DP, Dupont WD, Levine RJ, Lindley F, Simes RJ, Zelen M.	Ethics and statistics in randomized clinical trials	11653993				Other subject			0						Royall RM, Bartlett RH, Cornell RG, Byar DP, Dupont WD, Levine RJ, Lindley F, Simes RJ, Zelen M.		Stat Sci. 1991;6(1):52-88. doi: 10.1214/ss/1177011934.	Royall RM	Stat Sci	1991-01-01		11653993		10.1214/ss/1177011934
1992	Truog RD.	Triage in the ICU	1612881				Other subject			0						Truog RD.		Hastings Cent Rep. 1992 May-Jun;22(3):13-7.	Truog RD	Hastings Cent Rep	1992-05-01		1612881
1996	Banner W Jr.	Risks of extracorporeal membrane oxygenation: is there a role for use in the management of the acutely poisoned patient?	8699549				Other subject			0						Banner W Jr.		J Toxicol Clin Toxicol. 1996;34(4):365-71. doi: 10.3109/15563659609013805.	Banner W Jr	J Toxicol Clin Toxicol	1996-01-01		8699549		10.3109/15563659609013805
1997	Cooper PA.	Ethics of HIV trials	9388416				Other subject			0						Cooper PA.		Lancet. 1997 Nov 22;350(9090):1547. doi: 10.1016/s0140-6736(05)63971-2.	Cooper PA	Lancet	1997-12-06		9388416		10.1016/s0140-6736(05)63971-2
1997	Snowdon C, Garcia J, Elbourne D.	Making sense of randomization; responses of parents of critically ill babies to random allocation of treatment in a clinical trial	9351153				Other subject			0						Snowdon C, Garcia J, Elbourne D.		Soc Sci Med. 1997 Nov;45(9):1337-55. doi: 10.1016/s0277-9536(97)00063-4.	Snowdon C	Soc Sci Med	1997-11-14		9351153		10.1016/s0277-9536(97)00063-4
1999	Braunholtz DA.	A note on Zelen randomization: attitudes of parents participating in a neonatal clinical trial	10588298				Other subject			0						Braunholtz DA.		Control Clin Trials. 1999 Dec;20(6):569-72. doi: 10.1016/s0197-2456(99)00036-7.	Braunholtz DA	Control Clin Trials	1999-12-10		10588298		10.1016/s0197-2456(99)00036-7
1999	Rosenberger WF.	Randomized play-the-winner clinical trials: review and recommendations	10440560				Other subject			0						Rosenberger WF.		Control Clin Trials. 1999 Aug;20(4):328-42. doi: 10.1016/s0197-2456(99)00013-6.	Rosenberger WF	Control Clin Trials	1999-08-10		10440560		10.1016/s0197-2456(99)00013-6
2000	Manning DJ.	Presumed consent in emergency neonatal research	10951919				Other subject			0						Manning DJ.		J Med Ethics. 2000 Aug;26(4):249-53. doi: 10.1136/jme.26.4.249.	Manning DJ	J Med Ethics	2000-08-22	PMC1733262	10951919		10.1136/jme.26.4.249
2002	Ramakrishnan N.	Eighth World Congress of Intensive and Critical Care Medicine, 28 October-1 November 2001, Sydney, Australia: Harm minimization and effective risk management	11940273				Other subject			0						Ramakrishnan N.		Crit Care. 2002 Feb;6(1):89-91. doi: 10.1186/cc1460. Epub 2001 Nov 28.	Ramakrishnan N	Crit Care	2002-04-10	PMC137401	11940273		10.1186/cc1460
2008	Büsing KA, Kilian AK, Schaible T, Dinter DJ, Neff KW.	MR lung volume in fetal congenital diaphragmatic hernia: logistic regression analysis--mortality and extracorporeal membrane oxygenation	18566175				Other subject			0						Büsing KA, Kilian AK, Schaible T, Dinter DJ, Neff KW.		Radiology. 2008 Jul;248(1):233-9. doi: 10.1148/radiol.2481070934.	Büsing KA	Radiology	2008-06-21		18566175		10.1148/radiol.2481070934
2008	Büsing KA, Kilian AK, Schaible T, Endler C, Schaffelder R, Neff KW.	MR relative fetal lung volume in congenital diaphragmatic hernia: survival and need for extracorporeal membrane oxygenation	18566176				Other subject			0						Büsing KA, Kilian AK, Schaible T, Endler C, Schaffelder R, Neff KW.		Radiology. 2008 Jul;248(1):240-6. doi: 10.1148/radiol.2481070952.	Büsing KA	Radiology	2008-06-21		18566176		10.1148/radiol.2481070952
2008	Hastings SL, Pellegrino VA, Preovolos A, Salamonsen RF.	Survey of adult extracorporeal membrane oxygenation (ECMO) practice and attitudes among Australian and New Zealand intensivists	18304017				Other subject			0						Hastings SL, Pellegrino VA, Preovolos A, Salamonsen RF.		Crit Care Resusc. 2008 Mar;10(1):46.	Hastings SL	Crit Care Resusc	2008-02-29		18304017
2010	McHoney M, Giacomello L, Nah SA, De Coppi P, Kiely EM, Curry JI, Drake DP, Eaton S, Pierro A.	Thoracoscopic repair of congenital diaphragmatic hernia: intraoperative ventilation and recurrence	20152351				Other subject			0						McHoney M, Giacomello L, Nah SA, De Coppi P, Kiely EM, Curry JI, Drake DP, Eaton S, Pierro A.		J Pediatr Surg. 2010 Feb;45(2):355-9. doi: 10.1016/j.jpedsurg.2009.10.072.	McHoney M	J Pediatr Surg	2010-02-16		20152351		10.1016/j.jpedsurg.2009.10.072
2012	Belohlavek J, Kucera K, Jarkovsky J, Franek O, Pokorna M, Danda J, Skripsky R, Kandrnal V, Balik M, Kunstyr J, Horak J, Smid O, Valasek J, Mrazek V, Schwarz Z, Linhart A.	Hyperinvasive approach to out-of hospital cardiac arrest using mechanical chest compression device, prehospital intraarrest cooling, extracorporeal life support and early invasive assessment compared to standard of care. A randomized parallel groups comparative study proposal. "Prague OHCA study"	22883307				Other subject			0						Belohlavek J, Kucera K, Jarkovsky J, Franek O, Pokorna M, Danda J, Skripsky R, Kandrnal V, Balik M, Kunstyr J, Horak J, Smid O, Valasek J, Mrazek V, Schwarz Z, Linhart A.		J Transl Med. 2012 Aug 10;10:163. doi: 10.1186/1479-5876-10-163.	Belohlavek J	J Transl Med	2012-08-14	PMC3492121	22883307		10.1186/1479-5876-10-163
2012	Lantos JD.	Ethics for the pediatrician: the evolving ethics of cochlear implants in children	22753791				Other subject			0						Lantos JD.		Pediatr Rev. 2012 Jul;33(7):323-6. doi: 10.1542/pir.33-7-323.	Lantos JD	Pediatr Rev	2012-07-04		22753791		10.1542/pir.33-7-323
2012	Valenza F, Rosso L, Gatti S, Coppola S, Froio S, Colombo J, Dossi R, Pizzocri M, Salice V, Nosotti M, Reggiani P, Tosi D, Palleschi A, Pappalettera M, Ferrero S, Perazzoli A, Costantini D, Scalamogna M, Rossi G, Colombo C, Santambrogio L, Gattinoni L.	Extracorporeal lung perfusion and ventilation to improve donor lung function and increase the number of organs available for transplantation	22974847				Other subject			0						Valenza F, Rosso L, Gatti S, Coppola S, Froio S, Colombo J, Dossi R, Pizzocri M, Salice V, Nosotti M, Reggiani P, Tosi D, Palleschi A, Pappalettera M, Ferrero S, Perazzoli A, Costantini D, Scalamogna M, Rossi G, Colombo C, Santambrogio L, Gattinoni L.		Transplant Proc. 2012 Sep;44(7):1826-9. doi: 10.1016/j.transproceed.2012.06.023.	Valenza F	Transplant Proc	2012-09-15		22974847		10.1016/j.transproceed.2012.06.023
2013	de Lange DW, Sikma MA, Meulenbelt J.	Extracorporeal membrane oxygenation in the treatment of poisoned patients	23697460				Other subject			0						de Lange DW, Sikma MA, Meulenbelt J.		Clin Toxicol (Phila). 2013 Jun;51(5):385-93. doi: 10.3109/15563650.2013.800876. Epub 2013 May 23.	de Lange DW	Clin Toxicol (Phila)	2013-05-24		23697460		10.3109/15563650.2013.800876
2013	Doorenbos AZ, Starks H, Bourget E, McMullan DM, Lewis-Newby M, Rue TC, Lindhorst T, Aisenberg E, Oman N, Curtis JR, Hays R; Seattle Ethics in ECLS (SEE) Consortium, Clark JD, Baden HP, Brogan TV, Di Gennaro JL, Mazor R, Roberts JS, Turnbull J, Wilfond BS.	Examining palliative care team involvement in automatic consultations for children on extracorporeal life support in the pediatric intensive care unit	23540309				Other subject			0						Doorenbos AZ, Starks H, Bourget E, McMullan DM, Lewis-Newby M, Rue TC, Lindhorst T, Aisenberg E, Oman N, Curtis JR, Hays R; Seattle Ethics in ECLS (SEE) Consortium, Clark JD, Baden HP, Brogan TV, Di Gennaro JL, Mazor R, Roberts JS, Turnbull J, Wilfond BS.		J Palliat Med. 2013 May;16(5):492-5. doi: 10.1089/jpm.2012.0536. Epub 2013 Mar 29.	Doorenbos AZ	J Palliat Med	2013-04-02	PMC3705963	23540309		10.1089/jpm.2012.0536
2013	Gomberg-Maitland M, Bull TM, Saggar R, Barst RJ, Elgazayerly A, Fleming TR, Grimminger F, Rainisio M, Stewart DJ, Stockbridge N, Ventura C, Ghofrani AH, Rubin LJ.	New trial designs and potential therapies for pulmonary artery hypertension	24355645				Other subject			0						Gomberg-Maitland M, Bull TM, Saggar R, Barst RJ, Elgazayerly A, Fleming TR, Grimminger F, Rainisio M, Stewart DJ, Stockbridge N, Ventura C, Ghofrani AH, Rubin LJ.		J Am Coll Cardiol. 2013 Dec 24;62(25 Suppl):D82-91. doi: 10.1016/j.jacc.2013.10.026.	Gomberg-Maitland M	J Am Coll Cardiol	2013-12-21	PMC4117578	24355645	NIHMS611039	10.1016/j.jacc.2013.10.026
2014	Borisenko O, Wylie G, Payne J, Bjessmo S, Smith J, Firmin R, Yonan N.	The cost impact of short-term ventricular assist devices and extracorporeal life support systems therapies on the National Health Service in the UK	24667583				Other subject			0						Borisenko O, Wylie G, Payne J, Bjessmo S, Smith J, Firmin R, Yonan N.		Interact Cardiovasc Thorac Surg. 2014 Jul;19(1):41-8. doi: 10.1093/icvts/ivu078. Epub 2014 Mar 25.	Borisenko O	Interact Cardiovasc Thorac Surg	2014-03-27		24667583		10.1093/icvts/ivu078
2014	Borisenko O, Wylie G, Payne J, Bjessmo S, Smith J, Yonan N, Firmin R.	Thoratec CentriMag for temporary treatment of refractory cardiogenic shock or severe cardiopulmonary insufficiency: a systematic literature review and meta-analysis of observational studies	25010916				Other subject			0						Borisenko O, Wylie G, Payne J, Bjessmo S, Smith J, Yonan N, Firmin R.		ASAIO J. 2014 Sep-Oct;60(5):487-97. doi: 10.1097/MAT.0000000000000117.	Borisenko O	ASAIO J	2014-07-11	PMC4154791	25010916		10.1097/MAT.0000000000000117
2014	Chen YY, Chen L, Huang TS, Ko WJ, Chu TS, Ni YH, Chang SC.	Significant social events and increasing use of life-sustaining treatment: trend analysis using extracorporeal membrane oxygenation as an example	24592981				Other subject			0						Chen YY, Chen L, Huang TS, Ko WJ, Chu TS, Ni YH, Chang SC.		BMC Med Ethics. 2014 Mar 4;15:21. doi: 10.1186/1472-6939-15-21.	Chen YY	BMC Med Ethics	2014-03-06	PMC3975881	24592981		10.1186/1472-6939-15-21
2014	Friedland-Little JM, Gajarski RJ, Yu S, Donohue JE, Zamberlan MC, Schumacher KR.	Outcomes of third heart transplants in pediatric and young adult patients: analysis of the United Network for Organ Sharing database	24861821				Other subject			0						Friedland-Little JM, Gajarski RJ, Yu S, Donohue JE, Zamberlan MC, Schumacher KR.		J Heart Lung Transplant. 2014 Sep;33(9):917-23. doi: 10.1016/j.healun.2014.04.009. Epub 2014 Apr 19.	Friedland-Little JM	J Heart Lung Transplant	2014-05-28		24861821		10.1016/j.healun.2014.04.009
2014	West TE, von Saint André-von Arnim A.	Clinical presentation and management of severe Ebola virus disease	25369317				Other subject			0						West TE, von Saint André-von Arnim A.		Ann Am Thorac Soc. 2014 Nov;11(9):1341-50. doi: 10.1513/AnnalsATS.201410-481PS.	West TE	Ann Am Thorac Soc	2014-11-05		25369317		10.1513/AnnalsATS.201410-481PS
2014	Wolbrink TA, Kissoon N, Burns JP.	The development of an internet-based knowledge exchange platform for pediatric critical care clinicians worldwide*	24395000				Other subject			0						Wolbrink TA, Kissoon N, Burns JP.		Pediatr Crit Care Med. 2014 Mar;15(3):197-205. doi: 10.1097/PCC.0000000000000051.	Wolbrink TA	Pediatr Crit Care Med	2014-01-08		24395000		10.1097/PCC.0000000000000051
2015	Setta SM, Shemie SD.	An explanation and analysis of how world religions formulate their ethical decisions on withdrawing treatment and determining death	25890378				Other subject			0						Setta SM, Shemie SD.		Philos Ethics Humanit Med. 2015 Mar 11;10:6. doi: 10.1186/s13010-015-0025-x.	Setta SM	Philos Ethics Humanit Med	2015-04-19	PMC4396881	25890378		10.1186/s13010-015-0025-x
2016	Biswas A, Bhattacharya R.	Near efficient target allocations in response-adaptive randomization	23242383				Other subject			0						Biswas A, Bhattacharya R.		Stat Methods Med Res. 2016 Apr;25(2):807-20. doi: 10.1177/0962280212468378. Epub 2012 Dec 12.	Biswas A	Stat Methods Med Res	2012-12-18		23242383		10.1177/0962280212468378
2017	Carter MA.	Ethical Considerations for Care of the Child Undergoing Extracorporeal Membrane Oxygenation	28159074				Other subject			0						Carter MA.		AORN J. 2017 Feb;105(2):148-158. doi: 10.1016/j.aorn.2016.12.001.	Carter MA	AORN J	2017-02-05		28159074		10.1016/j.aorn.2016.12.001
2017	Goel AN, Iyengar A, Schowengerdt K, Fiore AC, Huddleston CB.	Heart transplantation in children with intellectual disability: An analysis of the UNOS database	27933693				Other subject			0						Goel AN, Iyengar A, Schowengerdt K, Fiore AC, Huddleston CB.		Pediatr Transplant. 2017 Mar;21(2). doi: 10.1111/petr.12858. Epub 2016 Dec 9.	Goel AN	Pediatr Transplant	2016-12-10		27933693		10.1111/petr.12858
2017	Harnisch LO, Moerer O.	Sequential use of extracorporeal devices to avoid mechanical ventilation in a patient with complicated pulmonary fibrosis	28864998				Other subject			0						Harnisch LO, Moerer O.		J Artif Organs. 2017 Dec;20(4):365-370. doi: 10.1007/s10047-017-0983-4. Epub 2017 Sep 1.	Harnisch LO	J Artif Organs	2017-09-03		28864998		10.1007/s10047-017-0983-4
2017	Krueger K, Schmutz A, Zieger B, Kalbhenn J.	Venovenous Extracorporeal Membrane Oxygenation With Prophylactic Subcutaneous Anticoagulation Only: An Observational Study in More Than 60 Patients	27256966				Other subject			0						Krueger K, Schmutz A, Zieger B, Kalbhenn J.		Artif Organs. 2017 Feb;41(2):186-192. doi: 10.1111/aor.12737. Epub 2016 Jun 3.	Krueger K	Artif Organs	2016-06-04		27256966		10.1111/aor.12737
2017	Laage T, Loewy JW, Menon S, Miller ER, Pulkstenis E, Kan-Dobrosky N, Coffey C.	Ethical Considerations in Adaptive Design Clinical Trials	30231727				Other subject			0						Laage T, Loewy JW, Menon S, Miller ER, Pulkstenis E, Kan-Dobrosky N, Coffey C.		Ther Innov Regul Sci. 2017 Mar;51(2):190-199. doi: 10.1177/2168479016667766. Epub 2016 Sep 27.	Laage T	Ther Innov Regul Sci	2018-09-21		30231727		10.1177/2168479016667766
2017	Perez-Villares JM, Rubio JJ, Del Río F, Miñambres E.	Validation of a new proposal to avoid donor resuscitation in controlled donation after circulatory death with normothermic regional perfusion	28591558				Other subject			0						Perez-Villares JM, Rubio JJ, Del Río F, Miñambres E.		Resuscitation. 2017 Aug;117:46-49. doi: 10.1016/j.resuscitation.2017.05.030. Epub 2017 Jun 4.	Perez-Villares JM	Resuscitation	2017-06-08		28591558		10.1016/j.resuscitation.2017.05.030
2018	Allen LA, Khazanie P.	Behind the Scenes in "The Real World" of Heart Transplantation: Will You Accept This Rose?	29666021				Other subject			0						Allen LA, Khazanie P.		J Am Coll Cardiol. 2018 Apr 24;71(16):1726-1728. doi: 10.1016/j.jacc.2018.02.031.	Allen LA	J Am Coll Cardiol	2018-04-19		29666021		10.1016/j.jacc.2018.02.031
2018	Banjas N, Hopf HB, Hanisch E, Friedrichson B, Fichte J, Buia A.	ECMO-treatment in patients with acute lung failure, cardiogenic, and septic shock: mortality and ECMO-learning curve over a 6-year period	30598825				Other subject			0						Banjas N, Hopf HB, Hanisch E, Friedrichson B, Fichte J, Buia A.		J Intensive Care. 2018 Dec 18;6:84. doi: 10.1186/s40560-018-0352-2. eCollection 2018.	Banjas N	J Intensive Care	2019-01-02	PMC6299557	30598825		10.1186/s40560-018-0352-2
2018	Catto JWF, Khetrapal P, Ambler G, Sarpong R, Khan MS, Tan M, Feber A, Dixon S, Goodwin L, Williams NR, McGrath J, Rowe E, Koupparis A, Brew-Graves C, Kelly JD.	Robot-assisted radical cystectomy with intracorporeal urinary diversion versus open radical cystectomy (iROC): protocol for a randomised controlled trial with internal feasibility study	30093510				Other subject			0						Catto JWF, Khetrapal P, Ambler G, Sarpong R, Khan MS, Tan M, Feber A, Dixon S, Goodwin L, Williams NR, McGrath J, Rowe E, Koupparis A, Brew-Graves C, Kelly JD.		BMJ Open. 2018 Aug 8;8(8):e020500. doi: 10.1136/bmjopen-2017-020500.	Catto JWF	BMJ Open	2018-08-11	PMC6089318	30093510		10.1136/bmjopen-2017-020500
2018	Gottlieb J, Greer M.	Recent advances in extracorporeal life support as a bridge to lung transplantation	29369703				Other subject			0						Gottlieb J, Greer M.		Expert Rev Respir Med. 2018 Mar;12(3):217-225. doi: 10.1080/17476348.2018.1433035. Epub 2018 Jan 30.	Gottlieb J	Expert Rev Respir Med	2018-01-26		29369703		10.1080/17476348.2018.1433035
2018	Kuraim GA, Garros D, Ryerson L, Moradi F, Dinu IA, Garcia Guerra G, Moddemann D, Bond GY, Robertson CMT, Joffe AR; Western Canadian Complex Pediatric Therapies Follow-up Program.	Predictors and outcomes of early post-operative veno-arterial extracorporeal membrane oxygenation following infant cardiac surgery	30202528				Other subject			0						Kuraim GA, Garros D, Ryerson L, Moradi F, Dinu IA, Garcia Guerra G, Moddemann D, Bond GY, Robertson CMT, Joffe AR; Western Canadian Complex Pediatric Therapies Follow-up Program.		J Intensive Care. 2018 Sep 3;6:56. doi: 10.1186/s40560-018-0326-4. eCollection 2018.	Kuraim GA	J Intensive Care	2018-09-12	PMC6122608	30202528		10.1186/s40560-018-0326-4
2018	Liu K, Ogura T, Takahashi K, Nakamura M, Ohtake H, Fujiduka K, Abe E, Oosaki H, Miyazaki D, Suzuki H, Nishikimi M, Lefor AK, Mato T.	The safety of a novel early mobilization protocol conducted by ICU physicians: a prospective observational study	29484188				Other subject			0						Liu K, Ogura T, Takahashi K, Nakamura M, Ohtake H, Fujiduka K, Abe E, Oosaki H, Miyazaki D, Suzuki H, Nishikimi M, Lefor AK, Mato T.		J Intensive Care. 2018 Feb 20;6:10. doi: 10.1186/s40560-018-0281-0. eCollection 2018.	Liu K	J Intensive Care	2018-02-28	PMC5819168	29484188		10.1186/s40560-018-0281-0
2018	Ohshimo S, Shime N, Nakagawa S, Nishida O, Takeda S; Committee of the Japan ECMO project.	Comparison of extracorporeal membrane oxygenation outcome for influenza-associated acute respiratory failure in Japan between 2009 and 2016	30009033				Other subject			0						Ohshimo S, Shime N, Nakagawa S, Nishida O, Takeda S; Committee of the Japan ECMO project.		J Intensive Care. 2018 Jul 11;6:38. doi: 10.1186/s40560-018-0306-8. eCollection 2018.	Ohshimo S	J Intensive Care	2018-07-17	PMC6042359	30009033		10.1186/s40560-018-0306-8
2018	Prohaska S, Schirner A, Bashota A, Körner A, Blumenstock G, Haeberle HA.	Intravenous immunoglobulin fails to improve ARDS in patients undergoing ECMO therapy	29497534				Other subject			0						Prohaska S, Schirner A, Bashota A, Körner A, Blumenstock G, Haeberle HA.		J Intensive Care. 2018 Feb 26;6:11. doi: 10.1186/s40560-018-0278-8. eCollection 2018.	Prohaska S	J Intensive Care	2018-03-03	PMC5827994	29497534		10.1186/s40560-018-0278-8
2018	Yi SG, Lunsford KE, Bruce C, Ghobrial RM.	Conquering combined thoracic organ and liver transplantation: indications and outcomes for heart-liver and lung-liver transplantation	29389820				Other subject			0						Yi SG, Lunsford KE, Bruce C, Ghobrial RM.		Curr Opin Organ Transplant. 2018 Apr;23(2):180-186. doi: 10.1097/MOT.0000000000000509.	Yi SG	Curr Opin Organ Transplant	2018-02-02		29389820		10.1097/MOT.0000000000000509
2019	Corley A, Lye I, Lavana JD, Ahuja A, Anstey CM, Jarrett P, Haisz E, Parke R, Pellegrino V, Buscher H, Fraser JF; ECMO PP Study Investigators.	Nosocomial infection prevalence in patients undergoing extracorporeal membrane oxygenation (ECMO): protocol for a point prevalence study across Australia and New Zealand	31296512				Other subject			0						Corley A, Lye I, Lavana JD, Ahuja A, Anstey CM, Jarrett P, Haisz E, Parke R, Pellegrino V, Buscher H, Fraser JF; ECMO PP Study Investigators.		BMJ Open. 2019 Jul 10;9(7):e029293. doi: 10.1136/bmjopen-2019-029293.	Corley A	BMJ Open	2019-07-13	PMC6624104	31296512		10.1136/bmjopen-2019-029293
2019	Dalia AA, Ortoleva J, Fiedler A, Villavicencio M, Shelton K, Cudemus GD.	Extracorporeal Membrane Oxygenation Is a Team Sport: Institutional Survival Benefits of a Formalized ECMO Team	30072265				Other subject			0						Dalia AA, Ortoleva J, Fiedler A, Villavicencio M, Shelton K, Cudemus GD.		J Cardiothorac Vasc Anesth. 2019 Apr;33(4):902-907. doi: 10.1053/j.jvca.2018.06.003. Epub 2018 Jun 20.	Dalia AA	J Cardiothorac Vasc Anesth	2018-08-04		30072265		10.1053/j.jvca.2018.06.003
2019	Komindr A, Abe R, Tateishi Y, Takahashi Y, Goto J, Wada K, Furukawa Y, Sugiura A, Imaeda T, Suga N, Hattori N, Oda S.	Establishing extracorporeal membrane oxygenation team increased number of patients and improved data recording	30774958				Other subject			0						Komindr A, Abe R, Tateishi Y, Takahashi Y, Goto J, Wada K, Furukawa Y, Sugiura A, Imaeda T, Suga N, Hattori N, Oda S.		J Intensive Care. 2019 Feb 7;7:11. doi: 10.1186/s40560-019-0366-4. eCollection 2019.	Komindr A	J Intensive Care	2019-02-19	PMC6367753	30774958		10.1186/s40560-019-0366-4
2012	Shetty AK, Ross GA, Pranikoff T, Gubareva LV, Sechrist C, Guirand DM, Abramson J, Lin JJ.	Oseltamivir-resistant 2009 H1N1 influenza pneumonia during therapy in a renal transplant recipient	22764830				Other subject	0	0							Shetty AK, Ross GA, Pranikoff T, Gubareva LV, Sechrist C, Guirand DM, Abramson J, Lin JJ.		Pediatr Transplant. 2012 Aug;16(5):E153-7. doi: 10.1111/j.1399-3046.2011.01489.x. Epub 2011 Mar 9.	Shetty AK	Pediatr Transplant	2012-07-07		22764830		10.1111/j.1399-3046.2011.01489.x
2013	Hetzer R, Weng Y, Delmo Walter EM.	State of the art in paediatric heart transplantation: the Berlin experience	23184909				Other subject	0	0							Hetzer R, Weng Y, Delmo Walter EM.		Eur J Cardiothorac Surg. 2013 Feb;43(2):258-67. doi: 10.1093/ejcts/ezs588. Epub 2012 Nov 25.	Hetzer R	Eur J Cardiothorac Surg	2012-11-28		23184909		10.1093/ejcts/ezs588
2017	Napp LC, Kühn C, Bauersachs J.	ECMO in cardiac arrest and cardiogenic shock	28127638				Other subject	0	0							Napp LC, Kühn C, Bauersachs J.		Herz. 2017 Feb;42(1):27-44. doi: 10.1007/s00059-016-4523-4.	Napp LC	Herz	2017-01-28	PMC5306351	28127638		10.1007/s00059-016-4523-4
2018	Grubmüller M, Kerschbaum M, Diepold E, Angerpointner K, Nerlich M, Ernstberger A.	Severe thoracic trauma - still an independent predictor for death in multiple injured patients?	29310701				Other subject	0	0							Grubmüller M, Kerschbaum M, Diepold E, Angerpointner K, Nerlich M, Ernstberger A.		Scand J Trauma Resusc Emerg Med. 2018 Jan 8;26(1):6. doi: 10.1186/s13049-017-0469-7.	Grubmüller M	Scand J Trauma Resusc Emerg Med	2018-01-10	PMC5759165	29310701		10.1186/s13049-017-0469-7
2018	Mizuguchi Y, Taniguchi N, Takahashi A.	Successful treatment of out-of-hospital cardiopulmonary arrest due to streptococcal toxic shock syndrome - effectiveness of extracorporeal membrane oxygenation and the rapid antigen group A streptococcus test: a case report	30170621				Other subject	0	0							Mizuguchi Y, Taniguchi N, Takahashi A.		J Med Case Rep. 2018 Sep 1;12(1):244. doi: 10.1186/s13256-018-1780-2.	Mizuguchi Y	J Med Case Rep	2018-09-02	PMC6119299	30170621		10.1186/s13256-018-1780-2
2018	Na SJ, Choi HJ, Chung CR, Cho YH, Jang HR, Suh GY, Jeon K.	Using additional pressure control lines when connecting a continuous renal replacement therapy device to an extracorporeal membrane oxygenation circuit	30567509				Other subject	0	0							Na SJ, Choi HJ, Chung CR, Cho YH, Jang HR, Suh GY, Jeon K.		BMC Nephrol. 2018 Dec 19;19(1):369. doi: 10.1186/s12882-018-1172-2.	Na SJ	BMC Nephrol	2018-12-21	PMC6299989	30567509		10.1186/s12882-018-1172-2
2018	Winiszewski H, Rougny AC, Lagoutte-Renosi J, Millon L, Capellier G, Navellou JC, Piton G, Clairet AL.	The pharmacokinetic challenge of treating invasive aspergillosis complicating severe influenzae assisted by extracorporeal membrane oxygenation	30577863				Other subject	0	0							Winiszewski H, Rougny AC, Lagoutte-Renosi J, Millon L, Capellier G, Navellou JC, Piton G, Clairet AL.		Crit Care. 2018 Dec 22;22(1):355. doi: 10.1186/s13054-018-2285-5.	Winiszewski H	Crit Care	2018-12-23	PMC6303967	30577863		10.1186/s13054-018-2285-5
2019	Eckman PM, Katz JN, El Banayosy A, Bohula EA, Sun B, van Diepen S.	Veno-Arterial Extracorporeal Membrane Oxygenation for Cardiogenic Shock: An Introduction for the Busy Clinician	31815538				Other subject	0	0							Eckman PM, Katz JN, El Banayosy A, Bohula EA, Sun B, van Diepen S.		Circulation. 2019 Dec 10;140(24):2019-2037. doi: 10.1161/CIRCULATIONAHA.119.034512. Epub 2019 Dec 9.	Eckman PM	Circulation	2019-12-10		31815538		10.1161/CIRCULATIONAHA.119.034512
2019	Ehrentraut SF, Schroll B, Lenkeit S, Ehrentraut H, Bode C, Kreyer S, Kögl F, Lehmann F, Muders T, Scholz M, Strater C, Steinhagen F, Theuerkauf NU, Weißbrich C, Putensen C, Schewe JC.	Interprofessional two-man team approach for interhospital transport of ARDS-patients under extracorporeal membrane oxygenation: a 10 years retrospective observational cohort study	30704395				Other subject	0	0							Ehrentraut SF, Schroll B, Lenkeit S, Ehrentraut H, Bode C, Kreyer S, Kögl F, Lehmann F, Muders T, Scholz M, Strater C, Steinhagen F, Theuerkauf NU, Weißbrich C, Putensen C, Schewe JC.		BMC Anesthesiol. 2019 Jan 31;19(1):19. doi: 10.1186/s12871-019-0687-9.	Ehrentraut SF	BMC Anesthesiol	2019-02-02	PMC6357391	30704395		10.1186/s12871-019-0687-9
2019	Fukuda A, Isoda T, Sakamoto N, Nakajima K, Ohta T.	Lessons from a patient with cardiac arrest due to massive pulmonary embolism as the initial presentation of Wilms tumor: a case report and literature review	30704433				Other subject	0	0							Fukuda A, Isoda T, Sakamoto N, Nakajima K, Ohta T.		BMC Pediatr. 2019 Jan 31;19(1):39. doi: 10.1186/s12887-019-1413-y.	Fukuda A	BMC Pediatr	2019-02-02	PMC6354414	30704433		10.1186/s12887-019-1413-y
2019	Gokalp O, Donmez K, Iner H, Gokalp G, Besir Y, Yesilkaya NK, Yilik L, Gurbuz A.	Should ECMO be used in cardiogenic shock?	31097015				Other subject	0	0							Gokalp O, Donmez K, Iner H, Gokalp G, Besir Y, Yesilkaya NK, Yilik L, Gurbuz A.		Crit Care. 2019 May 16;23(1):174. doi: 10.1186/s13054-019-2453-2.	Gokalp O	Crit Care	2019-05-18	PMC6521371	31097015		10.1186/s13054-019-2453-2
2019	Granholm A, Perner A, Jensen AKG, Møller MH.	Important methodological flaws in the recently published clinical prediction model the REMEMBER score	30845996				Other subject	0	0							Granholm A, Perner A, Jensen AKG, Møller MH.		Crit Care. 2019 Mar 7;23(1):71. doi: 10.1186/s13054-019-2363-3.	Granholm A	Crit Care	2019-03-09	PMC6407253	30845996		10.1186/s13054-019-2363-3
2019	Guglin M, Zucker MJ, Bazan VM, Bozkurt B, El Banayosy A, Estep JD, Gurley J, Nelson K, Malyala R, Panjrath GS, Zwischenberger JB, Pinney SP.	Venoarterial ECMO for Adults: JACC Scientific Expert Panel	30765037				Other subject	0	0							Guglin M, Zucker MJ, Bazan VM, Bozkurt B, El Banayosy A, Estep JD, Gurley J, Nelson K, Malyala R, Panjrath GS, Zwischenberger JB, Pinney SP.		J Am Coll Cardiol. 2019 Feb 19;73(6):698-716. doi: 10.1016/j.jacc.2018.11.038.	Guglin M	J Am Coll Cardiol	2019-02-16		30765037		10.1016/j.jacc.2018.11.038
2019	Hermon M, Dotzler S, Brandt JB, Strohmaier W, Golej J.	Extended use of the modified Berlin Definition based on age-related subgroup analysis in pediatric ARDS	30232661				Other subject	0	0							Hermon M, Dotzler S, Brandt JB, Strohmaier W, Golej J.		Wien Med Wochenschr. 2019 Mar;169(3-4):93-98. doi: 10.1007/s10354-018-0659-6. Epub 2018 Sep 19.	Hermon M	Wien Med Wochenschr	2018-09-21	PMC6394569	30232661		10.1007/s10354-018-0659-6
2019	Jacquot A, Lepage X, Merckle L, Girerd N, Levy B.	Protocol for a multicentre randomised controlled trial evaluating the effects of moderate hypothermia versus normothermia on mortality in patients with refractory cardiogenic shock rescued by venoarterial extracorporeal membrane oxygenation (VA-ECMO) (HYPO-ECMO study)	31615800				Other subject	0	0							Jacquot A, Lepage X, Merckle L, Girerd N, Levy B.		BMJ Open. 2019 Oct 14;9(10):e031697. doi: 10.1136/bmjopen-2019-031697.	Jacquot A	BMJ Open	2019-10-17	PMC6797322	31615800		10.1136/bmjopen-2019-031697
2019	Karagiannidis C, Hesselmann F, Fan E.	Physiological and Technical Considerations of Extracorporeal CO(2) Removal	30849995				Other subject	0	0							Karagiannidis C, Hesselmann F, Fan E.		Crit Care. 2019 Mar 9;23(1):75. doi: 10.1186/s13054-019-2367-z.	Karagiannidis C	Crit Care	2019-03-10	PMC6408850	30849995		10.1186/s13054-019-2367-z
2019	Kordzaia D, Khodeli N, Chkhaidze Z, Inauri N, Tsomaia K, Gogiashvili L.	MORPHOLOGICAL CHANGES IN THE LIVER AFTER 8 HOURS OF PRESERVATION BY MACHINE PERFUSION	31804215				Other subject	0	0							Kordzaia D, Khodeli N, Chkhaidze Z, Inauri N, Tsomaia K, Gogiashvili L.		Georgian Med News. 2019 Oct;(295):132-137.	Kordzaia D	Georgian Med News	2019-12-06		31804215
2019	Leung KKY, Rosa Duque JS, Yu KM, Cheong KN, Chong PC, Ho MH, Chow PC.	Myocardial oedema in an 8-year-old Chinese boy with Idiopathic systemic capillary leak syndrome	30665393				Other subject	0	0							Leung KKY, Rosa Duque JS, Yu KM, Cheong KN, Chong PC, Ho MH, Chow PC.		BMC Pediatr. 2019 Jan 21;19(1):28. doi: 10.1186/s12887-019-1401-2.	Leung KKY	BMC Pediatr	2019-01-23	PMC6340176	30665393		10.1186/s12887-019-1401-2
2019	Lin MS, Tseng YH, Chen MY, Chung CM, Tsai MH, Wang PC, Chang JJ, Chen TH, Lin YS.	In-hospital and post-discharge outcomes of pediatric acute myocarditis underwent after high-dose steroid or intravenous immunoglobulin therapy	30626332				Other subject	0	0							Lin MS, Tseng YH, Chen MY, Chung CM, Tsai MH, Wang PC, Chang JJ, Chen TH, Lin YS.		BMC Cardiovasc Disord. 2019 Jan 9;19(1):10. doi: 10.1186/s12872-018-0981-3.	Lin MS	BMC Cardiovasc Disord	2019-01-11	PMC6325679	30626332		10.1186/s12872-018-0981-3
2019	Makhoul M, Bitton-Worms K, Adler Z, Saeed A, Cohen O, Bolotin G.	Extracorporeal Membrane Oxygenation (ECMO)-A Lifesaving Technology. Review and Single-center Experience	30817267				Other subject	0	0							Makhoul M, Bitton-Worms K, Adler Z, Saeed A, Cohen O, Bolotin G.		Rambam Maimonides Med J. 2019 Apr 18;10(2):e0013. doi: 10.5041/RMMJ.10363.	Makhoul M	Rambam Maimonides Med J	2019-03-01	PMC6474760	30817267		10.5041/RMMJ.10363
2019	Mensch J, Flynn BC.	Echocardiographic Assessment of Biventricular Function in 249 Patients During the Peri-Extracorporeal Membrane Oxygenation Period: Procedural and Ethical Questions	30448071				Other subject	0	0			1				Mensch J, Flynn BC.		J Cardiothorac Vasc Anesth. 2019 May;33(5):1331-1333. doi: 10.1053/j.jvca.2018.10.020. Epub 2018 Oct 18.	Mensch J	J Cardiothorac Vasc Anesth	2018-11-19		30448071		10.1053/j.jvca.2018.10.020
2019	Millar JE, Bartnikowski N, von Bahr V, Malfertheiner MV, Obonyo NG, Belliato M, Suen JY, Combes A, McAuley DF, Lorusso R, Fraser JF; European Extracorporeal Life Support Organisation (EuroELSO) Innovations Workgroup; National Health Medical Research Council Australia Centre of Research Excellence for Advanced Cardio-respiratory Therapies Improving Organ Support (NHMRC CREACTIONS).	Extracorporeal membrane oxygenation (ECMO) and the acute respiratory distress syndrome (ARDS): a systematic review of pre-clinical models	30911932				Other subject	0	0							Millar JE, Bartnikowski N, von Bahr V, Malfertheiner MV, Obonyo NG, Belliato M, Suen JY, Combes A, McAuley DF, Lorusso R, Fraser JF; European Extracorporeal Life Support Organisation (EuroELSO) Innovations Workgroup; National Health Medical Research Council Australia Centre of Research Excellence for Advanced Cardio-respiratory Therapies Improving Organ Support (NHMRC CREACTIONS).		Intensive Care Med Exp. 2019 Mar 25;7(1):18. doi: 10.1186/s40635-019-0232-7.	Millar JE	Intensive Care Med Exp	2019-03-27	PMC6434011	30911932		10.1186/s40635-019-0232-7
2019	Nelin LD, Potenziano JL.	Inhaled nitric oxide for neonates with persistent pulmonary hypertension of the newborn in the CINRGI study: time to treatment response	30636626				Other subject	0	0							Nelin LD, Potenziano JL.		BMC Pediatr. 2019 Jan 12;19(1):17. doi: 10.1186/s12887-018-1368-4.	Nelin LD	BMC Pediatr	2019-01-15	PMC6330425	30636626		10.1186/s12887-018-1368-4
2019	Ni YN, Wang YM, Liang BM, Liang ZA.	The effect of hyperoxia on mortality in critically ill patients: a systematic review and meta analysis	30808337				Other subject	0	0							Ni YN, Wang YM, Liang BM, Liang ZA.		BMC Pulm Med. 2019 Feb 26;19(1):53. doi: 10.1186/s12890-019-0810-1.	Ni YN	BMC Pulm Med	2019-02-28	PMC6390560	30808337		10.1186/s12890-019-0810-1
2019	Sadhwani A, Cheng H, Stopp C, Rollins CK, Jolley MA, Dunbar-Masterson C, Wypij D, Newburger J, Ware J, Thiagarajan RR.	Early Neurodevelopmental Outcomes in Children Supported with ECMO for Cardiac Indications	31079193				Other subject	0	0							Sadhwani A, Cheng H, Stopp C, Rollins CK, Jolley MA, Dunbar-Masterson C, Wypij D, Newburger J, Ware J, Thiagarajan RR.		Pediatr Cardiol. 2019 Jun;40(5):1072-1083. doi: 10.1007/s00246-019-02115-1. Epub 2019 May 11.	Sadhwani A	Pediatr Cardiol	2019-05-13	PMC6876703	31079193	NIHMS1057356	10.1007/s00246-019-02115-1
2019	Saemann L, Schmucker C, Rösner L, Beyersdorf F, Benk C.	Perfusion parameters and target values during extracorporeal cardiopulmonary resuscitation: a scoping review protocol	31473622				Other subject	0	0							Saemann L, Schmucker C, Rösner L, Beyersdorf F, Benk C.		BMJ Open. 2019 Aug 30;9(8):e030562. doi: 10.1136/bmjopen-2019-030562.	Saemann L	BMJ Open	2019-09-02	PMC6720332	31473622		10.1136/bmjopen-2019-030562
2019	Schlapbach LJ, Horton SB, Long DA, Beca J, Erickson S, Festa M, d'Udekem Y, Alphonso N, Winlaw D, Johnson K, Delzoppo C, van Loon K, Gannon B, Fooken J, Blumenthal A, Young P, Jones M, Butt W, Schibler A; NITRIC Study Group, the Australian and New Zealand Intensive Care Society Clinical Trials Group (ANZICS CTG), the Paediatric Critical Care Research group (PCCRG) and the ANZICS Paediatric Study …	Study protocol: NITric oxide during cardiopulmonary bypass to improve Recovery in Infants with Congenital heart defects (NITRIC trial): a randomised controlled trial	31420383				Other subject	0	0							Schlapbach LJ, Horton SB, Long DA, Beca J, Erickson S, Festa M, d'Udekem Y, Alphonso N, Winlaw D, Johnson K, Delzoppo C, van Loon K, Gannon B, Fooken J, Blumenthal A, Young P, Jones M, Butt W, Schibler A; NITRIC Study Group, the Australian and New Zealand Intensive Care Society Clinical Trials Group (ANZICS CTG), the Paediatric Critical Care Research group (PCCRG) and the ANZICS Paediatric Study …		BMJ Open. 2019 Aug 15;9(8):e026664. doi: 10.1136/bmjopen-2018-026664.	Schlapbach LJ	BMJ Open	2019-08-18	PMC6701583	31420383		10.1136/bmjopen-2018-026664
2019	Strassmann S, Merten M, Schäfer S, de Moll J, Brodie D, Larsson A, Windisch W, Karagiannidis C.	Impact of sweep gas flow on extracorporeal CO(2) removal (ECCO(2)R)	30911910				Other subject	0	0							Strassmann S, Merten M, Schäfer S, de Moll J, Brodie D, Larsson A, Windisch W, Karagiannidis C.		Intensive Care Med Exp. 2019 Mar 25;7(1):17. doi: 10.1186/s40635-019-0244-3.	Strassmann S	Intensive Care Med Exp	2019-03-27	PMC6434004	30911910		10.1186/s40635-019-0244-3
2019	Tramarin J, Cortegiani A, Gregoretti C, Vitale F, Palmeri C, Iozzo P, Forfori F, Giarratano A.	Regional anticoagulation with heparin of an extracorporeal CO(2) removal circuit: a case report	31046832				Other subject	0	0							Tramarin J, Cortegiani A, Gregoretti C, Vitale F, Palmeri C, Iozzo P, Forfori F, Giarratano A.		J Med Case Rep. 2019 May 3;13(1):123. doi: 10.1186/s13256-019-2051-6.	Tramarin J	J Med Case Rep	2019-05-04	PMC6498662	31046832		10.1186/s13256-019-2051-6
2019	Tsai TY, Tu KH, Tsai FC, Nan YY, Fan PC, Chang CH, Tian YC, Fang JT, Yang CW, Chen YC.	Prognostic value of endothelial biomarkers in refractory cardiogenic shock with ECLS: a prospective monocentric study	31092199				Other subject	0	0							Tsai TY, Tu KH, Tsai FC, Nan YY, Fan PC, Chang CH, Tian YC, Fang JT, Yang CW, Chen YC.		BMC Anesthesiol. 2019 May 15;19(1):73. doi: 10.1186/s12871-019-0747-1.	Tsai TY	BMC Anesthesiol	2019-05-17	PMC6521489	31092199		10.1186/s12871-019-0747-1
2019	Tschöpe C, Van Linthout S, Klein O, Mairinger T, Krackhardt F, Potapov EV, Schmidt G, Burkhoff D, Pieske B, Spillmann F.	Mechanical Unloading by Fulminant Myocarditis: LV-IMPELLA, ECMELLA, BI-PELLA, and PROPELLA Concepts	30084076				Other subject	0	0							Tschöpe C, Van Linthout S, Klein O, Mairinger T, Krackhardt F, Potapov EV, Schmidt G, Burkhoff D, Pieske B, Spillmann F.		J Cardiovasc Transl Res. 2019 Apr;12(2):116-123. doi: 10.1007/s12265-018-9820-2. Epub 2018 Aug 6.	Tschöpe C	J Cardiovasc Transl Res	2018-08-08	PMC6497621	30084076		10.1007/s12265-018-9820-2
2019	van der Zee P, Dos Reis Miranda D, Meeder H, Endeman H, Gommers D.	vvECMO can be avoided by a transpulmonary pressure guided open lung concept in patients with severe ARDS	31014380				Other subject	0	0							van der Zee P, Dos Reis Miranda D, Meeder H, Endeman H, Gommers D.		Crit Care. 2019 Apr 23;23(1):133. doi: 10.1186/s13054-019-2421-x.	van der Zee P	Crit Care	2019-04-25	PMC6480621	31014380		10.1186/s13054-019-2421-x
2019	Wada D, Hayakawa K, Maruyama S, Saito F, Kaneda H, Nakamori Y, Kuwagata Y.	A paediatric case of severe tracheobronchial injury successfully treated surgically after early CT diagnosis and ECMO safely performed in the hybrid emergency room	31014372				Other subject	0	0							Wada D, Hayakawa K, Maruyama S, Saito F, Kaneda H, Nakamori Y, Kuwagata Y.		Scand J Trauma Resusc Emerg Med. 2019 Apr 23;27(1):49. doi: 10.1186/s13049-019-0628-0.	Wada D	Scand J Trauma Resusc Emerg Med	2019-04-25	PMC6480442	31014372		10.1186/s13049-019-0628-0
2019	Wang FY, Fang B, Yu ZH, Shao JS, Wen WB, Zhou LX.	Severe thoracic trauma caused left pneumonectomy complicated by right traumatic wet lung, reversed by extracorporeal membrane oxygenation support-a case report	30727998				Other subject	0	0							Wang FY, Fang B, Yu ZH, Shao JS, Wen WB, Zhou LX.		BMC Pulm Med. 2019 Feb 6;19(1):30. doi: 10.1186/s12890-019-0790-1.	Wang FY	BMC Pulm Med	2019-02-08	PMC6366044	30727998		10.1186/s12890-019-0790-1
2019	Wang L, Yang F, Wang X, Xie H, Fan E, Ogino M, Brodie D, Wang H, Hou X.	Predicting mortality in patients undergoing VA-ECMO after coronary artery bypass grafting: the REMEMBER score	30635022				Other subject	0	0							Wang L, Yang F, Wang X, Xie H, Fan E, Ogino M, Brodie D, Wang H, Hou X.		Crit Care. 2019 Jan 11;23(1):11. doi: 10.1186/s13054-019-2307-y.	Wang L	Crit Care	2019-01-13	PMC6330483	30635022		10.1186/s13054-019-2307-y
2019	Yoshiyasu N, Kojima F, Ishikawa Y, Bando T.	Lifesaving surgery for a ruptured invasive thymoma using the hemi-clamshell approach: a case report	30783830				Other subject	0	0			0				Yoshiyasu N, Kojima F, Ishikawa Y, Bando T.		Surg Case Rep. 2019 Feb 19;5(1):35. doi: 10.1186/s40792-019-0594-9.	Yoshiyasu N	Surg Case Rep	2019-02-21	PMC6381200	30783830		10.1186/s40792-019-0594-9
2020	Ader F; Discovery French Trial Management Team.	Protocol for the DisCoVeRy trial: multicentre, adaptive, randomised trial of the safety and efficacy of treatments for COVID-19 in hospitalised adults	32958495				Other subject	0	0							Ader F; Discovery French Trial Management Team.		BMJ Open. 2020 Sep 21;10(9):e041437. doi: 10.1136/bmjopen-2020-041437.	Ader F	BMJ Open	2020-09-22	PMC7507250			10.1136/bmjopen-2020-041437
2020	Biban P, Conti G, Wolfler AM, Carlassara S, Gitto E, Rulli I, Moscatelli A, Micalizzi C, Savron F, Sagredini R, Genoni G, Binotti M, Caramelli F, Fae M, Pettenazzo A, Stritoni V, D'Amato L, Zito Marinosci G, Calderini E, Scalia Catenacci S, Berardi A, Torcetta F, Bonanomi E, Bonacina D, Ivani G, Santuz P.	Efficacy and safety of exogenous surfactant therapy in patients under 12 months of age invasively ventilated for severe bronchiolitis (SURFABRON): protocol for a multicentre, randomised, double-blind, controlled, non-profit trial	33077567				Other subject	0	0							Biban P, Conti G, Wolfler AM, Carlassara S, Gitto E, Rulli I, Moscatelli A, Micalizzi C, Savron F, Sagredini R, Genoni G, Binotti M, Caramelli F, Fae M, Pettenazzo A, Stritoni V, D'Amato L, Zito Marinosci G, Calderini E, Scalia Catenacci S, Berardi A, Torcetta F, Bonanomi E, Bonacina D, Ivani G, Santuz P.		BMJ Open. 2020 Oct 19;10(10):e038780. doi: 10.1136/bmjopen-2020-038780.	Biban P	BMJ Open	2020-10-20	PMC7574934			10.1136/bmjopen-2020-038780
2020	Combes A, Peek GJ, Hajage D, Hardy P, Abrams D, Schmidt M, Dechartres A, Elbourne D.	ECMO for severe ARDS: systematic review and individual patient data meta-analysis	33021684				Other subject	0	0							Combes A, Peek GJ, Hajage D, Hardy P, Abrams D, Schmidt M, Dechartres A, Elbourne D.		Intensive Care Med. 2020 Nov;46(11):2048-2057. doi: 10.1007/s00134-020-06248-3. Epub 2020 Oct 6.	Combes A	Intensive Care Med	2020-10-06	PMC7537368			10.1007/s00134-020-06248-3
2020	Kumakawa Y, Hirano Y, Sueyoshi K, Ishihara T, Kondo Y, Kawasaki T, Takeuchi Y, Nakamura Y, Ishikawa K, Watanabe Y, Saito W, Matsuda S, Nakazawa T, Sasaki S, Okamoto K, Hiroshi T.	Late i.v. steroid treatment for severe COVID-19-induced acute respiratory distress syndrome: a case report	33005428				Other subject	0	0							Kumakawa Y, Hirano Y, Sueyoshi K, Ishihara T, Kondo Y, Kawasaki T, Takeuchi Y, Nakamura Y, Ishikawa K, Watanabe Y, Saito W, Matsuda S, Nakazawa T, Sasaki S, Okamoto K, Hiroshi T.		Acute Med Surg. 2020 Sep 23;7(1):e569. doi: 10.1002/ams2.569. eCollection 2020 Jan-Dec.	Kumakawa Y	Acute Med Surg	2020-10-02	PMC7511560			10.1002/ams2.569
2020	Maddani SS, Deepa HC, Rao S, Chaudhuri S.	A Multicenter Cross-sectional Questionnaire-based Study to Know the Practices and Strategies of Ventilatory Management of COVID-19 Patients among the Treating Physicians	33024368				Other subject	0	0							Maddani SS, Deepa HC, Rao S, Chaudhuri S.		Indian J Crit Care Med. 2020 Aug;24(8):643-648. doi: 10.5005/jp-journals-10071-23516.	Maddani SS	Indian J Crit Care Med	2020-10-07	PMC7519590			10.5005/jp-journals-10071-23516
2020	Soll RF, Ovelman C, McGuire W.	The future of Cochrane Neonatal	33036834				Other subject	0	0							Soll RF, Ovelman C, McGuire W.		Early Hum Dev. 2020 Nov;150:105191. doi: 10.1016/j.earlhumdev.2020.105191. Epub 2020 Sep 12.	Soll RF	Early Hum Dev	2020-10-10				10.1016/j.earlhumdev.2020.105191
2018	Parker A, Knapp P, Treweek S, Madhurasinghe V, Littleford R, Gallant S, Sullivan F, Schembri S, Rick J, Graffy J, Collier DJ, Eldridge S, Kennedy A, Bower P.	The effect of optimised patient information materials on recruitment in a lung cancer screening trial: an embedded randomised recruitment trial	30227890				Other subject	0	0							Parker A, Knapp P, Treweek S, Madhurasinghe V, Littleford R, Gallant S, Sullivan F, Schembri S, Rick J, Graffy J, Collier DJ, Eldridge S, Kennedy A, Bower P.		Trials. 2018 Sep 18;19(1):503. doi: 10.1186/s13063-018-2896-9.	Parker A	Trials	2018-09-20	PMC6145341	30227890		10.1186/s13063-018-2896-9
2020	Lorusso R, Whitman G, Milojevic M, Raffa G, McMullan DM, Boeken U, Haft J, Bermudez CA, Shah AS, D'Alessandro DA; ESC Scientific Document Group.	2020 EACTS/ELSO/STS/AATS expert consensus on post-cardiotomy extracorporeal life support in adult patients	33026084				Republication	0	0							Lorusso R, Whitman G, Milojevic M, Raffa G, McMullan DM, Boeken U, Haft J, Bermudez CA, Shah AS, D'Alessandro DA; ESC Scientific Document Group.		Eur J Cardiothorac Surg. 2020 Oct 7:ezaa283. doi: 10.1093/ejcts/ezaa283. Online ahead of print.	Lorusso R	Eur J Cardiothorac Surg	2020-10-07				10.1093/ejcts/ezaa283
2020	Lorusso R, Whitman G, Milojevic M, Raffa G, McMullan DM, Boeken U, Haft J, Bermudez CA, Shah AS, D'Alessandro DA.	2020 EACTS/ELSO/STS/AATS expert consensus on post-cardiotomy extracorporeal life support in adult patients	33021558				Republication	0	0							Lorusso R, Whitman G, Milojevic M, Raffa G, McMullan DM, Boeken U, Haft J, Bermudez CA, Shah AS, D'Alessandro DA.		ASAIO J. 2020 Oct 5. doi: 10.1097/MAT.0000000000001301. Online ahead of print.	Lorusso R	ASAIO J	2020-10-06				10.1097/MAT.0000000000001301
2020	Lorusso R, Whitman G, Milojevic M, Raffa G, McMullan DM, Boeken U, Haft J, Bermudez CA, Shah AS, D'Alessandro DA.	2020 EACTS/ELSO/STS/AATS Expert Consensus on Post-Cardiotomy Extracorporeal Life Support in Adult Patients	33036737				Republication	0	0							Lorusso R, Whitman G, Milojevic M, Raffa G, McMullan DM, Boeken U, Haft J, Bermudez CA, Shah AS, D'Alessandro DA.		Ann Thorac Surg. 2020 Oct 3:S0003-4975(20)31470-3. doi: 10.1016/j.athoracsur.2020.07.009. Online ahead of print.	Lorusso R	Ann Thorac Surg	2020-10-10				10.1016/j.athoracsur.2020.07.009
2018	Oude Lansink-Hartgring A, Dos Reis Miranda D, Donker DW, Maas JJ, Delnoij T, Kuijpers M, van den Brule J, Scholten E, Endeman H, Vlaar APJ, van den Bergh WM; Dutch ECLS study group.	Cost-effectiveness in extracorporeal life support in critically ill adults in the Netherlands	29523153	Netherlands	Resource allocation	Study protocol		1	1		1				A study protocol on the cost-effectiveness of ECLS in adults ist presented. A cost-effective impact of ECLS compared to conventional care and expressed by the patients' self-assessment would be expected.	Oude Lansink-Hartgring A, Dos Reis Miranda D, Donker DW, Maas JJ, Delnoij T, Kuijpers M, van den Brule J, Scholten E, Endeman H, Vlaar APJ, van den Bergh WM; Dutch ECLS study group.		BMC Health Serv Res. 2018 Mar 9;18(1):172. doi: 10.1186/s12913-018-2964-6.	Oude Lansink-Hartgring A	BMC Health Serv Res	2018-03-11	PMC5845153	29523153		10.1186/s12913-018-2964-6
2019	Nurok M, Warsh J, Griner T, Kharabi M, Castongia J, Overbeck C, Krueger L, Coleman B, Ramzy D, Chung J, Chan A, Ley E, Kubendran S, Parrish N, Yu Z, Langberg M, Finder S, Rosen BT, Kaplan RS, Sax H, Arabia F.	Extracorporeal Membrane Oxygenation Appropriateness: An Interdisciplinary Consensus-Based Approach	29261542	USA (CA), USA (MA)	Resource allocation	Empirical study		1	1		1				Regular interdisciplinary rounds during ECMO may improve decision-making and communication to families. The consensus-based approach may reduce the duration of ECMO and the costs thereof in eventually futile cases, where disagreements between carers have led to longer duration of therapy. "..Where possible, emphasis was placed on whether ongoing ECMO support was consistent with a patient’s minima…	Nurok M, Warsh J, Griner T, Kharabi M, Castongia J, Overbeck C, Krueger L, Coleman B, Ramzy D, Chung J, Chan A, Ley E, Kubendran S, Parrish N, Yu Z, Langberg M, Finder S, Rosen BT, Kaplan RS, Sax H, Arabia F.		Anesth Analg. 2019 Mar;128(3):e38-e41. doi: 10.1213/ANE.0000000000002723.	Nurok M	Anesth Analg	2017-12-21		29261542		10.1213/ANE.0000000000002723
2016	Sen A, Callisen HE, Alwardt CM, Larson JS, Lowell AA, Libricz SL, Tarwade P, Patel BM, Ramakrishna H.	Adult venovenous extracorporeal membrane oxygenation for severe respiratory failure: Current status and future perspectives	26750681	USA (AZ)	Resource allocation	Review		1	1					1	Ethics, resources and the patient's goals of care should be balanced in a fair and compassionate way.	Sen A, Callisen HE, Alwardt CM, Larson JS, Lowell AA, Libricz SL, Tarwade P, Patel BM, Ramakrishna H.		Ann Card Anaesth. 2016 Jan-Mar;19(1):97-111. doi: 10.4103/0971-9784.173027.	Sen A	Ann Card Anaesth	2016-01-12	PMC4900379	26750681		10.4103/0971-9784.173027
2010	DeLaney E, Smith MJ, Harvey BT, Pelletier KJ, Aquino MP, Stone JM, Jean-Baptiste GC, Johnson JH.	Extracorporeal life support for pandemic influenza: the role of extracorporeal membrane oxygenation in pandemic management	21313924	USA (NY)	Resource allocation	Review		1	1				2			DeLaney E, Smith MJ, Harvey BT, Pelletier KJ, Aquino MP, Stone JM, Jean-Baptiste GC, Johnson JH.		J Extra Corpor Technol. 2010 Dec;42(4):268-80.	DeLaney E	J Extra Corpor Technol	2011-02-15	PMC4680015	21313924
2005	Wolfson RK, Kahana MD, Nachman JB, Lantos J.	Extracorporeal membrane oxygenation after stem cell transplant: clinical decision-making in the absence of evidence	15730609	USA (IL)	Trials and evidence	Case Report		1	1	1					The described case shows the ethical imperative to consider therapies that may be appropriate even without evidence predictive of success, to have entry criteria and treatment protocols for such therapies, and to collect data from such experiences to advance the standard of care.	Wolfson RK, Kahana MD, Nachman JB, Lantos J.		Pediatr Crit Care Med. 2005 Mar;6(2):200-3. doi: 10.1097/01.PCC.0000155635.02240.9C.	Wolfson RK	Pediatr Crit Care Med	2005-02-26		15730609		10.1097/01.PCC.0000155635.02240.9C
1994	Campbell TG.	Changing criteria for the artificial lung. Historic controls on the technology of ECMO	8003747	Canada	Trials and evidence	Review		1	1	0		1			A historical review of the development of ECMO is presented as an example for the introduction of unvalidated technology in research and clinical medicine. Controversies were not necessarily based in technological innovations. Study cohorts matched with historical patients remained controversial too. Before the evaluation of costs a careful analysis of quality of life and life expectancy should b…	Campbell TG.		ASAIO J. 1994 Apr-Jun;40(2):109-20.	Campbell TG	ASAIO J	1994-04-01		8003747
2019	Abrams D, Curtis JR, Prager KM, Garan AR, Hastie J, Brodie D.	Ethical Considerations for Mechanical Support	31677684	USA (NY), USA (WA)	Resource allocation	Review		1	1	0	1	1			ECLS would be able to provoke some unique ethcal challenges (price, the need of intensive care), which should be anticipated by the professional care team. Early dialogue with patients and surrogates should be targeted. It would be important to allow for continued judgement, rather then to consider default-ECLS. Economically, ECLS may change its costs over time and should be assessed in the conte…	Abrams D, Curtis JR, Prager KM, Garan AR, Hastie J, Brodie D.		Anesthesiol Clin. 2019 Dec;37(4):661-673. doi: 10.1016/j.anclin.2019.08.001. Epub 2019 Oct 11.	Abrams D	Anesthesiol Clin	2019-11-04		31677684		10.1016/j.anclin.2019.08.001
2020	Di Nardo M, Dalle Ore A, Starr J, Cecchetti C, Amodeo A, Testa G.	Ethics and extracorporeal membrane oxygenation during coronavirus disease 2019 outbreak	32580648	Italy, USA (CA)	Resource allocation	Letter to the editor		1	1	0	1	1			In line with the WHO recommendations, ECMO should be offered selected patients with acute respiratory failure due to COVID-19. A proactive development of ECMO deployment and raitoning guidelines are suggested facing the possibility of a health care sytem crush. In ethical conflicts a multivariable approach should be assessed including principles from a principlistic and a personalist bioethical s…	Di Nardo M, Dalle Ore A, Starr J, Cecchetti C, Amodeo A, Testa G.		Perfusion. 2020 Sep;35(6):562-564. doi: 10.1177/0267659120937545. Epub 2020 Jun 25.	Di Nardo M	Perfusion	2020-06-26		32580648		10.1177/0267659120937545
2020	Wheaton T, Menkiti O, Misra A.	Streptococcus pyogenes purpura fulminans and septic shock: A case highlighting the ethical considerations of high-risk extracorporeal membrane oxygenation	31984828	USA (PA)	Resource allocation	Case report		1	1	0	1	1			A paediatric case of a 3-years old child with purpura fulminans due to streptoccocus pyogenes sepsis and shock is presented. After successful decannulation but intended withdrawal of other life sustaining therapy the patient died from refractory infection. A high-risk patient candidating for ECMO should prompt a conversation involving the surrogates regarding principlist bioethics.	Wheaton T, Menkiti O, Misra A.		Int J Artif Organs. 2020 Jul;43(7):500-502. doi: 10.1177/0391398820901832. Epub 2020 Jan 25.	Wheaton T	Int J Artif Organs	2020-01-28		31984828		10.1177/0391398820901832
2012	Preston TJ, Olshove VF Jr, Chase M.	Bloodless extracorporeal membrane oxygenation in the Jehovah's Witness patient	22730863	USA (OH)	Resource allocation	Case report		1	1		1				A successful case of a non-transfused adolescent Jehovah's Witness patient through 14 days on ECMO is presented as an example of a successful deliberation process between professionals and the patient's family in which the families wishes were respected without promise.	Preston TJ, Olshove VF Jr, Chase M.		J Extra Corpor Technol. 2012 Mar;44(1):39-42.	Preston TJ	J Extra Corpor Technol	2012-06-27	PMC4557438	22730863
2014	Rojas-Peña A, Sall LE, Gravel MT, Cooley EG, Pelletier SJ, Bartlett RH, Punch JD.	Donation after circulatory determination of death: the university of michigan experience with extracorporeal support	24825520	US (MI)	EISOR	Review		1	1						The role of the treating and the harvesting physician - as in DNDD - should be strictly separated. Good and prompt communication among professionals and between professionals and relatives would be mandatory.	Rojas-Peña A, Sall LE, Gravel MT, Cooley EG, Pelletier SJ, Bartlett RH, Punch JD.		Transplantation. 2014 Aug 15;98(3):328-34. doi: 10.1097/TP.0000000000000070.	Rojas-Peña A	Transplantation	2014-05-15		24825520		10.1097/TP.0000000000000070
2019	Abrams D, Pham T, Burns KEA, Combes A, Curtis JR, Mueller T, Prager KM, Serra A, Slutsky AS, Brodie D, Schmidt M; International ECMO Network (ECMONet).	Practice Patterns and Ethical Considerations in the Management of Venovenous Extracorporeal Membrane Oxygenation Patients: An International Survey	31356471	USA (NY), Canada, France, USA (WA), Germany	Resource allocation	Empirical study		1	1			1			A scenario-based survey study on physicians' attitudes concerning the limitation of V-V ECMO in ARDS is presented. Whereas patient-level factors known to be correlated with poor prognosis, and the patient's or the surrogates' wish were associated with the respondends decision regarding the continuation or withdrawal of ECMO, the respondends reported low rates of shared decision-making and a relat…	Abrams D, Pham T, Burns KEA, Combes A, Curtis JR, Mueller T, Prager KM, Serra A, Slutsky AS, Brodie D, Schmidt M; International ECMO Network (ECMONet).		Crit Care Med. 2019 Oct;47(10):1346-1355. doi: 10.1097/CCM.0000000000003910.	Abrams D	Crit Care Med	2019-07-30		31356471		10.1097/CCM.0000000000003910
2014	Hoehn KS.	Posttraumatic stress and technology: do extracorporeal membrane oxygenation programs have an ethical obligation to provide ongoing psychological support for parents?	24492190	US (KS)	Resource allocation	Commentary		1	1						Due to the high prevalence of posttraumatic stress symptomes in parents of infants surviving ECMO, it would be an ethical imperative for professionals to address this impact of ECMO.	Hoehn KS.		Pediatr Crit Care Med. 2014 Feb;15(2):180-1. doi: 10.1097/PCC.0000000000000045.	Hoehn KS	Pediatr Crit Care Med	2014-02-05		24492190		10.1097/PCC.0000000000000045
1977	Frank HA.	Ethics of randomization: use of extracorporeal membrane oxygenation	834205	USA (MA)	Trials and evidence	Commentary		1	1	1					RCT do not best tell how well ECMO substitutes for an organ, but may allow one to decide whether organ substitution is useful in the treatment of the underlying disease. Therefore, RCT should not supplant but supplement observational studies.	Frank HA.		N Engl J Med. 1977 Feb 17;296(7):397-8.	Frank HA	N Engl J Med	1977-02-17		834205
1990	Chalmers TC.	A belated randomized control trial	2406691	USA (MA, NY)	Trials and evidence	Commentary		1	1	1					The evidence of the efficacy of ECMO is still lacking. Therefore, clinicians should prepare controlled studies and randomise their patients early, institutional review board, ethicists and third parties should support them herein. In the absence of evidence of efficacy, both the withholding and the delivery of a new treatment are equally less ethical than randomized assignment under controlled co…	Chalmers TC.		Pediatrics. 1990 Mar;85(3):366-9.	Chalmers TC	Pediatrics	1990-03-01		2406691
1990	Lantos JD, Frader J.	Extracorporeal membrane oxygenation and the ethics of clinical research in pediatrics	2196466	USA (IL), USA (PA)	Trials and evidence	Essay		1	1	1					Critics of the development and evaluation of ECMO may wish for a degree of certainty that is unattainable without the sacrifice of other important values. Therefore, a new scientific framework is needed that takes into account the inherence of uncertainty, which level will depend on how the decision-makers resolve tensions among a number of important, competing values. A given study is always nec…	Lantos JD, Frader J.		N Engl J Med. 1990 Aug 9;323(6):409-13. doi: 10.1056/NEJM199008093230610.	Lantos JD	N Engl J Med	1990-08-09		2196466		10.1056/NEJM199008093230610
1990	Miké V.	Suspended judgment. Ethics, evidence, and uncertainty	2163810	USA (NY)	Trials and evidence	Essay		1	1	1					Uncertainties are inherent in statistical inference and also seen again with ECMO trials. Mass press reporting entails the risk of obscuring medical uncertainties, such as the patient selection criteria for ECMO.	Miké V.		Control Clin Trials. 1990 Jun;11(3):153-6. doi: 10.1016/0197-2456(90)90009-q.	Miké V	Control Clin Trials	1990-06-01		2163810		10.1016/0197-2456(90)90009-q
1991	Caron E, Mitchell C.	Her only chance	1892163	USA (MA)	Resource allocation	Essay		1	1	1		1			Dilemmas about ECMO-indication show us that prognostication is necessarily subject to error. They make us understand how to avoid overconfidence in our ability to judge accurately. Moreover, they highlight our responsibility to collect data about the actual outcome, the actual harms and benefits so that we can improve our predictions on the basis of experience and thereby avoid similar dilemmas i…	Caron E, Mitchell C.		Am J Nurs. 1991 Sep;91(9):19-20.	Caron E	Am J Nurs	1991-09-01		1892163
1991	Elliott SJ.	Neonatal extracorporeal membrane oxygenation: how not to assess novel technologies	1671482	USA (TX)	Trials and evidence	Essay		1	1	1					In spite of what many pediatricians believe, neonatal ECMO is not a proven therapy. Instead it is a sad example of how irrational motives caused by early benefits in inadequately designed studies overpower reason (critique on Lantos et al.).	Elliott SJ.		Lancet. 1991 Feb 23;337(8739):476-8. doi: 10.1016/0140-6736(91)93406-y.	Elliott SJ	Lancet	1991-02-23		1671482		10.1016/0140-6736(91)93406-y
1991	Wiser LC, Miké V, Krauss AN, Ross GS, Karl TR, Frader J, Lantos J	Extracorporeal membrane oxygenation in neonates	1997860	Canada, USA (NY), Australia, USA (PA), USA (IL)	Trials and evidence	Letter		1	1	1		1			A commentary on Frader et al. and their reply. New medical technology such as ECMO should not be accepted without randomised and controlled studies (Wiser). One need not to adhere to Frader’s and Lantos’ extreme position concerning the role of RCT in scientific evidence in order to believe that more could be done in the assessment of medical technology (Miké, Krauss, Ross). RCT do not answer all …			N Engl J Med. 1991 Mar 21;324(12):849-50. doi: 10.1056/NEJM199103213241213.		N Engl J Med	1991-03-21		1997860		10.1056/NEJM199103213241213
1993	Mike V, Krauss AN, Ross GS.	Neonatal extracorporeal membrane oxygenation (ECMO): clinical trials and the ethics of evidence	8308876	USA (NY)	Trials and evidence	Essay		1	1	1					ECMO, as well as other complex medical technical innovations, is necessarily linked to the questions of scientific (un-)certainty, which can be addressed and probably solved by the concept of the ‘ethics of evidence’. This concept encourages seeking best (statistical) evidence and deliberation about the remaining uncertainty through the inclusion of interdisciplinarity, the involvement of patient…	Mike V, Krauss AN, Ross GS.		J Med Ethics. 1993 Dec;19(4):212-8. doi: 10.1136/jme.19.4.212.	Mike V	J Med Ethics	1993-12-01	PMC1376341	8308876		10.1136/jme.19.4.212
1993	Rosenberger WF, Lachin JM.	The use of response-adaptive designs in clinical trials	8119063	USA (MD)	Trials and evidence	Essay		1	1	1					Ethis should be hold against scientific gain. If an adaptive trial could be conducted without losses of statistical validity, then ethical consideration might demand their use. This should be possible in practice.	Rosenberger WF, Lachin JM.		Control Clin Trials. 1993 Dec;14(6):471-84. doi: 10.1016/0197-2456(93)90028-c.	Rosenberger WF	Control Clin Trials	1993-12-01		8119063		10.1016/0197-2456(93)90028-c
1994	Elbourne D, Grant A, Field D.	ECMO	8083873	UK	Trials and evidence	Letter		1	1	1					The authors’ experience proves the possibility of RCT in ECMO, as proposed by Miké e al.	Elbourne D, Grant A, Field D.		J Med Ethics. 1994 Jun;20(2):127. doi: 10.1136/jme.20.2.127.	Elbourne D	J Med Ethics	1994-06-01	PMC1376452	8083873		10.1136/jme.20.2.127
1994	Gamulka BD.	Ethical uncertainty: an approach to decisions involving extracorporeal membrane oxygenation	8313270	Canada	Resource allocation	Essay		1	1	1					Good evidence in ECMO is missing, whilst the future prospects of well-designed ECMO-trials seem unlikely. Therefore an individualized comprehensive approach based on professional responsibility, time, constant re-evaluation and communication integrating the sanctity-of-life and the quality-of-life principle might be the best way of dealing with this problem of factual and ethical uncertainty.	Gamulka BD.		CMAJ. 1994 Feb 15;150(4):565-8.	Gamulka BD	CMAJ	1994-02-15	PMC1486293	8313270
1995	Field D.	Ethics of consent for babies in randomised clinical trials. The Steering Committee of the Collaborative UK ECMO Trial	7619150	UK	Trials and evidence	Commentary		1	1	1					Parental informed consent should be obtained in studies concerning the neonatal intensive care. However, trust in the doctors and study investigators is important. Correspondingly, professionals and parent groups also prefer informed prior to written consent.	Field D.		Lancet. 1995 May 27;345(8961):1370.	Field D	Lancet	1995-05-27		7619150
1995	McCormick MC.	Ethics of consent for babies in randomised clinical trials	7752779	USA (MA)	Trials and evidence	Commentary		1	1	1					In respect of the experiences with the Zelen procedure in the US, this adaptive study design should not be used. It has been criticised by the US authorities (Commentary on the editorial above).	McCormick MC.		Lancet. 1995 May 27;345(8961):1370-1.	McCormick MC	Lancet	1995-05-27		7752779
1995	TheLancet	Your baby is in a trial	7898222	Not available	Trials and evidence	Editorial		1	1	1		1			Subspecialized experts, hesitating ethics committees, legal issues of protecting rather the institution or investigator than a study’s patients and their parents may all contribute to a lower than expected participation in these studies and to the patients’ loss of trust in the treating doctors.			Lancet. 1995 Apr 1;345(8953):805-6.		Lancet	1995-04-01		7898222
1996	Paris JJ, Schreiber MD.	Physicians' refusal to provide life-prolonging medical interventions	8884127	USA (MA), USA (IL)	Resource allocation	Essay		1	1	1					Historical examples of the problematic handling of limiting medical care situations show that it should neither be unilateral responsibility nor the somehow unclear meaning of the term ‘medical futility’, which should be focussed on in the debate, but the moral basis of physicians’, patients’, proxies’ and the general and medical community’s actions altogether. The responsibility of physicians as…	Paris JJ, Schreiber MD.		Clin Perinatol. 1996 Sep;23(3):563-71.	Paris JJ	Clin Perinatol	1996-09-01		8884127
1999	Allmark P.	Should Zelen pre-randomised consent designs be used in some neonatal trials?	10461596	UK	Trials and evidence	Essay		1	1	1					Zelen’s adaptive study design might help overcome some distress, when the volunteers are denied the choice of treatment possibilities like in ECMO, but it should not imply an overselling of allocated treatment, a broaching of study subjects or a bypassing of clear informative communication, since the patients’ free choice is, other things being equal, always prior to paternalism.	Allmark P.		J Med Ethics. 1999 Aug;25(4):325-9. doi: 10.1136/jme.25.4.325.	Allmark P	J Med Ethics	1999-08-26	PMC479242	10461596		10.1136/jme.25.4.325
1999	Steinhorn DM.	Termination of extracorporeal membrane oxygenation for cardiac support	10564310	USA (NY)	Resource allocation	Essay		1	1	1					As physicians, it is critically important to provide an open, clear and nonjudgmental environment for families to make decisions of ECMO withdrawal. Most physicians agree on Beauchamps’ and Childress’ ethical principles, therefore, these are a good starting point of discussion. They lead to the obligation of good communicative practice, the acceptance of the sovereignty of the concept of the pati…	Steinhorn DM.		Artif Organs. 1999 Nov;23(11):1026-30. doi: 10.1046/j.1525-1594.1999.06445.x.	Steinhorn DM	Artif Organs	1999-11-24		10564310		10.1046/j.1525-1594.1999.06445.x
2002	Fawke J, McIntyre J.	Recent advances in neonatology	11914692	UK	Resource allocation	Review		1	1	1				1	Due to newer therapeutic alternatives, infants requiring ECMO are getting sicker. Despite this, mortality for infants on ECMO has remained static. End-of-life decisions vary highly between countries.	Fawke J, McIntyre J.		Curr Opin Obstet Gynecol. 2002 Apr;14(2):153-8. doi: 10.1097/00001703-200204000-00008.	Fawke J	Curr Opin Obstet Gynecol	2002-03-27		11914692		10.1097/00001703-200204000-00008
2006	Dejohn C, Zwischenberger JB.	Ethical implications of extracorporeal interval support for organ retrieval (EISOR)	16557095	USA (TX)	EISOR	Editorial		1	1	1		1			Although EISOR appears promising in terms of improving the outcome of non-heart-beating organ donation, it also means new challenges concerning the donor’s dignity and the ethical difference of pre- and postmortem interventions.	Dejohn C, Zwischenberger JB.		ASAIO J. 2006 Mar-Apr;52(2):119-22. doi: 10.1097/01.mat.0000206486.80829.58.	Dejohn C	ASAIO J	2006-03-25		16557095		10.1097/01.mat.0000206486.80829.58
2007	Shemie SD.	Clarifying the paradigm for the ethics of donation and transplantation: was 'dead' really so clear before organ donation?	17718918	Canada	EISOR	Commentary		1	1	1					Biological death is a process, which onset is not and has never been clearly distinguishable from life. In medical practice and law the use of the absence of autoresuscitation after two minutes of cardiac arrest as a mark of the irreversible loss of brain function and personhood should be - ceteris paribus - sufficient and more adequate than other concepts of death. Criticism around the dead dono…	Shemie SD.		Philos Ethics Humanit Med. 2007 Aug 24;2:18. doi: 10.1186/1747-5341-2-18.	Shemie SD	Philos Ethics Humanit Med	2007-08-28	PMC2048971	17718918		10.1186/1747-5341-2-18
2008	Bernat JL.	The boundaries of organ donation after circulatory death	18703467	USA (NH)	EISOR	Commentary		1	1	1					Organ donation after circulatory death has become mainstream in the United States. There is an inborn risk of patients’ decision about withholding life-sustaining treatment to be driven by the need for organs, therefore, these two aspects should be strictly separated. The standard of care should be equal for both. It is discussed whether EISOR violates the dead donor rule. Prudent boundaries of t…	Bernat JL.		N Engl J Med. 2008 Aug 14;359(7):669-71. doi: 10.1056/NEJMp0804161.	Bernat JL	N Engl J Med	2008-08-16		18703467		10.1056/NEJMp0804161
2009	Crow S, Fischer AC, Schears RM.	Extracorporeal life support: utilization, cost, controversy, and ethics of trying to save lives	19713206	USA (MN), USA (TX)	Resource allocation	Review		1	1	1		1			ECMO is efficient for some patients, though the costs require thorough evaluation of the appropriateness of the treatment. Ethics depend on knowledge that the expert community prefers collected by evidence from RCT as a gold standard. However, open-mindedness in regard to not yet approved medical innovations is the true ethical imperative.	Crow S, Fischer AC, Schears RM.		Semin Cardiothorac Vasc Anesth. 2009 Sep;13(3):183-91. doi: 10.1177/1089253209347385. Epub 2009 Aug 26.	Crow S	Semin Cardiothorac Vasc Anesth	2009-08-29		19713206		10.1177/1089253209347385
2009	Verheijde JL, Rady MY, McGregor J.	Presumed consent for organ preservation in uncontrolled donation after cardiac death in the United States: a public policy with serious consequences	19772617	USA (AZ)	EISOR	Review		1	1	1					Organ donation after cessation of circulation and respiration, both controlled and uncontrolled, is ethically problematic because of the absence of an agreement on criteria for declaring death, other than brain-death, and because of the absence of reliable tests to confirm such criteria. Neither permanance nor irreversibility can be empirically determined, they are rather symptoms than a cause. E…	Verheijde JL, Rady MY, McGregor J.		Philos Ethics Humanit Med. 2009 Sep 22;4:15. doi: 10.1186/1747-5341-4-15.	Verheijde JL	Philos Ethics Humanit Med	2009-09-24	PMC2757028	19772617		10.1186/1747-5341-4-15
2010	Bernat JL, Capron AM, Bleck TP, Blosser S, Bratton SL, Childress JF, DeVita MA, Fulda GJ, Gries CJ, Mathur M, Nakagawa TA, Rushton CH, Shemie SD, White DB.	The circulatory-respiratory determination of death in organ donation	20124892	USA (NH), USA (CA), USA (IL), USA (PA), USA (UT), USA (VA), USA (DE), USA (WA), USA (NC), USA (MD), Canada	EISOR	Essay		1	1	1					The panel convened with support from the US Health Resources and Services Administration Division of Transplantation concludes that the permanence criterion of death satisfies the US Uniform Determination of Death Act, since it is congruent with the general medical standard and practice. It should refer to circulatory rather than to cardiac death, which also respects the dead donor rule. ECMO sho…	Bernat JL, Capron AM, Bleck TP, Blosser S, Bratton SL, Childress JF, DeVita MA, Fulda GJ, Gries CJ, Mathur M, Nakagawa TA, Rushton CH, Shemie SD, White DB.		Crit Care Med. 2010 Mar;38(3):963-70. doi: 10.1097/CCM.0b013e3181c58916.	Bernat JL	Crit Care Med	2010-02-04		20124892		10.1097/CCM.0b013e3181c58916
2010	Bluhm R.	The epistemology and ethics of chronic disease research: further lessons from ECMO	20333473	USA (VA)	Trials and evidence	Essay		1	1	1					In line with Robert Truog the author suggests that observational studies from large registers should complement RCT, especially in the case of rare circumstances and fatal outcomes as in ECMO. RCT always imply a trade-off between internal homogeneity and external heterogeneity, whereas observational studies in general add complexity to science.	Bluhm R.		Theor Med Bioeth. 2010 Apr;31(2):107-22. doi: 10.1007/s11017-010-9139-8.	Bluhm R	Theor Med Bioeth	2010-03-25		20333473		10.1007/s11017-010-9139-8
2010	Halpern SD, Truog RD.	Organ donors after circulatory determination of death: not necessarily dead, and it does not necessarily matter	20168173	USA (PA), USA (MA)	EISOR	Editorial		1	1	1					Organ donation after circulatory determination of death incorporating the dead donor rule presupposes the reliability of the concepts of irreversibility or permanence, which cannot be guaranteed. But organ donation does actually not require the determination of death, and hence satisfaction of the dead donor rule, at all as long the donation is the autonomous wish of the donor.	Halpern SD, Truog RD.		Crit Care Med. 2010 Mar;38(3):1011-2. doi: 10.1097/CCM.0b013e3181cc1228.	Halpern SD	Crit Care Med	2010-02-20		20168173		10.1097/CCM.0b013e3181cc1228
2010	Kissoon N, Bohn D.	Use of extracorporeal technology during pandemics: ethical and staffing considerations	21057269	Canada	Resource allocation	Essay		1	1	1					Knowledge of pediatric mass critical care is limited, ECMO can be reasonable as a therapeutic option in this case, but may also be problematic due to limited resources. Therefore a rationing plan, based on a sound ethical framework, should always be provided.	Kissoon N, Bohn D.		Pediatr Crit Care Med. 2010 Nov;11(6):757-8. doi: 10.1097/PCC.0b013e3181e288a4.	Kissoon N	Pediatr Crit Care Med	2010-11-09		21057269		10.1097/PCC.0b013e3181e288a4
2012	Mavroudis C, Mavroudis CD, Green J, Sade RM, Jacobs JP, Kodish E.	Ethical considerations for post-cardiotomy extracorporeal membrane oxygenation	23331602	USA (FL), USA (PA), USA (SC), USA (OH)	Resource allocation	Review		1	1	1					ECMO reimbursement varies among institutions and countries. Early use of ECMO may lower overall hospital costs. Moral risks of ECMO centre around the selection process, informed consent, decision making and the maintenance ECMO. There is no standard of informed consent in ECMO. It is rather an ongoing process than a single event, therefore balancing clinical data, costs, moral norms and empathic …	Mavroudis C, Mavroudis CD, Green J, Sade RM, Jacobs JP, Kodish E.		Cardiol Young. 2012 Dec;22(6):780-6. doi: 10.1017/S1047951112001540.	Mavroudis C	Cardiol Young	2013-01-22		23331602		10.1017/S1047951112001540
2013	Glannon W.	The moral insignificance of death in organ donation	23507181	Canada	EISOR	Essay		1	1	1					Death and the dead donor rule are neither necessary nor sufficient in protecting organ donors from harm. It is the respect of the autonomous consent, the irreversibility of the patient’s condition and the absence of pain and suffering that matters. The concept of permanence in organ donation after circulatory death is problematic due to physicians’ influence on the determination of death.	Glannon W.		Camb Q Healthc Ethics. 2013 Apr;22(2):192-202. doi: 10.1017/S0963180112000564.	Glannon W	Camb Q Healthc Ethics	2013-03-20		23507181		10.1017/S0963180112000564
2013	Schwartz SM, Schmidt A.	Medical and nursing care of the child on mechanical circulatory support	23735985	Canada, USA (AZ)	Resource allocation	Review		1	1	1					Decisions about discontinuing ECMO are usually ethically difficult. Therefore, it is important to involve all the relevant parts in the decision-making process early. Sufficient palliative care and staff and proxy debriefing might be helpful.	Schwartz SM, Schmidt A.		Pediatr Crit Care Med. 2013 Jun;14(5 Suppl 1):S43-50. doi: 10.1097/PCC.0b013e318292dfdc.	Schwartz SM	Pediatr Crit Care Med	2013-06-06		23735985		10.1097/PCC.0b013e318292dfdc
2014	Abrams D, Combes A, Brodie D.	What's new in extracorporeal membrane oxygenation for cardiac failure and cardiac arrest in adults?	24474528	USA (NY), France	Resource allocation	Review		1	1	1					Physicians should be aware of the economically appropriate and clinically beneficial use of ECPR.	Abrams D, Combes A, Brodie D.		Intensive Care Med. 2014 Apr;40(4):609-12. doi: 10.1007/s00134-014-3212-0. Epub 2014 Jan 29.	Abrams D	Intensive Care Med	2014-01-30		24474528		10.1007/s00134-014-3212-0
2014	Abrams DC, Prager K, Blinderman CD, Burkart KM, Brodie D.	Ethical dilemmas encountered with the use of extracorporeal membrane oxygenation in adults	24687709	USA (NY)	Resource allocation	Essay		1	1	1					The expansive use of ECMO worldwide and the lack of data call for a comprehensive development of the ethics in society. Although the comparability of withholding and withdrawal of life sustaining therapy is an generally accepted ethical principle, it is not always applicable on ECMO, for instance when the patient is awake. His or her decision concerning the withdrawal should be respected. However…	Abrams DC, Prager K, Blinderman CD, Burkart KM, Brodie D.		Chest. 2014 Apr;145(4):876-882. doi: 10.1378/chest.13-1138.	Abrams DC	Chest	2014-04-02		24687709		10.1378/chest.13-1138
2014	Baker A, Shemie SD.	Biophilosophical basis for identifying the death of a person	24930370	Canada	EISOR	Essay		1	1	1					The capacity for consciousness and self-awareness is the only irreplaceable emergent phenomenon—arising from physiologic function of the brain—that is necessary and sufficient to define the life of a person.	Baker A, Shemie SD.		J Crit Care. 2014 Aug;29(4):687-9. doi: 10.1016/j.jcrc.2014.04.013. Epub 2014 Apr 29.	Baker A	J Crit Care	2014-06-17		24930370		10.1016/j.jcrc.2014.04.013
2014	Chen YY, Chen L, Kao YH, Chu TS, Huang TS, Ko WJ.	The over-optimistic portrayal of life-supporting treatments in newspapers and on the Internet: a cross-sectional study using extra-corporeal membrane oxygenation as an example	25081491	Taiwan	Resource allocation	Empirical study		1	1	1	1	1			Taiwanese newspapers and chinese internet portray the outcome of ECMO in an over-optimistic way. Since a large proportion of the Taiwaneses population read these media, they may be influenced to have non-realistic expectations to ECMO and request its performance on a wrong foundation.	Chen YY, Chen L, Kao YH, Chu TS, Huang TS, Ko WJ.		BMC Med Ethics. 2014 Aug 1;15:59. doi: 10.1186/1472-6939-15-59.	Chen YY	BMC Med Ethics	2014-08-02	PMC4137104	25081491		10.1186/1472-6939-15-59
2014	Hayes D Jr, Black SM, Whitson BA.	Extracorporeal membrane oxygenation in pediatric organ donation	24931455	USA (OH)	EISOR	Letter to the editor		1	1	1					There is still some controversy and geographical variation concerning the use of EISOR, which is unconducive for the solution of the organ shortage in transplantation and contradicts patient autonomy. Therefore, current policies should be explicit about the possibility of ECMO in the case of organ donation.	Hayes D Jr, Black SM, Whitson BA.		Pediatr Transplant. 2014 Aug;18(5):549-50. doi: 10.1111/petr.12304. Epub 2014 Jun 14.	Hayes D Jr	Pediatr Transplant	2014-06-17		24931455		10.1111/petr.12304
2014	Meltzer EC, Ivascu NS, Acres CA, Stark M, Furman RR, Fins JJ.	Extracorporeal membrane oxygenation as a bridge to chemotherapy in an Orthodox Jewish patient	25096998	US (NY)	Resource allocation	Case report		1	1	1					A case of a jewish patient is represented, which shows that preemptive ethical deliberation between professionals, proxies and clerics can mitigate distress in the planning of ECMO discontinuation.	Meltzer EC, Ivascu NS, Acres CA, Stark M, Furman RR, Fins JJ.		Oncologist. 2014 Sep;19(9):985-9. doi: 10.1634/theoncologist.2014-0025. Epub 2014 Aug 5.	Meltzer EC	Oncologist	2014-08-07	PMC4153457	25096998		10.1634/theoncologist.2014-0025
2014	Meltzer EC, Ivascu NS, Acres CA, Stark M, Kirkpatrick JN, Paul S, Sedrakyan A, Fins JJ.	Extracorporeal membrane oxygenation in adults: a brief review and ethical considerations for nonspecialist health providers and hospitalists	25332093	USA (NY), USA (PA)	Resource allocation	Essay		1	1	1					Deciding about ECMO needs the ongoing dialogical ascertainment of the patient’s consent if possible and, when incapacitated, the assistance of a patient-designated agent, official guardian, a spouse, an adult child, a parent, a sibling or other relatives in an empathic and anticipating way. The course should be re-evaluated frequently, balancing goals and burdens.	Meltzer EC, Ivascu NS, Acres CA, Stark M, Kirkpatrick JN, Paul S, Sedrakyan A, Fins JJ.		J Hosp Med. 2014 Dec;9(12):808-13. doi: 10.1002/jhm.2262. Epub 2014 Oct 21.	Meltzer EC	J Hosp Med	2014-10-22		25332093		10.1002/jhm.2262
2014	Shankar V, Costello JP, Peer SM, Klugman D, Nath DS.	Ethical dilemma: offering short-term extracorporeal membrane oxygenation support for terminally ill children who are not candidates for long-term mechanical circulatory support or heart transplantation	24668981	USA (DC)	Resource allocation	Case report		1	1	1					The use of ECMO in terminally ill pediatric patients who are not candidates for long-term mechanical circulatory support or heart transplantation is a reality in critical care and requires careful deliberation, balancing futility, patient and proxy wishes and best interests in a multidisciplinary approach with the patient’s actual and eventual quality of life in the centre.	Shankar V, Costello JP, Peer SM, Klugman D, Nath DS.		World J Pediatr Congenit Heart Surg. 2014 Apr;5(2):311-4. doi: 10.1177/2150135113509820.	Shankar V	World J Pediatr Congenit Heart Surg	2014-03-27		24668981		10.1177/2150135113509820
2014	Shemie SD, Baker A.	Where have we been? Where are we going? Initiatives to improve uniformity of policies, integrity of practice, and improve understanding of brain death within the global medical community and lay public	25201431	Canada	EISOR	Essay		1	1	1					ECMO has changed our understanding of human viability and personhood. However, abandoning the dead donor rule may jeopardise the public’s trust in modern medicine. Although there is emerging acceptance of the fact that death occurs only through the loss of brain function, further research about donation after circulatory death and the role of brain function herein is needed. There should be an in…	Shemie SD, Baker A.		J Crit Care. 2014 Dec;29(6):1114-6. doi: 10.1016/j.jcrc.2014.08.007. Epub 2014 Aug 15.	Shemie SD	J Crit Care	2014-09-10		25201431		10.1016/j.jcrc.2014.08.007
2014	Wall SP, Munjal KG, Dubler NN, Goldfrank LR; NYC uDCDD Study Group.	Uncontrolled organ donation after circulatory determination of death: US policy failures and call to action	24268427	USA (NY)	EISOR	Essay		1	1	1					Evidence from several countries suggests that uncontrolled donation after circulatory determination of death (uDCDD) is feasible. After 30 min of unsuccessful resuscitation and 5 min ‘hands-off’ a given situation must be declared futile. Death can be assessed following the concept of the irreversible cessation of circulatory and respiratory functions, evidenced by the persistent cessation of thes…	Wall SP, Munjal KG, Dubler NN, Goldfrank LR; NYC uDCDD Study Group.		Ann Emerg Med. 2014 Apr;63(4):392-400. doi: 10.1016/j.annemergmed.2013.10.014. Epub 2013 Nov 20.	Wall SP	Ann Emerg Med	2013-11-26		24268427		10.1016/j.annemergmed.2013.10.014
2015	Bein T, Weber-Carstens S, Herridge M.	Extracorporeal life support, ethics, and questions at the bedside: how does the end of the pathway look?	25711471	GER, Canada	Resource allocation	Essay		1	1	1		1			The goal of ECMO (bridge to recovery, guarantee of the status quo or prohibition of dying?) should be reflected on using an integrative approach including professionals and proxies.	Bein T, Weber-Carstens S, Herridge M.		Intensive Care Med. 2015 Sep;41(9):1714-5. doi: 10.1007/s00134-015-3696-2. Epub 2015 Feb 25.	Bein T	Intensive Care Med	2015-02-26		25711471		10.1007/s00134-015-3696-2
2015	Geiger JD, Hirschl RB.	Innovation in surgical technology and techniques: Challenges and ethical issues	25976146	USA (MI)	Trials and evidence	Commentary		1	1	1					ECMO-technology may be used in the grey zone between research and individual off-label use. Ethical conflict may then be minimized by obtaining the patient’s informed consent, involving skilled practitioners, by the use of registries and of formal research as early as possible.	Geiger JD, Hirschl RB.		Semin Pediatr Surg. 2015 Jun;24(3):115-21. doi: 10.1053/j.sempedsurg.2015.02.008. Epub 2015 Mar 2.	Geiger JD	Semin Pediatr Surg	2015-05-16		25976146		10.1053/j.sempedsurg.2015.02.008
2015	Peetz AB, Sadovnikoff N, O'Connor MF.	Is informed consent for extracorporeal life support even possible?	25813590	USA (MA), USA (IL)	Resource allocation	Essay		1	1	1		1			ECLS would mean emergent conditions, limited mental capacity and time, the use of a drastic, experimental and complex technique. All of these being obstacles for the ideal informed consent. Therefore, informed consent for ECLS is typically an unrealistic scenario.	Peetz AB, Sadovnikoff N, O'Connor MF.		AMA J Ethics. 2015 Mar 1;17(3):236-42. doi: 10.1001/journalofethics.2015.17.3.stas1-1503.	Peetz AB	AMA J Ethics	2015-03-28		25813590		10.1001/journalofethics.2015.17.3.stas1-1503
2015	Ramanathan K, Cove ME, Caleb MG, Teoh KL, Maclaren G.	Ethical dilemmas of adult ECMO: emerging conceptual challenges	25440649	Singapore	Resource allocation	Essay		1	1	1	1	1			ECMO may present a conflict between medical expertise and patient autonomy respectively between quality and sanctity of life. The valuation of quality indicators may differ among individuals making it difficult to generalise any approach as the ‘best-interest standard’. Although in the centre, patients and proxies should not be put in the driver’s seat. Guidelines, clear and repeated information,…	Ramanathan K, Cove ME, Caleb MG, Teoh KL, Maclaren G.		J Cardiothorac Vasc Anesth. 2015 Feb;29(1):229-33. doi: 10.1053/j.jvca.2014.07.015. Epub 2014 Oct 23.	Ramanathan K	J Cardiothorac Vasc Anesth	2014-12-03		25440649		10.1053/j.jvca.2014.07.015
2015	Riggs KR, Becker LB, Sugarman J.	Ethics in the use of extracorporeal cardiopulmonary resuscitation in adults	25866287	USA (MD), USA (PA)	Resource allocation	Commentary		1	1	1					The individual outcome of ECPR may be unclear and data are generally poor. It might be considered as worse than death. Obtaining consent is difficult and single prognostic criteria may be misinterpreted. Therefore, further research about the short and the long run after hospitalisation are needed and should include retro- and prospective randomised trials. Transparent guidelines should be develop…	Riggs KR, Becker LB, Sugarman J.		Resuscitation. 2015 Jun;91:73-5. doi: 10.1016/j.resuscitation.2015.03.021. Epub 2015 Apr 9.	Riggs KR	Resuscitation	2015-04-14	PMC4433606	25866287	NIHMS679805	10.1016/j.resuscitation.2015.03.021
2015	Statter MB.	"Just because you can--doesn't mean you should"	25981276	USA (NY)	Resource allocation	Case report		1	1	1					In neonatal ECMO a conflict may appear between the part of the infant’s parent and its treating professional. This conflict may be minimised by the medical team’s prior consensus, the incorporation of the goals of ECMO into the best interest analysis of the patient and an individualized approach with a clear and consistent dialogue.	Statter MB.		Narrat Inq Bioeth. 2015 Spring;5(1):22-4. doi: 10.1353/nib.2015.0014.	Statter MB	Narrat Inq Bioeth	2015-05-19		25981276		10.1353/nib.2015.0014
2015	Truog RD, Thiagarajan RR, Harrison CH.	Ethical dilemmas with the use of ECMO as a bridge to transplantation	26201841	USA (MA)	Resource allocation	Commentary		1	1	1					In the ethical dilemma of the withdrawal of ECMO between one position, which advocates for a ‘hard’ withdrawal as soon as the initial goal (fx transplantation) is abandoned, and the opposing position, which supports an unlimited course of ECMO as long as there is the experience of quality of life, there might be an alternative path in fading the ECMO out, fx by not replacing a failing oxygenator.	Truog RD, Thiagarajan RR, Harrison CH.		Lancet Respir Med. 2015 Aug;3(8):597-8. doi: 10.1016/S2213-2600(15)00233-7. Epub 2015 Jul 19.	Truog RD	Lancet Respir Med	2015-07-24		26201841		10.1016/S2213-2600(15)00233-7
2016	Bartlett RH.	Clinical Research in Acute Fatal Illness: Lessons From Extracorporeal Membrane Oxygenation	25223826	USA (MI)	Trials and evidence	Review		1	1	1					Randomized controlled trials in life support are ethically problematic as long as clinical equipoise is not given beforehand. Adaptive study designs minimize but do not solve this problem. Therefore, matched pairs designs are the best alternative.	Bartlett RH.		J Intensive Care Med. 2016 Aug;31(7):456-65. doi: 10.1177/0885066614550278. Epub 2014 Sep 15.	Bartlett RH	J Intensive Care Med	2014-09-17		25223826		10.1177/0885066614550278
2016	Courtwright AM, Robinson EM, Feins K, Carr-Loveland J, Donahue V, Roy N, McCannon J.	Ethics Committee Consultation and Extracorporeal Membrane Oxygenation	27299991	USA (MA)	Resource allocation	Empirical study		1	1	1		1			Routine integration of ethics consultation into the care of ECMO patients showed that most of the ethical questions about ECMO resembled traditional concerns about the appropriate use of any life-sustaining treatment, like the uncertainty or disagreement about the state and goals of treatment. Though was the metaphor of “bridging”to recovery more common and sustained conversation more uncommon. M…	Courtwright AM, Robinson EM, Feins K, Carr-Loveland J, Donahue V, Roy N, McCannon J.		Ann Am Thorac Soc. 2016 Sep;13(9):1553-8. doi: 10.1513/AnnalsATS.201511-757OC.	Courtwright AM	Ann Am Thorac Soc	2016-06-15	PMC5059495	27299991		10.1513/AnnalsATS.201511-757OC
2016	Dalle Ave AL, Gardiner D, Shaw DM.	The ethics of extracorporeal membrane oxygenation in brain-dead potential organ donors	26987689	Switzerland, UK	EISOR	Essay		1	1	1		1			ECLS should be considered for unstable brain‐dead potential organ donors, for the reason of the saving of organs that would otherwise be lost. The donor should be declared brain-dead prior to ECLS and should have given consent (alt. surrogate consent). In cases where brain death is developed on ECLS, there is little additional ethical concern using ECLS. One should consider the possible harm of E…	Dalle Ave AL, Gardiner D, Shaw DM.		Transpl Int. 2016 May;29(5):612-8. doi: 10.1111/tri.12772.	Dalle Ave AL	Transpl Int	2016-03-19		26987689		10.1111/tri.12772
2016	Dalle Ave AL, Shaw DM, Bernat JL.	Ethical Issues in the Use of Extracorporeal Membrane Oxygenation in Controlled Donation After Circulatory Determination of Death	26999771	Switzerland, USA (NH)	EISOR	Commentary		1	1	1		1			EISOR can encumber end‐of‐life care, revive the declared dead, inflict physical harm on the patient and cause distress for the family and professionals. Until pre- or postmortem ECMO is shown to improve future graft outcome, other techniques should be prefered because they avoid the ethical issues.	Dalle Ave AL, Shaw DM, Bernat JL.		Am J Transplant. 2016 Aug;16(8):2293-9. doi: 10.1111/ajt.13792. Epub 2016 Apr 19.	Dalle Ave AL	Am J Transplant	2016-03-22		26999771		10.1111/ajt.13792
2016	Dalle Ave AL, Shaw DM, Gardiner D.	Extracorporeal membrane oxygenation (ECMO) assisted cardiopulmonary resuscitation or uncontrolled donation after the circulatory determination of death following out-of-hospital refractory cardiac arrest-An ethical analysis of an unresolved clinical dilemma	27449821	Switzerland, UK	EISOR	Review		1	1	1		1			Due to the similarity of indications of ECPR and uDCDD from ECMO, there is an inborn risk of including a patient in the uDCDD-protocol, who otherwise would have survived on ECPR. Therefore, international guidelines for the termination of resuscitation, the avoidance of decisions during transport, the exclusion of non-excellent centers for uDCDD programs, the priority of ECPR and the avoidance of …	Dalle Ave AL, Shaw DM, Gardiner D.		Resuscitation. 2016 Nov;108:87-94. doi: 10.1016/j.resuscitation.2016.07.003. Epub 2016 Jul 20.	Dalle Ave AL	Resuscitation	2016-07-25		27449821		10.1016/j.resuscitation.2016.07.003
2016	Fleischman AR.	Ethical issues in neonatal research involving human subjects	26804381	USA (NY)	Trials and evidence	Essay		1	1	1					Clinical research on neonates has resulted in extraordinary advances and decreased mortality in neonatal care, therefore, well-designed and -scrutinized studies are essential to improve children’s treatment. Scrutiny should be shown in the protection of participants by the investigators, sponsors, IRBs, research institutions, regulators, and government policy-makers. Consent should be sought beca…	Fleischman AR.		Semin Perinatol. 2016 Jun;40(4):247-53. doi: 10.1053/j.semperi.2015.12.014. Epub 2016 Jan 21.	Fleischman AR	Semin Perinatol	2016-01-26		26804381		10.1053/j.semperi.2015.12.014
2016	Fuehner T, Kuehn C, Welte T, Gottlieb J.	ICU Care Before and After Lung Transplantation	26953218	Germany	Resource allocation	Review		1	1	1					All alternatives and contraindications to lung transplantation and its prospects should be assessed before commencing ECLS. No clinical standards exist for ECLS withdrawal, which is necessarily individual and influenced by regional and ethical heterogeneity.	Fuehner T, Kuehn C, Welte T, Gottlieb J.		Chest. 2016 Aug;150(2):442-50. doi: 10.1016/j.chest.2016.02.656. Epub 2016 Mar 4.	Fuehner T	Chest	2016-03-09		26953218		10.1016/j.chest.2016.02.656
2016	Kukora S, Laventhal N.	Choosing wisely: should past medical decisions impact the allocation of scarce ECMO resources?	27146166	USA (MI)	Resource allocation	Commentary		1	1	1					Scarce ECMO-resources in a H1N1-epidemic should be allocated to vaccinated adults needing it. Adults who refuse the vaccination should be given a lower priority in coherence with consequentialistic, fairness and virtue ethics.	Kukora S, Laventhal N.		Acta Paediatr. 2016 Aug;105(8):876-8. doi: 10.1111/apa.13457. Epub 2016 Jun 2.	Kukora S	Acta Paediatr	2016-05-06		27146166		10.1111/apa.13457
2016	Meltzer EC, Ivascu NS, Stark M, Orfanos AV, Acres CA, Christos PJ, Mangione T, Fins JJ.	A Survey of Physicians' Attitudes toward Decision-Making Authority for Initiating and Withdrawing VA-ECMO: Results and Ethical Implications for Shared Decision Making	28001135	USA (NY), USA (VT), USA (MA)	Resource allocation	Empirical study		1	1	1					In contrast to general principles in medical ethics, the majority of a group of surveyed physicians advocates for their discretion in limiting care decisions concerning VA-ECMO. The reason for this could be an attempt to manage the knowledge gap between professionals and patients respectively their families, to avoid the distress of end-of-life conflicts and to use scarce resources in a responsib…	Meltzer EC, Ivascu NS, Stark M, Orfanos AV, Acres CA, Christos PJ, Mangione T, Fins JJ.		J Clin Ethics. 2016 Winter;27(4):281-289. doi: 10.2217/bmm.10.117.	Meltzer EC	J Clin Ethics	2016-12-22	PMC5735424	28001135	NIHMS925293	10.2217/bmm.10.117
2016	Moon SM, Lee H, Moon JH, Kim HK, Park JE, Byeon S, Suh GY, Chung CR.	Prolonged Maintenance of VV ECMO for 104 Days with Native Lung Recovery in Acute Respiratory Failure	26461237	South Korea	Resource allocation	Case report		1	1	1					A case of late recovery from a lung injury on ECMO is presented. Knowledge of irreversibility is poor, hence it is challenging to limit ECMO, especially when lung transplantation is refused.	Moon SM, Lee H, Moon JH, Kim HK, Park JE, Byeon S, Suh GY, Chung CR.		ASAIO J. 2016 Mar-Apr;62(2):e15-7. doi: 10.1097/MAT.0000000000000293.	Moon SM	ASAIO J	2015-10-14		26461237		10.1097/MAT.0000000000000293
2017	Bein T, Brodie D.	Understanding ethical decisions for patients on extracorporeal life support	28349177	Germany, USA (NY)	Resource allocation	Commentary		1	1	1					ECMO provokes a new thinking about medical ethics. Patients and relatives may be overwhelmed by end-of-life decisions on ECMO and should be guided closely through an open and empathic dialogue and an advance care planning and be supported by mandatory ethics consultation and spiritual and palliative care providers if necessary. The goals of therapy (bridge to recovery, guarantee of a status quo o…	Bein T, Brodie D.		Intensive Care Med. 2017 Oct;43(10):1510-1511. doi: 10.1007/s00134-017-4781-5. Epub 2017 Mar 27.	Bein T	Intensive Care Med	2017-03-29	PMC5610199	28349177		10.1007/s00134-017-4781-5
2017	Bhatnagar SN, Sarin YK.	Management of Congenital Diaphragmatic Hernia in Newborn - Paradigm Shift and Ethical Issues	28620733	India	Resource allocation	Review		1	1	1					Scarcity of ECMO-resources would be an issue also in neonatology in India. There would still be little evidence of when to withhold treatment in neonates with significant morbidity. Endeavor should be research and the development of best practice.	Bhatnagar SN, Sarin YK.		Indian J Pediatr. 2017 Aug;84(8):629-635. doi: 10.1007/s12098-017-2374-5. Epub 2017 Jun 16.	Bhatnagar SN	Indian J Pediatr	2017-06-17		28620733		10.1007/s12098-017-2374-5
2017	Brodie D, Curtis JR, Vincent JL, Bakker J, Brown CE, Creteur J, Papazian L, Sladen RN, Ranieri VM; participants in the Round Table Conference.	Treatment limitations in the era of ECMO	28705688	USA (NY), USA (WA), Belgium, Netherlands, France, Italy	Resource allocation	Expert opinion		1	1	1					Among others the ethical challenges of ECMO also lie in the potential impact on our current code status of patients. Instead of checklists, physician’s efforts should be made in relation to the deliberation process together with their patients and their surrogates in a multidisciplinary manner.	Brodie D, Curtis JR, Vincent JL, Bakker J, Brown CE, Creteur J, Papazian L, Sladen RN, Ranieri VM; participants in the Round Table Conference.		Lancet Respir Med. 2017 Oct;5(10):769-770. doi: 10.1016/S2213-2600(17)30263-1. Epub 2017 Jul 10.	Brodie D	Lancet Respir Med	2017-07-15		28705688		10.1016/S2213-2600(17)30263-1
2017	Dalle Ave AL, Bernat JL.	Donation after brain circulation determination of death	28228145	Switzerland, USA (NH)	EISOR	Essay		1	1	1		1			Death should be defined as the permanent cessation of brain function and be assessed, either prospectively by the permanent cessation of brain circulation in circulatory death or retrospectively by the irreversible cessation of brain function in cases of brain damage. For the retrieval of donor organs in circulatory death the term “donation after brain circulation determination of death”, DBCDD, …	Dalle Ave AL, Bernat JL.		BMC Med Ethics. 2017 Feb 23;18(1):15. doi: 10.1186/s12910-017-0173-1.	Dalle Ave AL	BMC Med Ethics	2017-02-24	PMC5322624	28228145		10.1186/s12910-017-0173-1
2017	Makdisi T, Makdisi G.	Extra corporeal membrane oxygenation support: ethical dilemmas	28361077	USA (MA), USA (FL)	Resource allocation	Essay		1	1	1					The ECMO-team should define the goals of a given ECMO-treatment on daily bases. Novel ethical questions emerge related to ECMO-indication, -duration and withdrawal, patient’s dignity, fair resource allocation, the role of surrogates in decision making, the appropriateness of ECMO in DBDD and the obligation to transfer patients to regional ECMO-centres when indicated. In view of the difficult circ…	Makdisi T, Makdisi G.		Ann Transl Med. 2017 Mar;5(5):112. doi: 10.21037/atm.2017.01.38.	Makdisi T	Ann Transl Med	2017-04-01	PMC5360601	28361077		10.21037/atm.2017.01.38
2017	Ting PS, Chen L, Yang WC, Huang TS, Wu CC, Chen YY.	Gender and age disparity in the initiation of life-supporting treatments: a population-based cohort study	29141641	Taiwan	Resource allocation	Empirical study		1	1	1					In Taiwan both men and elder people are overrepresented. The reason for this may be cultural. Therefore physicians should be sensitive to those aspects when deciding about the indication for ECMO or its withdrawal.	Ting PS, Chen L, Yang WC, Huang TS, Wu CC, Chen YY.		BMC Med Ethics. 2017 Nov 15;18(1):62. doi: 10.1186/s12910-017-0222-9.	Ting PS	BMC Med Ethics	2017-11-17	PMC5688717	29141641		10.1186/s12910-017-0222-9
2017	Whitman GJ.	Extracorporeal membrane oxygenation for the treatment of postcardiotomy shock	27666787	USA (MD)	Resource allocation	Essay		1	1	1					The cost of ECMO would be a burden to the caregivers just as the novel responsibility to honour not only life but also death. Commonly, families would be unable to negotiate the difficulty of making any decision. Therefore physicians should be prepared for the patient’s and his or her families’ guidance by consented counseling through ethics committee consultation and expert deliberation as it is…	Whitman GJ.		J Thorac Cardiovasc Surg. 2017 Jan;153(1):95-101. doi: 10.1016/j.jtcvs.2016.08.024. Epub 2016 Aug 31.	Whitman GJ	J Thorac Cardiovasc Surg	2016-09-27		27666787		10.1016/j.jtcvs.2016.08.024
2018	Peterec SM, Bizzarro MJ, Mercurio MR.	Is Extracorporeal Membrane Oxygenation for a Neonate Ever Ethically Obligatory?	29248183	USA (CT)	Resource allocation	Case report		1	1	1	1	1			ECMO for meconium aspiration syndrome would have a qualitative and quantitative outcome comparable to other life-saving-treatments in neonatology or congenital cardiac surgery. Therefore, ECMO, when feasible, should be an obligatory treatment strategy in such cases, following the principle of the child’s best interest. Consistency in our ethical reasoning, and in how we approach candidate treatme…	Peterec SM, Bizzarro MJ, Mercurio MR.		J Pediatr. 2018 Apr;195:297-301. doi: 10.1016/j.jpeds.2017.11.018. Epub 2017 Dec 13.	Peterec SM	J Pediatr	2017-12-18		29248183		10.1016/j.jpeds.2017.11.018
2019	Ares GJ, Buonpane C, Helenowski I, Reynolds M, Hunter CJ.	Outcomes and associated ethical considerations of long-run pediatric ECMO at a single center institution	30683989	USA (IL)	Resource allocation	Empirical study		1	1	1					Long run ECMO in children is correlated with higher mortality and morbidity. Larger register studies are required to support these outcomes and to guide clinicians in their open and timely deliberation of relevant cases.	Ares GJ, Buonpane C, Helenowski I, Reynolds M, Hunter CJ.		Pediatr Surg Int. 2019 Mar;35(3):321-328. doi: 10.1007/s00383-019-04443-y. Epub 2019 Jan 25.	Ares GJ	Pediatr Surg Int	2019-01-27	PMC6433597	30683989	NIHMS1018607	10.1007/s00383-019-04443-y
2019	Blythe JA, Wieten SE, Batten JN.	Response to "Will We Code for Default ECMO?": Clarifying the Scope of Do-Not-ECMO Orders	31651394	USA (CA)	Resource allocation	Commentary		1	1	1		1			Clinicians might misinterpret the scope of a DNE (do-not-ECLS), as they do with the DNR (do-not-resuscita). ECLS could be a component of CPR but also be used in other contexts. Therefore, clinicians and ethicists should work on narrowing the scope of a eventual default status of ECLS.	Blythe JA, Wieten SE, Batten JN.		AMA J Ethics. 2019 Oct 1;21(10):E926-929. doi: 10.1001/amajethics.2019.926.	Blythe JA	AMA J Ethics	2019-10-26		31651394		10.1001/amajethics.2019.926
2019	Brauner DJ, Zimmermann CJ.	Will We Code for Default ECMO?	31127925	USA (IL), USA (WI)	Resource allocation	Commentary		1	1	1		1			The history of cardiopulmonary resuscitation could teach us how therapeutic innovations influence the default indication for treatment primarily through the public’s expectations, the technical imperative and billing possabilities. However, cardiac arrest should never become a blanket indication for neither CPR nor ECLS.	Brauner DJ, Zimmermann CJ.		AMA J Ethics. 2019 May 1;21(5):E443-449. doi: 10.1001/amajethics.2019.443.	Brauner DJ	AMA J Ethics	2019-05-26		31127925		10.1001/amajethics.2019.443
2019	Di Nardo M, Dalle Ore A, Testa G, Annich G, Piervincenzi E, Zampini G, Bottari G, Cecchetti C, Amodeo A, Lorusso R, Del Sorbo L, Kirsch R.	Principlism and Personalism. Comparing Two Ethical Models Applied Clinically in Neonates Undergoing Extracorporeal Membrane Oxygenation Support	31417882	Italy, Canada, Netherlands	Resource allocation	Essay		1	1	1					The Principlist bioethics system would seek to balance four non-hierarchical principles: autonomy, beneficence, non-maleficence, and justice when making treatment decisions. In contrast, the Personalist bioethical approach would highlight the sanctity of the entire physical and spiritual human life. It would be supplied by the principle of proportionate therapy and the principle of sociality and …	Di Nardo M, Dalle Ore A, Testa G, Annich G, Piervincenzi E, Zampini G, Bottari G, Cecchetti C, Amodeo A, Lorusso R, Del Sorbo L, Kirsch R.		Front Pediatr. 2019 Jul 30;7:312. doi: 10.3389/fped.2019.00312. eCollection 2019.	Di Nardo M	Front Pediatr	2019-08-17	PMC6682695	31417882		10.3389/fped.2019.00312
1997	Lantos JD.	Was the UK collaborative ECMO trial ethical?	11644992	US (KA)	Trials and evidence	Commentary		1	1						The nature of statistical evidence would necessarily require the evaluation and decision of whether the intervention studied were effective and benificial. This would apply to ECMO too. Evidence would not be dichotomic in the sence that required the conduct of RCT, which could be limited by practical or ethical reasons as it would be the case in ECMO.	Lantos JD.		Paediatr Perinat Epidemiol. 1997 Jul;11(3):264-8. doi: 10.1111/j.1365-3016.1997.tb00003.x.	Lantos JD	Paediatr Perinat Epidemiol	1997-07-01		11644992		10.1111/j.1365-3016.1997.tb00003.x
2008	Worrall J.	Evidence and ethics in medicine	18723945	UK	Trials and evidence	Case report		1	1						In medical science and practice ethics and epistemology influence and presuppose each other in both directions, hence an informed view on both ethics and evidence is required in order to decide rationally and rightly.	Worrall J.		Perspect Biol Med. 2008 Summer;51(3):418-31. doi: 10.1353/pbm.0.0040.	Worrall J	Perspect Biol Med	2008-08-30		18723945		10.1353/pbm.0.0040
2015	Balsorano P, Ciapetti M, Cianchi G, Bonizzoli M, Migliaccio ML, Ferraro MC, Franci A, Peris A.	Extracorporeal life support and multiorgan donation in a severe polytrauma patient: A case report	25756801	Italy	EISOR	Case report		1	1		1	1			A case of EISOR in a polytrauma patient ist presented. The use of ECMO in a context of brain-dead diagostics could be seen as a tool for organ preservation instead of a tool for patient support. A gray zone of diverting interests may remain.	Balsorano P, Ciapetti M, Cianchi G, Bonizzoli M, Migliaccio ML, Ferraro MC, Franci A, Peris A.		Int J Surg Case Rep. 2015;9:109-11. doi: 10.1016/j.ijscr.2015.02.054. Epub 2015 Mar 4.	Balsorano P	Int J Surg Case Rep	2015-03-11	PMC4392376	25756801		10.1016/j.ijscr.2015.02.054
2015	Pujara D, Sandoval E, Simpson L, Mallidi HR, Singh SK.	The State of the Art in Extracorporeal Membrane Oxygenation	26074105	US (TX)	Resource allocation	Review		1	1					1	Goals of care should be disussed promptly after initiation of ECMO. Relatives should be informed about the typical risks at that time, but there were no ECMO-specifik risk scores to predict outcomes. Do-not-resuscitat orderes were incompatible with the idea of V-A ECMO	Pujara D, Sandoval E, Simpson L, Mallidi HR, Singh SK.		Semin Thorac Cardiovasc Surg. 2015 Spring;27(1):17-23. doi: 10.1053/j.semtcvs.2015.02.004. Epub 2015 Feb 25.	Pujara D	Semin Thorac Cardiovasc Surg	2015-06-16		26074105		10.1053/j.semtcvs.2015.02.004
2016	Buchtele N, Schellongowski P, Bojic A, Hermann A, Robak O, Lamm W, Staudinger T.	Successful weaning from 65-day extracorporeal membrane oxygenation therapy in influenza-associated acute respiratory distress syndrome	27338282	Austria	Resource allocation	Case report		1	1			1			A case of prolonged ECMO run is presented. Although prognostik data for a goog outcome are rare, it is suggested to maintaine therapy as long signs of multiorgan failure or irreversible lung injury are absent.	Buchtele N, Schellongowski P, Bojic A, Hermann A, Robak O, Lamm W, Staudinger T.		Int J Artif Organs. 2016 Jul 4;39(5):249-52. doi: 10.5301/ijao.5000501. Epub 2016 Jun 23.	Buchtele N	Int J Artif Organs	2016-06-25		27338282		10.5301/ijao.5000501
2016	Fan E, Gattinoni L, Combes A, Schmidt M, Peek G, Brodie D, Muller T, Morelli A, Ranieri VM, Pesenti A, Brochard L, Hodgson C, Van Kiersbilck C, Roch A, Quintel M, Papazian L.	Venovenous extracorporeal membrane oxygenation for acute respiratory failure : A clinical review from an international group of experts	27007108	Canada, Italy, France, USA (NY), Germany, Australia	Resource allocation	Review		1	1						There were only a few studies on the long term outcomes of ECMO. In the case of ARDS most studies show results comparable to conventional therapy with a poorer physical state of the patients compared to a sex- and gender-matched cohort. Futile ECMO should be avoided by consequently defining the therapeutical goals (if recovery and transplantation are excluded, ECMO would be contraindicated as fut…	Fan E, Gattinoni L, Combes A, Schmidt M, Peek G, Brodie D, Muller T, Morelli A, Ranieri VM, Pesenti A, Brochard L, Hodgson C, Van Kiersbilck C, Roch A, Quintel M, Papazian L.		Intensive Care Med. 2016 May;42(5):712-724. doi: 10.1007/s00134-016-4314-7. Epub 2016 Mar 23.	Fan E	Intensive Care Med	2016-03-24		27007108		10.1007/s00134-016-4314-7
2017	Carlsen AW, Winnerkvist AM, Greiff G.	A 95 year-old suffering circulatory arrest after accidental hypothermia: a case report	29070019	Norway	Resource allocation	Case report		1	1		1	1			Decision-making in the elderly population might be challenging in the emergent situation. Decision making would be made in a time-sensitive manner.	Carlsen AW, Winnerkvist AM, Greiff G.		BMC Geriatr. 2017 Oct 26;17(1):249. doi: 10.1186/s12877-017-0646-6.	Carlsen AW	BMC Geriatr	2017-10-27	PMC5657076	29070019		10.1186/s12877-017-0646-6
2017	Kon AA, Davidson JE.	Retiring the Term Futility in Value-Laden Decisions Regarding Potentially Inappropriate Medical Treatment	28148610	USA (CA)	Resource allocation	Editorial		1	1						In accordance with the relevant US critical care organisations, a shared decision-making approach between clinicians and surrogates regarding the withdrawal of ECMO should be employed. The term 'fultility' should be used only concerning physiologically ineffective interventions. All interventions, which involve value-based disagreements between clinicians or between clinicians and surrogates in a…	Kon AA, Davidson JE.		Crit Care Nurse. 2017 Feb;37(1):9-11. doi: 10.4037/ccn2017234.	Kon AA	Crit Care Nurse	2017-02-03		28148610		10.4037/ccn2017234
2017	Makdisi T, Makdisi G.	Ethical challenges in extra corporeal membrane oxygenation use	28595436	USA (MA), USA (FL)	Resource allocation	Editorial		1	1						Emergent situations might force professionals to oversimplify complex conditions and surrogates to consent. Earning the surrogates' trust would be crucial. When ECMO is futile or not contributing to the quality of life according to the patient's wishes, a discussion of limiting treatment should be considered. Patients should not be forced but supported. If the surrogates are unable to decide in s…	Makdisi T, Makdisi G.		Ann Palliat Med. 2017 Dec;6(Suppl 2):S128-S131. doi: 10.21037/apm.2017.03.11. Epub 2017 May 5.	Makdisi T	Ann Palliat Med	2017-06-10		28595436		10.21037/apm.2017.03.11
2019	Brierley J, Marks SD.	Is deceased organ donation using extracorporeal membrane oxygenation transport ethical and feasible?	31535422	UK	EISOR	Editorial		1	1			0			A case report on organ donation from a brain dead child on ECMO is commented on. There would be a lack of internationally standardised, evidence-based assessment of death in paediatric organ donors. Efforts should be invested to change pracise.	Brierley J, Marks SD.		Pediatr Transplant. 2019 Nov;23(7):e13570. doi: 10.1111/petr.13570. Epub 2019 Sep 18.	Brierley J	Pediatr Transplant	2019-09-20		31535422		10.1111/petr.13570
2019	DeMartino ES, Braus NA, Sulmasy DP, Bohman JK, Stulak JM, Guru PK, Fuechtmann KR, Singh N, Schears GJ, Mueller PS.	Decisions to Withdraw Extracorporeal Membrane Oxygenation Support: Patient Characteristics and Ethical Considerations	30853261	USA (MN), USA (DC), USA (FL), USA (NY)	Resource allocation	Review		1	1			1			In the study cohort of patients with withdrawn ECMO (1 in 4 patients on ECMO) almost one-third had DNR orders. Withholding should not be used because withdrawal seems illegal or unethical. This would deny patients an ECMO- trial while prognosis is clarified. Stopping an unwanted or unbeneficial therapy has been affirmed ethically and legally. ECMO-withdrawal differ substantially from euthanasia. …	DeMartino ES, Braus NA, Sulmasy DP, Bohman JK, Stulak JM, Guru PK, Fuechtmann KR, Singh N, Schears GJ, Mueller PS.		Mayo Clin Proc. 2019 Apr;94(4):620-627. doi: 10.1016/j.mayocp.2018.09.020. Epub 2019 Mar 8.	DeMartino ES	Mayo Clin Proc	2019-03-12		30853261		10.1016/j.mayocp.2018.09.020
2019	Grunau B, MacRedmond R, Gill J.	A Promising Therapy in Jeopardy	30664375	Canada	Resource allocation	Commentary		1	1		1	1			Despite the high up-front costs of ECPR, it could be justified because of the high number of selected patients suffering cardiac arrest, who could benefit. Prolonged ECPR would pose ethical tension in patients without neurologic recovery as described in a case, where a young patient's family opposed to the withdrawal of futile ECPR. The Supreme Court of Canada decided that withdrawal would be an …	Grunau B, MacRedmond R, Gill J.		Circulation. 2019 Jan 22;139(4):425-427. doi: 10.1161/CIRCULATIONAHA.118.035674.	Grunau B	Circulation	2019-01-22		30664375		10.1161/CIRCULATIONAHA.118.035674
2019	Henry B, Verbeek PR, Cheskes S.	Extracorporeal cardiopulmonary resuscitation in out-of-hospital cardiac arrest: Ethical considerations	30731112	Canada	Trials and evidence, Resource allocation	Commentary		1	1		1				In ECPR some issues would be still unclear: 1) Should the “load and go” approach be prioritised in regard to the possibility of PCI and ECPR? 2) Should shared decision-making have another role in ECPR in regard to the non-curing nature of bridging on ECPR? 3) How can data registration be standardised and completed and cover both prehospital care and post discharge quality of life as a supplement …	Henry B, Verbeek PR, Cheskes S.		Resuscitation. 2019 Apr;137:1-6. doi: 10.1016/j.resuscitation.2019.01.036. Epub 2019 Feb 4.	Henry B	Resuscitation	2019-02-08		30731112		10.1016/j.resuscitation.2019.01.036
2019	Jaramillo C, Braus N.	How Should ECMO Initiation and Withdrawal Decisions Be Shared?	31127917	USA (MA), USA (WI)	Resource allocation	Commentary		1	1		1				As patient consent alone (without clinical indication) does not justify a medical intervention, beneficence or nonmaleficence do not justify the discontinuation of ECMO without the regard to patient autonomy. The bridge-to-nowhere scenario is not sufficient ethical grounds for this decision either. Unilateral decisions threaten mutual understanding and shared decision-making. Destination does not…	Jaramillo C, Braus N.		AMA J Ethics. 2019 May 1;21(5):E387-393. doi: 10.1001/amajethics.2019.387.	Jaramillo C	AMA J Ethics	2019-05-26		31127917		10.1001/amajethics.2019.387
2020	Antiel RM, Curlin FA, Persad G, White DB, Zhang C, Glickman A, Emanuel EJ, Lantos JD.	Should Pediatric Patients Be Prioritized When Rationing Life-Saving Treatments During COVID-19 Pandemic	32647066	USA (MO), USA (NC), USA (CO), USA (PA)	Resource allocation	Essay		1	1		1	1			The COVID-19 pandemic might impose the raitioning of ECMO. Younger patients should be prioritised due to the egalitarian concept of complete lives saved mediated by prognosis and beneficience in general (prioritising health care workers) in a multi-step approach. This would avoid discrimination by age. Allococation by the first-come-first-served principle or by lottery, social worth, sex, race, f…	Antiel RM, Curlin FA, Persad G, White DB, Zhang C, Glickman A, Emanuel EJ, Lantos JD.		Pediatrics. 2020 Sep;146(3):e2020012542. doi: 10.1542/peds.2020-012542. Epub 2020 Jul 9.	Antiel RM	Pediatrics	2020-07-11		32647066		10.1542/peds.2020-012542
2020	Carlisle EM, Loeff DS.	Emerging issues in the ethical utilization of pediatric extracorporeal membrane oxygenation	32332329	USA (IA), USA (IL)	Resource allocation	Review		1	1		1	1			Advances in ECMO and curative therapy would have increased the number of pontential paediatric candidates. As for some patients ECMO would be associated with excellent outcomes, one could state that its application would be obligatory and in the patient's best interest. Ethics consultation and deliberation should be preventive. Professional consensus should be aquired prior to communication with …	Carlisle EM, Loeff DS.		Curr Opin Pediatr. 2020 Jun;32(3):411-415. doi: 10.1097/MOP.0000000000000901.	Carlisle EM	Curr Opin Pediatr	2020-04-26		32332329		10.1097/MOP.0000000000000901
2020	Combes A, Price S, Slutsky AS, Brodie D.	Temporary circulatory support for cardiogenic shock	32682486	France. UK, Canada	Resource allocation,Trials and evidence	Review		1	1		1	1		1	Temporary circulatory support could be used in cardiogenic shock inspite of missing randomised data. Research would be urgently needed to ascertain the effect of ECMO and its costs. The circumstances under which ECMO is applied would be coint by time pressure and lack of information. Questions would remain about when withholding or withdrawing ECMO is appropriate. Blurred lines between life and d…	Combes A, Price S, Slutsky AS, Brodie D.		Lancet. 2020 Jul 18;396(10245):199-212. doi: 10.1016/S0140-6736(20)31047-3.	Combes A	Lancet	2020-07-20		32682486		10.1016/S0140-6736(20)31047-3
2020	Drake D, Morrow CD, Kinlaw K, De Bonis M, Zangrillo A, Sade RM; Cardiothoracic Ethics Forum.	Cardiothoracic surgeons in pandemics: Ethical considerations	32689702	USA (MI), USA (GA), Italy, USA (SC)	Resource allocation	Guideline		1	1		1	1			In pandemics proactive resource allocation should help gaining individual and cumulative life-years. However, utilitarianism would not be an adaequate ethical approach without addressing the principles of autonomy, maleficence and justice. Discrimination should be avoided. Scarce resources should be allocated to those patients, who benefit most. Allocation by social worth, wealth or the first com…	Drake D, Morrow CD, Kinlaw K, De Bonis M, Zangrillo A, Sade RM; Cardiothoracic Ethics Forum.		J Thorac Cardiovasc Surg. 2020 Aug;160(2):456-459. doi: 10.1016/j.jtcvs.2020.03.117. Epub 2020 Apr 9.	Drake D	J Thorac Cardiovasc Surg	2020-07-22	PMC7146669	32689702		10.1016/j.jtcvs.2020.03.117
2020	Hoyler MM, Kumar S, Thalappillil R, White RS, Tam CW.	VV-ECMO usage in ARDS due to COVID-19: Clinical, practical and ethical considerations	32447163	USA (NY)	Resource allocation	Letter to the editor		1	1		1	1			ECMO might be viewed as unjustifiable in the COVID-19 pandemic, if resources are scarce. COVID-19 patients and all others should be treated following the same ethical principles. These were, as suggested by Emmanuel and collegues: maximising benifit (individually and collectively), which meant patients worst off being prioritised, allocation by instrumental value and lottery. Proactive planning w…	Hoyler MM, Kumar S, Thalappillil R, White RS, Tam CW.		J Clin Anesth. 2020 Oct;65:109893. doi: 10.1016/j.jclinane.2020.109893. Epub 2020 May 20.	Hoyler MM	J Clin Anesth	2020-05-25	PMC7237897	32447163		10.1016/j.jclinane.2020.109893
2020	Lim JKB, Qadri SK, Toh TSW, Lin CB, Mok YH, Lee JH.	Extracorporeal Membrane Oxygenation for Severe Respiratory Failure During Respiratory Epidemics and Pandemics: A Narrative Review	32296808	Singapore	Resource allocation	Review		1	1		1	1			In times of scarce health care resources the development of pre-desaster plans and preparation at national and international level, centralising care and continuing education would be paramount. There are be two broad approaches to guide patient selection for ECMO in a pandemic: 1) the use of ethical principles (broad social value, instrumental value, maximising life years and the life cycle prin…	Lim JKB, Qadri SK, Toh TSW, Lin CB, Mok YH, Lee JH.		Ann Acad Med Singap. 2020 Apr;49(4):199-214.	Lim JKB	Ann Acad Med Singap	2020-04-17		32296808
2020	MacGregor RM, Antiel RM, Najaf T, Said AS, Warner BW, Raval MV, Shakhsheer B.	Extracorporeal Membrane Oxygenation for Pediatric Patients With Coronavirus Disease 2019-Related Illness	32427689	USA (MO), USA (IL)	Resource allocation	Empirical study		1	1		1	0			Although US-organisations had proposed guidelines for the use of ECMO in COVID-19, there would remain a lack of consensus regarding children. A survey in the US showed that most centres had enacted regional guidelines prior to the pandemic and used ECMO following the same indication criteria as in other viral illnesses. Only a minority would have restricted ECMO in terminal illness, CNS damge, DN…	MacGregor RM, Antiel RM, Najaf T, Said AS, Warner BW, Raval MV, Shakhsheer B.		Pediatr Crit Care Med. 2020 May 15. doi: 10.1097/PCC.0000000000002432. Online ahead of print.	MacGregor RM	Pediatr Crit Care Med	2020-05-20		32427689		10.1097/PCC.0000000000002432
2020	Parent B, Moazami N, Wall S, Carillo J, Kon Z, Smith D, Walsh BC, Caplan A.	Ethical and logistical concerns for establishing NRP-cDCD heart transplantation in the United States	31913567	USA (NY)	EISOR	Essay		1	1		1	1			Ethics would require that any conflict of interest in withdrawal of life sustaining treatment (LST) being prevented. According to a review liver, kidey and pancreas grafts from DCD with normothermic regional perfusion (NRP/EISOR) would be of acceptable quality compared to grafts from brain dead donors. Concerns about ensuring that NPR does not affect medical care or hasten death would remain. Con…	Parent B, Moazami N, Wall S, Carillo J, Kon Z, Smith D, Walsh BC, Caplan A.		Am J Transplant. 2020 Jun;20(6):1508-1512. doi: 10.1111/ajt.15772. Epub 2020 Jan 21.	Parent B	Am J Transplant	2020-01-09		31913567		10.1111/ajt.15772
2020	Prekker ME, Brunsvold ME, Bohman JK, Fischer G, Gram KL, Litell JM, Saavedra-Romero R, Hick JL.	Regional Planning for Extracorporeal Membrane Oxygenation Allocation During Coronavirus Disease 2019	32339510	USA (MN)	Resource allocation	Report		1	1		1	1			A prioritising plan for ECMO from a US state is presented preparing for the shortage of ECMO in the COVID-19 pandemic. Athough WHO would suggeste the use of ECMO in refractory hypoxemia, existing guidelines would have neglected the thoughtful allocation of ECMO. Outcome data were not widely available. It would be necessary to limit ECMO to patients according to their benefit on a regional level, …	Prekker ME, Brunsvold ME, Bohman JK, Fischer G, Gram KL, Litell JM, Saavedra-Romero R, Hick JL.		Chest. 2020 Aug;158(2):603-607. doi: 10.1016/j.chest.2020.04.026. Epub 2020 Apr 25.	Prekker ME	Chest	2020-04-28	PMC7182515	32339510		10.1016/j.chest.2020.04.026
2020	Quintel M, Bartlett RH, Grocott MPW, Combes A, Ranieri MV, Baiocchi M, Nava S, Brodie D, Camporota L, Vasques F, Busana M, Marini JJ, Gattinoni L.	Extracorporeal Membrane Oxygenation for Respiratory Failure	32149776	Germany, USA (MI), UK, France, Italy, USA (NY), USA (MN)	Resource allocation	Review		1	1		1	1			The ethical key question concerning ECMO would be whom to put on and whom not to put on ECMO, a question, which would be difficult to answere due to missing evidence. In the scenario of a bridge to nowhere there would be no clear path to handle the patient's or the surrogate's will, if it differs from the professionals' decision. Costs are difficult to assess, especially in international comparis…	Quintel M, Bartlett RH, Grocott MPW, Combes A, Ranieri MV, Baiocchi M, Nava S, Brodie D, Camporota L, Vasques F, Busana M, Marini JJ, Gattinoni L.		Anesthesiology. 2020 May;132(5):1257-1276. doi: 10.1097/ALN.0000000000003221.	Quintel M	Anesthesiology	2020-03-10		32149776		10.1097/ALN.0000000000003221
2020	Shekar K, Badulak J, Peek G, Boeken U, Dalton HJ, Arora L, Zakhary B, Ramanathan K, Starr J, Akkanti B, Antonini MV, Ogino MT, Raman L, Barret N, Brodie D, Combes A, Lorusso R, MacLaren G, Müller T, Paden M, Pellegrino V; ELSO Guideline Working Group.	Extracorporeal Life Support Organization Coronavirus Disease 2019 Interim Guidelines: A Consensus Document from an International Group of Interdisciplinary Extracorporeal Membrane Oxygenation Providers	32604322	Australia, USA (WA), USA (FL), Germany, USA (IA), USA (OR), Singapore, USA (CA), USA (TX), Italy, USA (DE), USA (PA), UK, USA (NY), Netherlands, USA (GA)	Resource allocation	Guideline		1	1		1	1			An ELSO guideline for ECMO in the COVID-19 pandemic is presented. Four tiers are included, rationing approaches increase following the four tiers including withholding of ECMO by risk of staff contamination, patient prognosis and age. At the outset indications of ECMO in COVID-19 should follow general recommendations for ECMO. Centralisation and regular communication between centres and agents we…	Shekar K, Badulak J, Peek G, Boeken U, Dalton HJ, Arora L, Zakhary B, Ramanathan K, Starr J, Akkanti B, Antonini MV, Ogino MT, Raman L, Barret N, Brodie D, Combes A, Lorusso R, MacLaren G, Müller T, Paden M, Pellegrino V; ELSO Guideline Working Group.		ASAIO J. 2020 Jul;66(7):707-721. doi: 10.1097/MAT.0000000000001193.	Shekar K	ASAIO J	2020-07-01		32604322		10.1097/MAT.0000000000001193
2020	Skansebo E, Broomé M, Magnusson J, Riise GC, Dellgren G.	Extended use of extra corporeal membrane oxygenation as bridge to lung transplantation in two patients	31931854	Sweden	Resource allocation	Case Report		1	1		1	1			Prolonged courses on ECMO in relation to lung transplantation were possible in certain presented cases. This would complicate ethical decisions on the omission of therapi.	Skansebo E, Broomé M, Magnusson J, Riise GC, Dellgren G.		J Cardiothorac Surg. 2020 Jan 13;15(1):16. doi: 10.1186/s13019-020-1046-0.	Skansebo E	J Cardiothorac Surg	2020-01-15	PMC6958736	31931854		10.1186/s13019-020-1046-0
2020	Worku E, Gill D, Brodie D, Lorusso R, Combes A, Shekar K.	Provision of ECPR during COVID-19: evidence, equity, and ethical dilemmas	32718340	Australia, USA (NY), Netherlands, France	Resource allocation	Essay		1	1			1			The appropriate use of ECPR would be challenged under COVID-19. The critical care community would have to confront the ethical boundaries between individual rights and distributive justice. ELSO would recommend the limiting of ECPR under the current crises. Cardiac arrest would have had a unfarourable prognosis in COVID-19 according to retrospective studies. Continuing ECPR under COVID-19 would r…	Worku E, Gill D, Brodie D, Lorusso R, Combes A, Shekar K.		Crit Care. 2020 Jul 27;24(1):462. doi: 10.1186/s13054-020-03172-2.	Worku E	Crit Care	2020-07-29	PMC7384274	32718340		10.1186/s13054-020-03172-2
2014	Del Sorbo L, Cypel M, Fan E.	Extracorporeal life support for adults with severe acute respiratory failure	24503270	UK	Trials and evidence	Review		1	1	1		1		1	The long time of recovering on ECMO after ARDS makes it difficult to determine whether the injury is irreversible or when patients should be considered for transplantation. Evidence about pathophysiology and the long term outcomes is missing.	Del Sorbo L, Cypel M, Fan E.		Lancet Respir Med. 2014 Feb;2(2):154-64. doi: 10.1016/S2213-2600(13)70197-8. Epub 2013 Oct 17.	Del Sorbo L	Lancet Respir Med	2014-02-08		24503270		10.1016/S2213-2600(13)70197-8
2015	Ortega-Deballon I, Hornby L, Shemie SD.	Protocols for uncontrolled donation after circulatory death: a systematic review of international guidelines, practices and transplant outcomes	26104293	Canada, Spain	EISOR	Review		1	1	1	0			1	All of the existing guidelines on uncontrolled donation after circulatory death entail ethical issues, especially concerning consent, irreversibility of cardiac arrest, possible re-establishment of oxygenated perfusion of the brain and conflict of interests between resuscitation attempts and organ-preserving attempts. However, the guidelines assess these issues heterogeneously. More standardisati…	Ortega-Deballon I, Hornby L, Shemie SD.		Crit Care. 2015 Jun 24;19(1):268. doi: 10.1186/s13054-015-0985-7.	Ortega-Deballon I	Crit Care	2015-06-25	PMC4495857	26104293		10.1186/s13054-015-0985-7
2017	Trummer G, Supady A, Beyersdorf F, Scherer C, Wengenmayer T, Umhau M, Benk C.	Controlled automated reperfusion of the whole body after 120 minutes of Cardiopulmonary resuscitation: first clinical report	28693585	Germany	Resource allocation	Case report		1	1						The question as to how long rescuscitation efforts have to be continued and whether eCPR should be offered after a long period of CPR is yet again challenged by this case report with long-term survival without neurological sequelae after application of a novel ECLS technique.	Trummer G, Supady A, Beyersdorf F, Scherer C, Wengenmayer T, Umhau M, Benk C.		Scand J Trauma Resusc Emerg Med. 2017 Jul 10;25(1):66. doi: 10.1186/s13049-017-0412-y.	Trummer G	Scand J Trauma Resusc Emerg Med	2017-07-12	PMC5504811	28693585		10.1186/s13049-017-0412-y
2017	Yukawa T, Kashiura M, Sugiyama K, Tanabe T, Hamabe Y.	Neurological outcomes and duration from cardiac arrest to the initiation of extracorporeal membrane oxygenation in patients with out-of-hospital cardiac arrest: a retrospective study	28915913	Japan	Trials and evidence	Empirical study		1	1			0			The study would show a significant but limited (time related) benefit of ECPR regarding survival and neurologic outcome. The human and economic costs of ECPR were unknown, strict selection and prospective studies were needed to determine the standard indication of ECPR in cardiac arrest.	Yukawa T, Kashiura M, Sugiyama K, Tanabe T, Hamabe Y.		Scand J Trauma Resusc Emerg Med. 2017 Sep 16;25(1):95. doi: 10.1186/s13049-017-0440-7.	Yukawa T	Scand J Trauma Resusc Emerg Med	2017-09-17	PMC5603067	28915913		10.1186/s13049-017-0440-7
2018	Periche Pedra E, Koborzan MR, Sbraga F, Blasco Lucas A, Toral Sepúlveda D.	Outcomes of extracorporeal membrane oxygenation in adult patients with hypoxemic respiratory failure refractory to mechanical ventilation	30237974	Spain	Resource allocation	Empirical study		0	1		0				Data on the beneficial effect of ECMO in ARDS would be limited but support its use in a controlled manner. Reversibiity of the respiratory failure and the absence of any other therapeutic limitation were prerequisites to ECMO and inherent in therapeutic decisions when the prognosis remains uncertain. There would be evidence of the positive effect of centralising ECMO therapy. Multidisciplinary an…	Periche Pedra E, Koborzan MR, Sbraga F, Blasco Lucas A, Toral Sepúlveda D.		Respir Med Case Rep. 2018 Sep 13;25:220-224. doi: 10.1016/j.rmcr.2018.09.007. eCollection 2018.	Periche Pedra E	Respir Med Case Rep	2018-09-22	PMC6143695	30237974		10.1016/j.rmcr.2018.09.007
2018	Ross LF.	Respecting Choice in Definitions of Death	30584847	USA (IL)	EISOR	Essay		0	1		0				Due to inherent metaphysical content, death would probably never be defined uniformly for people, professionals or laymen. A range of possibilities should be approved reaching from the entire brain death to the irreversible loss of conciousness. Halevy and Brody showed that the irreversible loss of the entire brain function is not guaranteed by DBD so far. Clinicians would measure different thing…	Ross LF.		Hastings Cent Rep. 2018 Nov;48 Suppl 4:S53-S55. doi: 10.1002/hast.956.	Ross LF	Hastings Cent Rep	2018-12-26		30584847		10.1002/hast.956
2018	Singer B, Reynolds JC, Lockey DJ, O'Brien B.	Pre-hospital extra-corporeal cardiopulmonary resuscitation	29587810	UK	Resource allocation	Review		0	1						Multiple observational studies in ECPR would have identified several prognostic issues as e.g. the time of no- or low-flow before and under CPR, which should be applied in ECPR-programs. Logistical obstacles and oppurtunity costs under the inherent risk of over-triage should be hold against the benefits of the rapid response in pre-hospital ECPR.	Singer B, Reynolds JC, Lockey DJ, O'Brien B.		Scand J Trauma Resusc Emerg Med. 2018 Mar 27;26(1):21. doi: 10.1186/s13049-018-0489-y.	Singer B	Scand J Trauma Resusc Emerg Med	2018-03-29	PMC5870373	29587810		10.1186/s13049-018-0489-y
2020	Cheruku S, Dave S, Goff K, Park C, Ebeling C, Cohen L, Styrvoky K, Choi C, Anand V, Kershaw C.	Cardiopulmonary Resuscitation in Intensive Care Unit Patients With Coronavirus Disease 2019	32620487	USA (TX)	Resource allocation	Review		1	1		0	1			All patients hospitalised with COVID-19 should be asked about there attitudes towards goals of care and resuscitation if possible. Due to the risk of contamination and the low expectance of sufficient recovery several countries would have restricted their recommendations about CPR. In the US the treatment of patients with covid-19 differ betwwen hospitals. An utilitarian approach based on conside…	Cheruku S, Dave S, Goff K, Park C, Ebeling C, Cohen L, Styrvoky K, Choi C, Anand V, Kershaw C.		J Cardiothorac Vasc Anesth. 2020 Oct;34(10):2595-2603. doi: 10.1053/j.jvca.2020.06.008. Epub 2020 Jun 10.	Cheruku S	J Cardiothorac Vasc Anesth	2020-07-05	PMC7286272	32620487		10.1053/j.jvca.2020.06.008
2020	Gardiner D, Charlesworth M, Rubino A, Madden S.	The rise of organ donation after circulatory death: a narrative review	32430909	UK	EISOR	Review		1	1			1		1	In the UK DCD programme the Organ Donation Taskforce and a broad engagement of different organisations would have helped address ethical issues in advance. The ambition would have been to make DCD a normal part of end-of-life care. 5 min of asystole would be claimed by the Academy of Royal Medical Colleges as prerequisit for DCDD. Thoraco-abdominal normothermic regional perfusion (NRP/EISOR) woul…	Gardiner D, Charlesworth M, Rubino A, Madden S.		Anaesthesia. 2020 Sep;75(9):1215-1222. doi: 10.1111/anae.15100. Epub 2020 May 19.	Gardiner D	Anaesthesia	2020-05-21		32430909		10.1111/anae.15100
2015	Mancini ME, Diekema DS, Hoadley TA, Kadlec KD, Leveille MH, McGowan JE, Munkwitz MM, Panchal AR, Sayre MR, Sinz EH.	Part 3: Ethical Issues: 2015 American Heart Association Guidelines Update for Cardiopulmonary Resuscitation and Emergency Cardiovascular Care	26472991	USA (TX), USA (WA), USA (IL), USA (NE), USA (PA), USA (AZ), USA (OH)	Resource allocation	Guideline		1	1	1				1	In CPR there is a relevant risk of conflict with the patient’s unknown interest. The decision about whether or not to initiate/maintain CPR is ideally based on science, law, patient/surrogate preferences, policies and established ethical principles. Informed consent presupposes the patient’s active deliberation. Withholding and withdrawing life-sustaining treatment are ethically equivalent. When …	Mancini ME, Diekema DS, Hoadley TA, Kadlec KD, Leveille MH, McGowan JE, Munkwitz MM, Panchal AR, Sayre MR, Sinz EH.		Circulation. 2015 Nov 3;132(18 Suppl 2):S383-96. doi: 10.1161/CIR.0000000000000254.	Mancini ME	Circulation	2015-10-17		26472991		10.1161/CIR.0000000000000254
2018	Dalle Ave AL, Bernat JL.	Uncontrolled Donation After Circulatory Determination of Death: A Systematic Ethical Analysis	28296536	Switzerland, USA (NH)	EISOR	Review		1	1	1		1			There still is an irreducible uncertainty over how long resuscitation should be continued in a particular case. Therefore physicians should ascertain that the patient is not recoverable by additional resuscitation techniques before considering the patient’s entry into an uncontrolled donation after circulatory death protocol. The no-touch period should at least be 10 minutes. The professional rol…	Dalle Ave AL, Bernat JL.		J Intensive Care Med. 2018 Nov;33(11):624-634. doi: 10.1177/0885066616682200. Epub 2016 Dec 21.	Dalle Ave AL	J Intensive Care Med	2017-03-16		28296536		10.1177/0885066616682200
2018	Kirsch R, Munson D.	Ethical and end of life considerations for neonates requiring ECMO support	29331209	Canada, USA (PA)	Resource allocation	Essay		1	1	1					Early, clear and compassionate communication could help guiding through the initiation, course and discontinuation of ECMO. Rationing should occur proximally to the individual case. The ethical principles of autonomy, nonmaleficience and justice should be respected. ECMO does not differ from other life-sustaining-therapy in an ethical sense. The neonate may be granted a unique ethical status.	Kirsch R, Munson D.		Semin Perinatol. 2018 Mar;42(2):129-137. doi: 10.1053/j.semperi.2017.12.009. Epub 2018 Jan 10.	Kirsch R	Semin Perinatol	2018-01-15		29331209		10.1053/j.semperi.2017.12.009
2019	Gutteridge D, Bosslet GT.	What Should We Learn From Early Hemodialysis Allocation About How We Should Be Using ECMO?	31127922	USA (IN)	Resource allocation	Commentary		1	1	1					Deliberative democracy could help organisations and users to make the right decisions about ECMO, just as it developed the management of haemodialysis and organ transplantation. It could be organized around the topics contraindications of ECMO and the role of QUALY’s and reach further to the debate about technology and therapeutic futility at the end of life.	Gutteridge D, Bosslet GT.		AMA J Ethics. 2019 May 1;21(5):E421-428. doi: 10.1001/amajethics.2019.421.	Gutteridge D	AMA J Ethics	2019-05-26		31127922		10.1001/amajethics.2019.421
2019	Meltzer EC, Ivascu NS, Edwin MK, Ingall TJ.	Should Long-Term Life-Sustaining Care Be Started in Emergency Settings?	31127919	USA (AZ), USA (NY)	Resource allocation	Commentary		1	1	1					The proportionality of VA-ECMO should be assessed as in other life-sustaining therapies. But, the fact that ECMO is depending on alternatives (restitution, VAD, TX) makes it an exceptional treatment. It should be offered although no surrogates are known, based on the assumption that consent would be rational to the patient. This consent should be re-assessed and verified in an ongoing process inv…	Meltzer EC, Ivascu NS, Edwin MK, Ingall TJ.		AMA J Ethics. 2019 May 1;21(5):E401-406. doi: 10.1001/amajethics.2019.401.	Meltzer EC	AMA J Ethics	2019-05-26		31127919		10.1001/amajethics.2019.401
2019	Molina M, Domínguez-Gil B, Pérez-Villares JM, Andrés A.	Uncontrolled donation after circulatory death: ethics of implementation	31090649	Spain	EISOR	Review		1	1	1					Running a uDCD-program is feasible also in combination with an ECPR-program and considered by international guidelines. Ignoring uDCD as a possibility may therefore be seen as inadequate praxis. Ethical concerns can be diminished by separation of the treating teams, a sufficient monitoring under transport and the in-hospital determination of death, which should be based on the permanent cessation…	Molina M, Domínguez-Gil B, Pérez-Villares JM, Andrés A.		Curr Opin Organ Transplant. 2019 Jun;24(3):358-363. doi: 10.1097/MOT.0000000000000648.	Molina M	Curr Opin Organ Transplant	2019-05-16		31090649		10.1097/MOT.0000000000000648
2019	Mulaikal TA, Nakagawa S, Prager KM.	Extracorporeal Membrane Oxygenation Bridge to No Recovery	30664369	USA (NY)	Resource allocation	Commentary		1	1	1					V-A ECMO leads to unique ethical challenges in relation to the withdrawal of futile treatment. Patients on ECMO with severe neurological dysfunction and without the prospect of discharge from the ICU should be legally withdrawn from active treatment as long as there is consensus among the treating physicians. Futility compromises professional integrity. ECMO should be communicated like other code…	Mulaikal TA, Nakagawa S, Prager KM.		Circulation. 2019 Jan 22;139(4):428-430. doi: 10.1161/CIRCULATIONAHA.118.036304.	Mulaikal TA	Circulation	2019-01-22		30664369		10.1161/CIRCULATIONAHA.118.036304
2019	Sonntag EA, Shah KB, Katz JN.	Educating Resident and Fellow Physicians on the Ethics of Mechanical Circulatory Support	31127920	USA (NC), USA (IL), USA (VA)	Resource allocation	Commentary		1	1	1		1			Ethics of MCS should be taught in residency for cardiologists and cardiac surgeons including the concepts of patient best interest, beneficence and nonmaleficence, respect for autonomy, shared decision-making and informed consent, surrogate-decision making and end of life care, including withdrawing and withholding and palliative care.	Sonntag EA, Shah KB, Katz JN.		AMA J Ethics. 2019 May 1;21(5):E407-415. doi: 10.1001/amajethics.2019.407.	Sonntag EA	AMA J Ethics	2019-05-26		31127920		10.1001/amajethics.2019.407
2019	Tchana-Sato V, Ledoux D, Detry O, Hans G, Ancion A, D'Orio V, Massion PB, Amabili P, Bruls S, Lavigne JP, Monard J, Delbouille MH, Sakalihasan N, Defraigne JO.	Successful clinical transplantation of hearts donated after circulatory death using normothermic regional perfusion	31128600	Belgium	EISOR	Case report		1	1	1					The ante-mortem interventions described in the article and the restoration of circulation after declaration of death might be sensitive ethical issues and restrict EISOR in some countries. A good outcome and a safe no-touch-period as well as the clamping of the aortic arch vessels should be held against any reservations.	Tchana-Sato V, Ledoux D, Detry O, Hans G, Ancion A, D'Orio V, Massion PB, Amabili P, Bruls S, Lavigne JP, Monard J, Delbouille MH, Sakalihasan N, Defraigne JO.		J Heart Lung Transplant. 2019 Jun;38(6):593-598. doi: 10.1016/j.healun.2019.02.015.	Tchana-Sato V	J Heart Lung Transplant	2019-05-27		31128600		10.1016/j.healun.2019.02.015
2010	Strueber M.	Extracorporeal support as a bridge to lung transplantation	19952734		Resource allocation	Review		1	1						ECLS in lungtransplantation would lead to questions of just transplant allocation and the balancing of waiting list mortality against posttransplant survival.	Strueber M.		Curr Opin Crit Care. 2010 Feb;16(1):69-73. doi: 10.1097/MCC.0b013e3283353ce0.	Strueber M	Curr Opin Crit Care	2009-12-03		19952734		10.1097/MCC.0b013e3283353ce0
2011	Geraci PM, Sepe V.	Non-heart-beating organ donation in Italy	21617625	Italy	EISOR	Review		1	1						The declaration of death and the evaluation of a potential donor should be separated. The rights of the living and dead should be respected. The post-mortem splanchnic perfusion by ECMO would not annul the determination of the donors' death. When breaking bad news, a request for organ donation should not be includet.	Geraci PM, Sepe V.		Minerva Anestesiol. 2011 Jun;77(6):613-23.	Geraci PM	Minerva Anestesiol	2011-05-28		21617625
2013	Neyrinck A, Van Raemdonck D, Monbaliu D.	Donation after circulatory death: current status	23632566	Belgium	EISOR	Review		1	1						Ethical issues in EISOR would be related to the conflict between the donor's harm and the recipient's claim on graft's of good quality, the risk of hastening death and of the uncertainty of the method and the timing of the determination of death. Standardising guidelines were missing but under development.	Neyrinck A, Van Raemdonck D, Monbaliu D.		Curr Opin Anaesthesiol. 2013 Jun;26(3):382-90. doi: 10.1097/ACO.0b013e328360dc87.	Neyrinck A	Curr Opin Anaesthesiol	2013-05-02		23632566		10.1097/ACO.0b013e328360dc87
2018	Gattinoni L, Vasques F, Quintel M.	Use of ECMO in ARDS: does the EOLIA trial really help?	29976250	Germany	Trials and evidence	Editorial		1	1						After the EOLIA-trial another RCT of ECMO versus non-ECMO in severe hypoxia seemed unethical and unpractical.	Gattinoni L, Vasques F, Quintel M.		Crit Care. 2018 Jul 5;22(1):171. doi: 10.1186/s13054-018-2098-6.	Gattinoni L	Crit Care	2018-07-07	PMC6034241	29976250		10.1186/s13054-018-2098-6
2018	Han JJ, Swain JD.	The Perfect ECMO Candidate	29519358	USA (PA)	Resource allocation	Case report		1	1						The author, trainee in cardiac surgery, presents a disputable case of initiating ECMO in a setting of unclear acute multiorgan failure. ECMO would mean a substantial drainage of intensive care resources and, therefore, should be allocated to selected patients only. Besides the existing guidelines one had to cope with strong emotions that went along with the decision-making process. Training in th…	Han JJ, Swain JD.		J Am Coll Cardiol. 2018 Mar 13;71(10):1178-1182. doi: 10.1016/j.jacc.2018.02.001.	Han JJ	J Am Coll Cardiol	2018-03-10		29519358		10.1016/j.jacc.2018.02.001
2018	MacLaren G.	When to initiate ECMO with low likelihood of success	30231907	Singapore, Australia	Resource allocation	Editorial		1	1						In some exceptional cases ECMO might be indicated although the expected short term survival might be low. If the long term outcome is estimated as conceivable, the (or an alternative) institution has sufficient resources, patient and surrogates assent and the ECMO leadership is supportive, it should be considered. Physicians should not deny ECMO, just because it might be seen as unfair to other p…	MacLaren G.		Crit Care. 2018 Sep 19;22(1):217. doi: 10.1186/s13054-018-2162-2.	MacLaren G	Crit Care	2018-09-21	PMC6145325	30231907		10.1186/s13054-018-2162-2
2018	Salna M, Takeda K, Kurlansky P, Ikegami H, Fan L, Han J, Stein S, Topkara V, Yuzefpolskaya M, Colombo PC, Karmpaliotis D, Naka Y, Kirtane AJ, Garan AR, Takayama H.	The influence of advanced age on venous-arterial extracorporeal membrane oxygenation outcomes	29365092	USA (NY)	Resource allocation	Retrospective observational study		1	0						Advanced age is an independent risk factor for high mortality, yet factors as frailty and comorbidity must be assessed and age alone should not exclude from VA-ECMO. The authers suggest further studies are needed and that patient selection should be based on individual assessment by the health care team.	Salna M, Takeda K, Kurlansky P, Ikegami H, Fan L, Han J, Stein S, Topkara V, Yuzefpolskaya M, Colombo PC, Karmpaliotis D, Naka Y, Kirtane AJ, Garan AR, Takayama H.		Eur J Cardiothorac Surg. 2018 Jun 1;53(6):1151-1157. doi: 10.1093/ejcts/ezx510.	Salna M	Eur J Cardiothorac Surg	2018-01-25		29365092		10.1093/ejcts/ezx510
2018	Stephens AL, Bruce CR.	Setting Expectations for ECMO: Improving Communication Between Clinical Teams and Decision Makers	29977468	USA (TX)	Resource allocation	Report		1	1						The ethics team described in the article would serve the communication about ECMO between the professionals and between the professionals and surrogates. When ECMO discontinuation is the most viable option, it is appropriate to switch from a collaborative to a more guiding approach in order to free surrogates from the burden of decision.	Stephens AL, Bruce CR.		Methodist Debakey Cardiovasc J. 2018 Apr-Jun;14(2):120-125. doi: 10.14797/mdcj-14-2-120.	Stephens AL	Methodist Debakey Cardiovasc J	2018-07-07	PMC6027715	29977468		10.14797/mdcj-14-2-120
2019	Kimmoun A, Levy B.	Predicting clinical outcome in patients undergoing VA-ECMO	30764857	France	Resource allocation	Editorial		1	1						Important to be aware of the background of the development of predictive scores, as many are developed for patients already on ECMO and thus interpretation and use of these predictive scores may occur for the wrong reasons.	Kimmoun A, Levy B.		Crit Care. 2019 Feb 14;23(1):47. doi: 10.1186/s13054-019-2350-8.	Kimmoun A	Crit Care	2019-02-16	PMC6376643	30764857		10.1186/s13054-019-2350-8
2019	Kumar Puri N, Conrad SA.	Painting a Fuller Picture	31524697	USA (NJ), USA (LA)	Resource allocation	Commentary		1	1						The empirical study on physicians' attidutes towards limitation of ECLS by Abrams et al. is commented on. The low frequency of proning prior to ECLS is mentioned as well as the lack of discussing withdrawal of ECLS upon cannulation and the consequent involvement of patients, surrogates and nurses in decision-making. Limiting care could be seen as a strategy of avoiding hard withdrawal of therapy …	Kumar Puri N, Conrad SA.		Crit Care Med. 2019 Oct;47(10):1459-1460. doi: 10.1097/CCM.0000000000003946.	Kumar Puri N	Crit Care Med	2019-09-17		31524697		10.1097/CCM.0000000000003946
2019	Shapey IM, Summers A, Augustine T, van Dellen D.	Systematic review to assess the possibility of return of cerebral and cardiac activity after normothermic regional perfusion for donors after circulatory death	30667536	UK	EISOR	Review		1	1						A sytematic review comparing retrospective studies on the outcome of ECPR in OHCA and NRP-DCD (normothermic regional perfusion in DCD/EISOR) are presented. Where ECPR would increase the amount of both survivers with good and poor neurological results, NRP-DCD would improve the viability of kidney and liver grafts. Ethical considerations associated with NPR-DCD would include premortem intervention…	Shapey IM, Summers A, Augustine T, van Dellen D.		Br J Surg. 2019 Feb;106(3):174-180. doi: 10.1002/bjs.11046. Epub 2019 Jan 22.	Shapey IM	Br J Surg	2019-01-23	PMC6749564	30667536		10.1002/bjs.11046
2019	Volpi S, Sertic F, Valchanov K, De Silva R.	Use veno-venous extra corporeal membrane oxygenation in elderly patients with post-cardiotomy hypoxia: the changing paradigm of respiratory support in adult respiratory distress syndrome	30642349	UK	Resource allocation	Case report		1	1						There is no specific age-limit to VV-ECMO and despite high mortality rates, careful selected elderly patients may benefit from the intervention.	Volpi S, Sertic F, Valchanov K, De Silva R.		J Cardiothorac Surg. 2019 Jan 14;14(1):10. doi: 10.1186/s13019-019-0833-y.	Volpi S	J Cardiothorac Surg	2019-01-16	PMC6332628	30642349		10.1186/s13019-019-0833-y
2020	Ehmann MR, Zink EK, Levin AB, Suarez JI, Belcher HM, Daugherty Biddison EL, Doberman DJ, D'Souza K, Fine DM, Garibaldi BT, Gehrie EA, Golden SH, Gurses AP, Hill PM, Hughes MT, Kahn J, Koch CG, Marx JJ, Meisenberg BR, Natterman J, Rushton CH, Sapirstein A, Selinger SR, Stephens RS, Toner ES, Unguru Y, van Stone M, Kachalia A.	Operational recommendations for scarce resource allocation in a public health crisis	32991873	USA (MD)	Resource allocation	Report		1	1			1			A US-state resourceallocation program in scarcity during COVID-19 is presented. It would be based on a public survey on citizen's values. Each resource would require an individual approach. Data allowing the prognostic comparison of COVID-19 patients on and those eligible for ECMO would be missing. Patients should not be (de-)selected according to arbitrary criteria. Patients on ECMO should be re…	Ehmann MR, Zink EK, Levin AB, Suarez JI, Belcher HM, Daugherty Biddison EL, Doberman DJ, D'Souza K, Fine DM, Garibaldi BT, Gehrie EA, Golden SH, Gurses AP, Hill PM, Hughes MT, Kahn J, Koch CG, Marx JJ, Meisenberg BR, Natterman J, Rushton CH, Sapirstein A, Selinger SR, Stephens RS, Toner ES, Unguru Y, van Stone M, Kachalia A.		Chest. 2020 Sep 26:S0012-3692(20)34804-2. doi: 10.1016/j.chest.2020.09.246. Online ahead of print.	Ehmann MR	Chest	2020-09-29	PMC7521357			10.1016/j.chest.2020.09.246
2020	Lorusso R, Whitman G, Milojevic M, Raffa G, McMullan DM, Boeken U, Haft J, Bermudez C, Shah A, D'Alessandro DA.	2020 EACTS/ELSO/STS/AATS expert consensus on post-cardiotomy extracorporeal life support in adult patients	33039139	Netherlands, USA (MD), Serbia, Italy, USA (WA), Germany, USA (MI), USA (PA), USA (TN), USA (MA)	Resource allocation	Guideline		1	1						Randomised data on the outcome of post-cardiotomy ECLS (PC-ECLS) were missing. Long-term survival and QOL were unpredictable under PC-ECLS. Overwhelming responsibility might stress surrogates. Guiding decision-making would be recommended. ECLS-professionals would commonly favour decision-making authority for ECLS-patients. Withdrawal should be undertaking when it has been determined that acceptab…	Lorusso R, Whitman G, Milojevic M, Raffa G, McMullan DM, Boeken U, Haft J, Bermudez C, Shah A, D'Alessandro DA.		J Thorac Cardiovasc Surg. 2020 Oct 7:S0022-5223(20)32642-8. doi: 10.1016/j.jtcvs.2020.09.045. Online ahead of print.	Lorusso R	J Thorac Cardiovasc Surg	2020-10-11				10.1016/j.jtcvs.2020.09.045
2020	Manara A, Shemie SD, Large S, Healey A, Baker A, Badiwala M, Berman M, Butler AJ, Chaudhury P, Dark J, Forsythe J, Freed DH, Gardiner D, Harvey D, Hornby L, MacLean J, Messer S, Oniscu GC, Simpson C, Teitelbaum J, Torrance S, Wilson LC, Watson CJE.	Maintaining the permanence principle for death during in situ normothermic regional perfusion for donation after circulatory death organ recovery: A United Kingdom and Canadian proposal	31922653	UK, Canada	EISOR	Essay		1	1			1			In Canada, the UK, Belgium and the Netherlands DCD would account for a substantial part of organ donation procedures. Regarding the use of NPR/EISOR there were concerns about the collateral perfusion of the brain, and thus the reversal of the declaration of death as it is framed by the concept of permanence. Novel surgical techniques are presented, which would minimise (and in case of abdominal c…	Manara A, Shemie SD, Large S, Healey A, Baker A, Badiwala M, Berman M, Butler AJ, Chaudhury P, Dark J, Forsythe J, Freed DH, Gardiner D, Harvey D, Hornby L, MacLean J, Messer S, Oniscu GC, Simpson C, Teitelbaum J, Torrance S, Wilson LC, Watson CJE.		Am J Transplant. 2020 Aug;20(8):2017-2025. doi: 10.1111/ajt.15775. Epub 2020 Jan 27.	Manara A	Am J Transplant	2020-01-11		31922653		10.1111/ajt.15775
2020	Supady A, Bode C, Duerschmied D.	Procedural justice and egalitarian principles for rationing decisions in the COVID-19 crisis	32993767	Germany	Resource allocation	Letter		1	1			1			A commentary on an editorial published by Abrams et al. on ECMO under COVID-19 is presented. The utilitarian approach is critisised and replaced by Norman Daniels' egalitarian approach including the conditions of publicity, relevance, revision and appeals and regulation. The essential advantage of Daniels' concept would be the publics's role and participation in prioritising ECMO through transpar…	Supady A, Bode C, Duerschmied D.		Crit Care. 2020 Sep 29;24(1):590. doi: 10.1186/s13054-020-03283-w.	Supady A	Crit Care	2020-09-30	PMC7524376			10.1186/s13054-020-03283-w

## Sheet: Data
			INCLUDED ARTICLES:	Number of articles:
Total number of articles after search:	144		Trials & evidence	24
Other language	0		Resource allocation, decision making, limiting care:	89
Rejected by abstract (no mention of ethics or ethical reasoning not related to topic)	0		EISOR	29
Rejected by abstract (no mention of ethics or ethical reasoning)	4		Total:	142
Articles to review in full:	140		EXCLUDED ARTICLES
(Marc har gennemgået, og kommenteret tidligere)	145		Other language	9
			Other subject	198
Mangler gennemgang	-5		No access	27
			Republication	3
			Total:	237
			TOTAL	379
